# Supplementary material
Source: ML conference proceedings conference paper supplement (https://openreview.net/forum?id=mZHbkbYWTp)

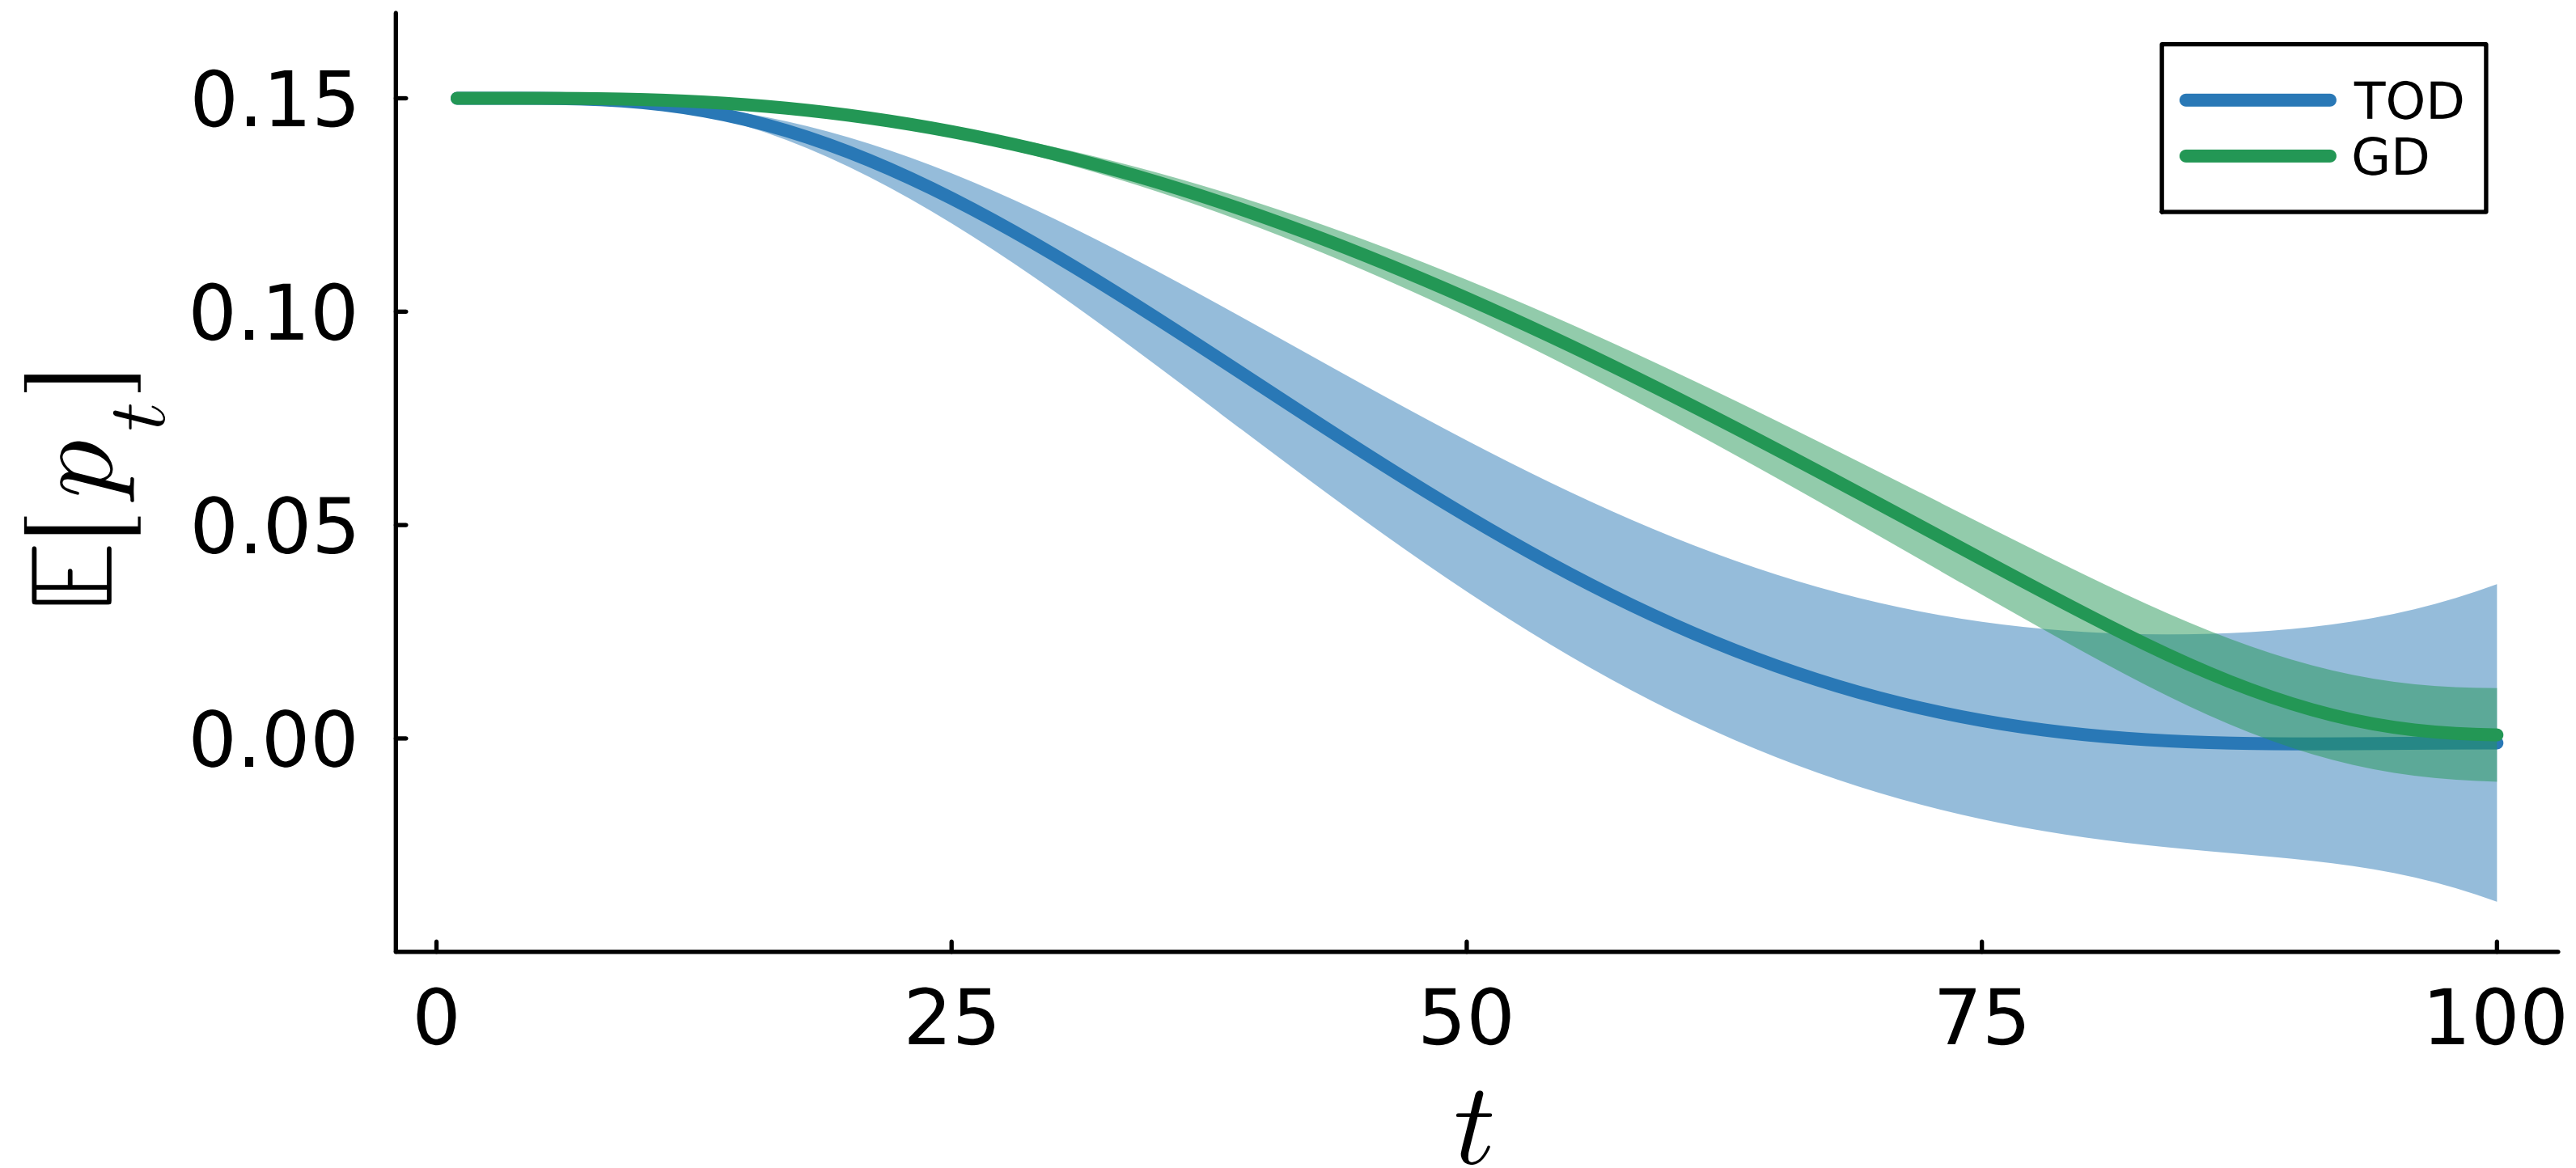

Supplement: supplementary_material [file attachment]

Iterative —  $GD$

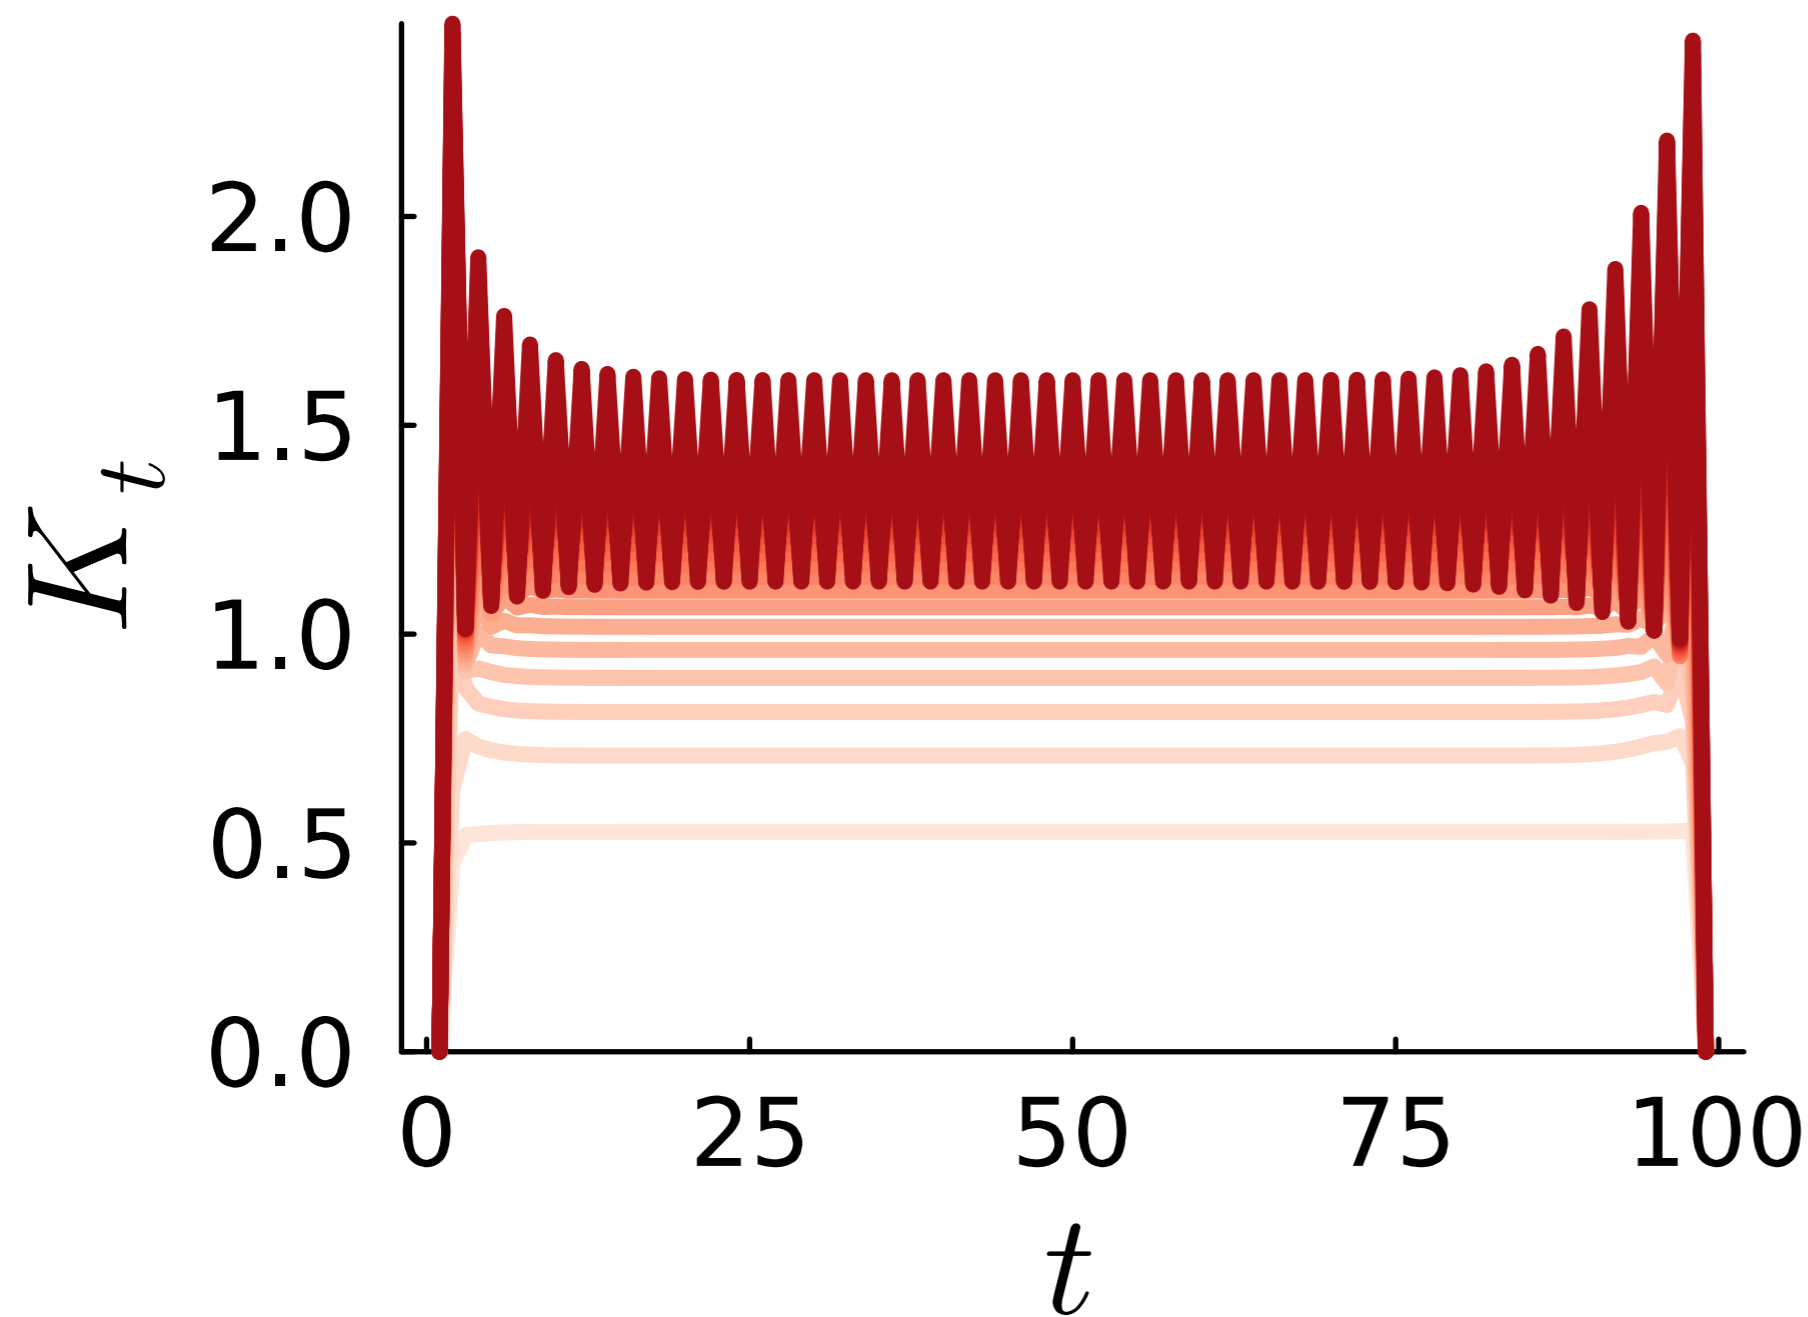

$GD$

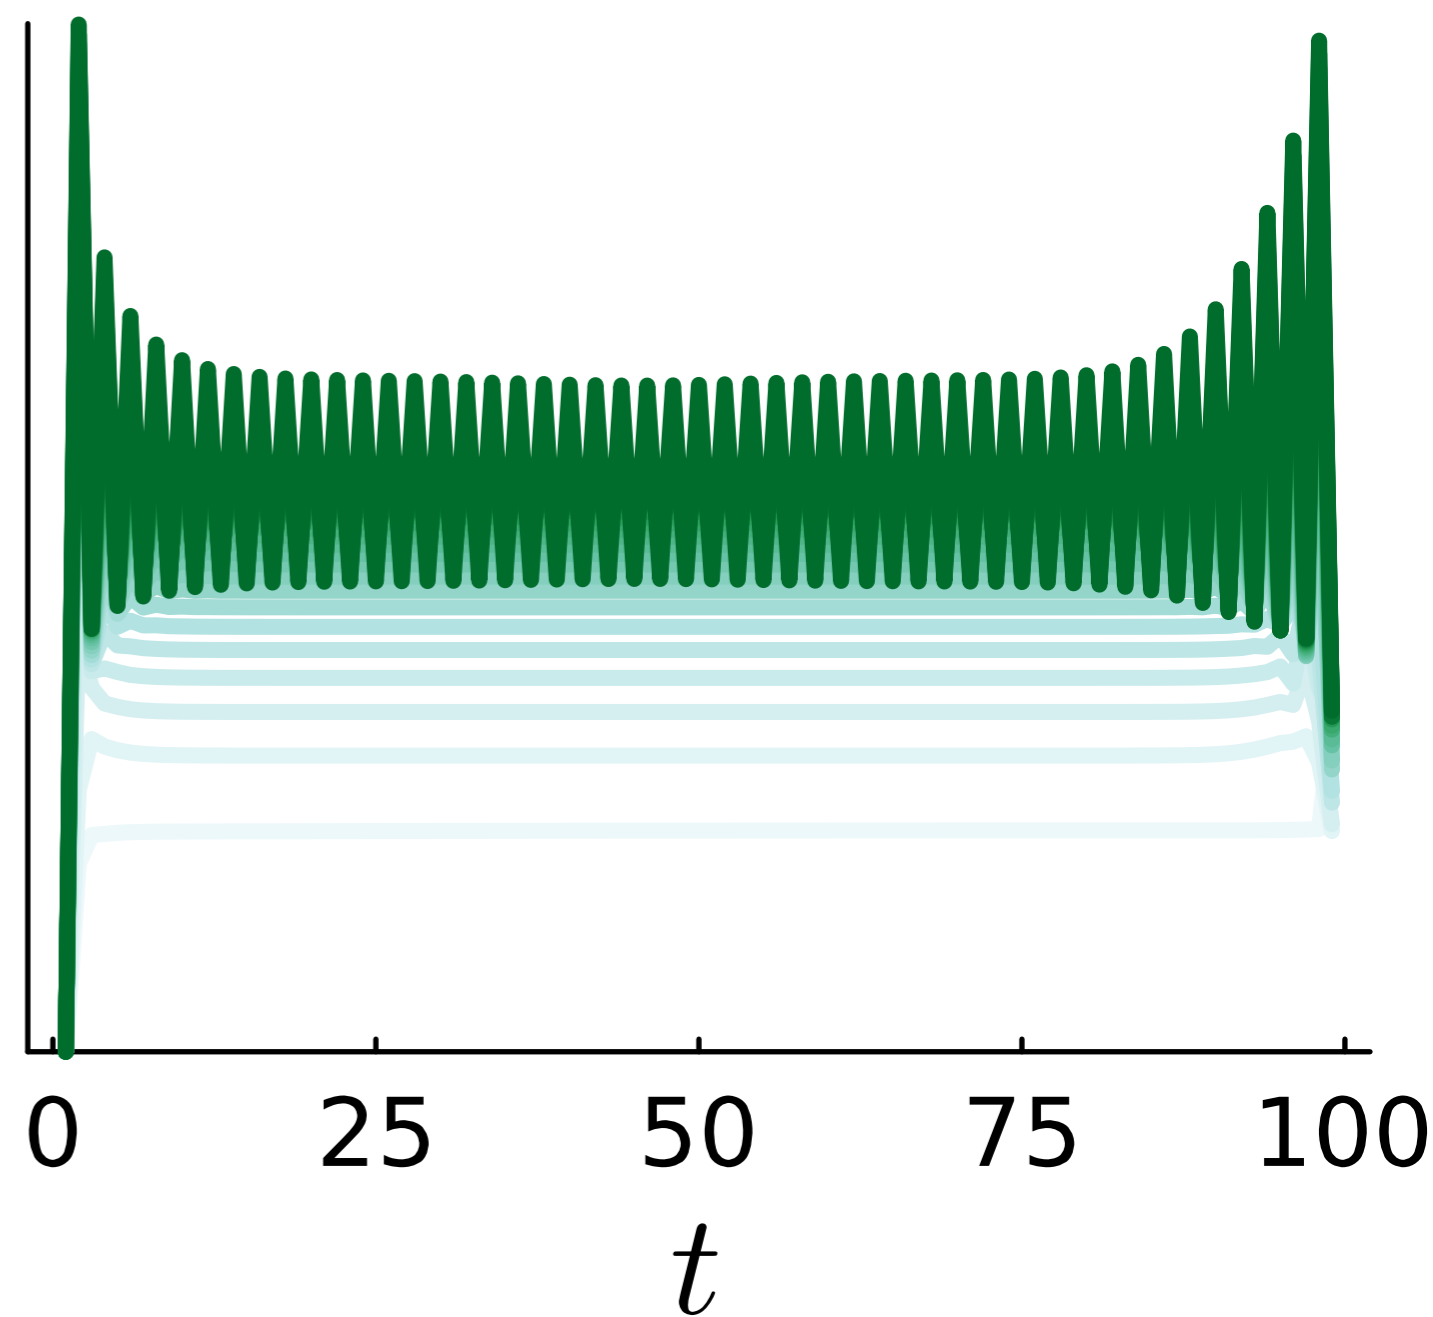

Supplement: supplementary_material [file attachment]

*TOD*

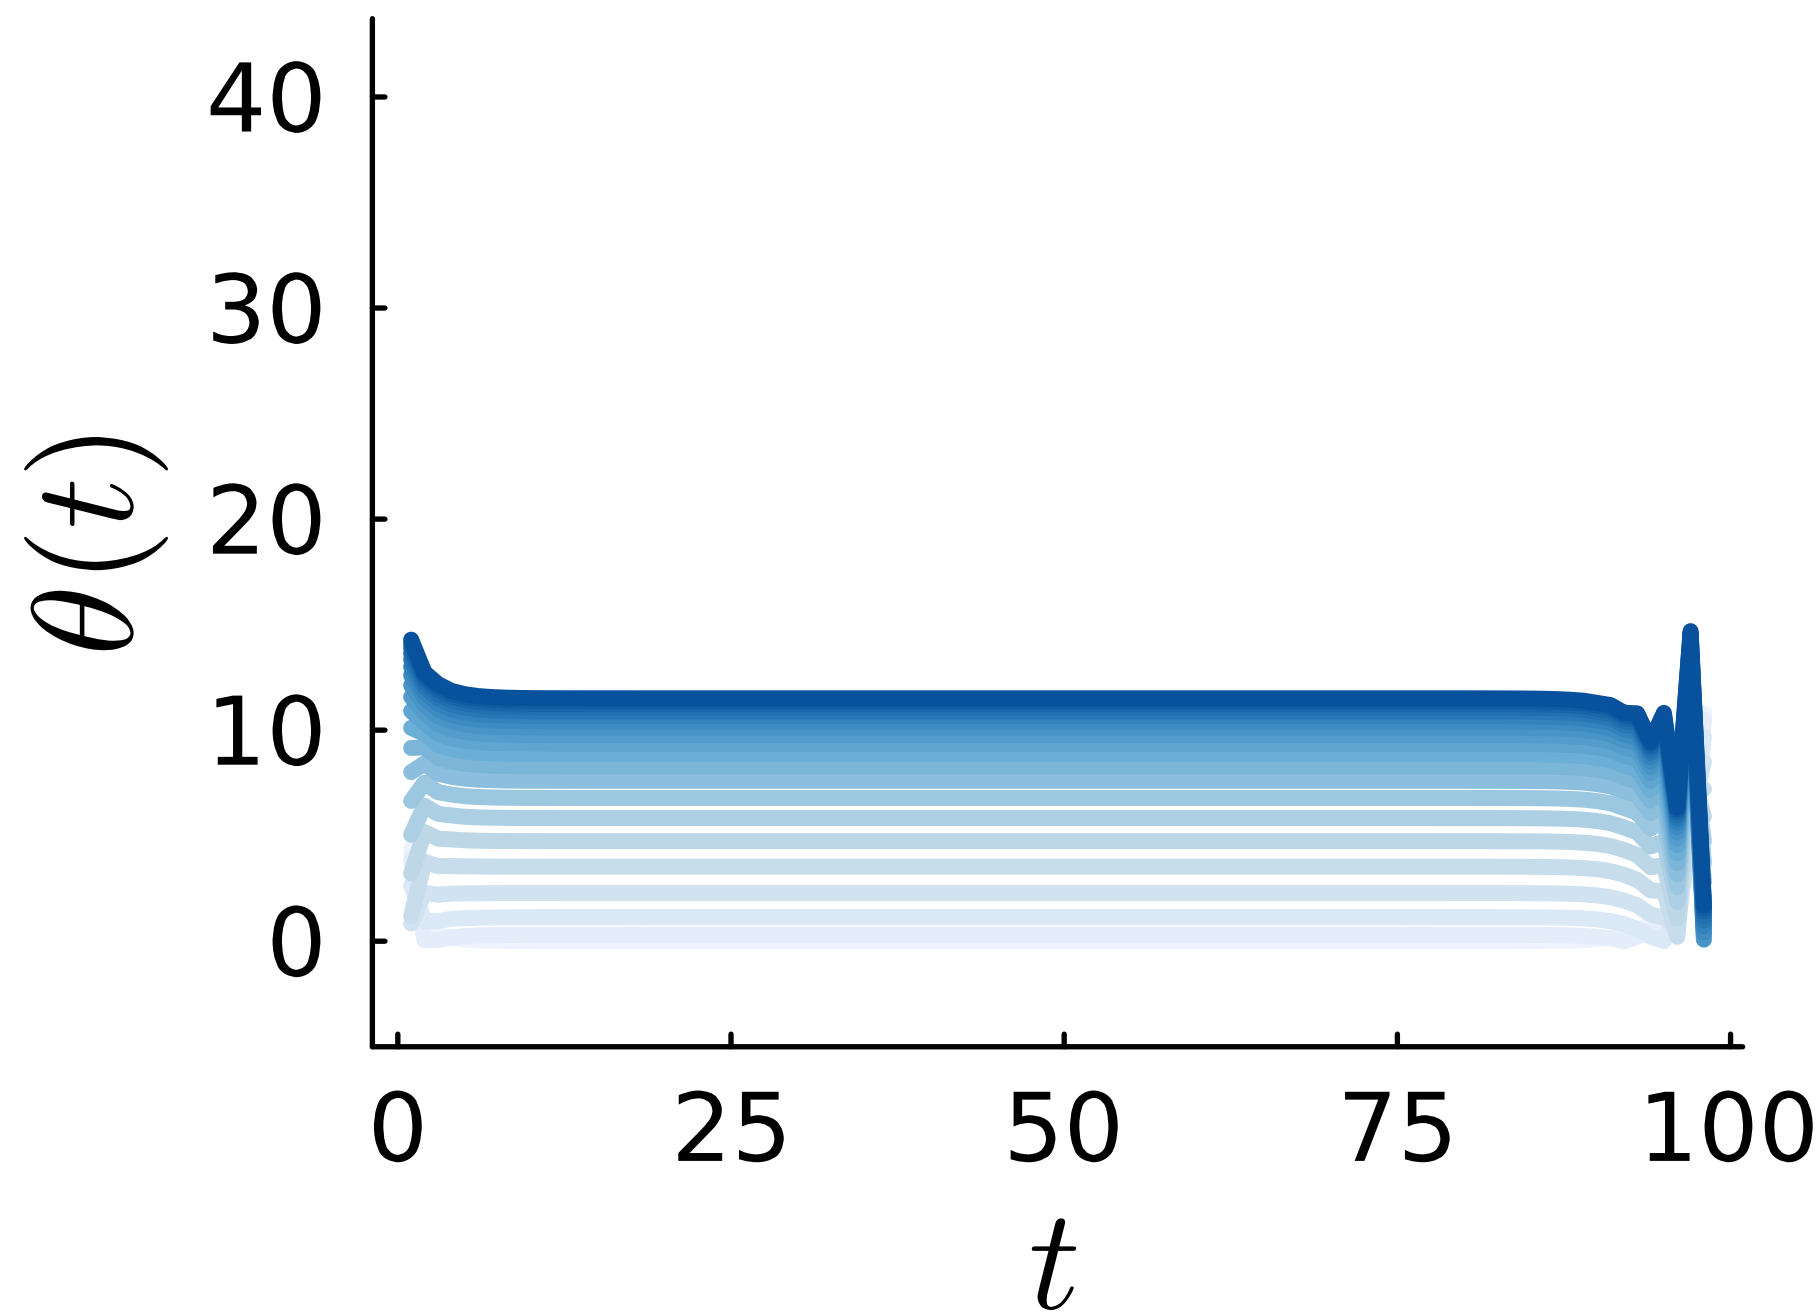

*GD*

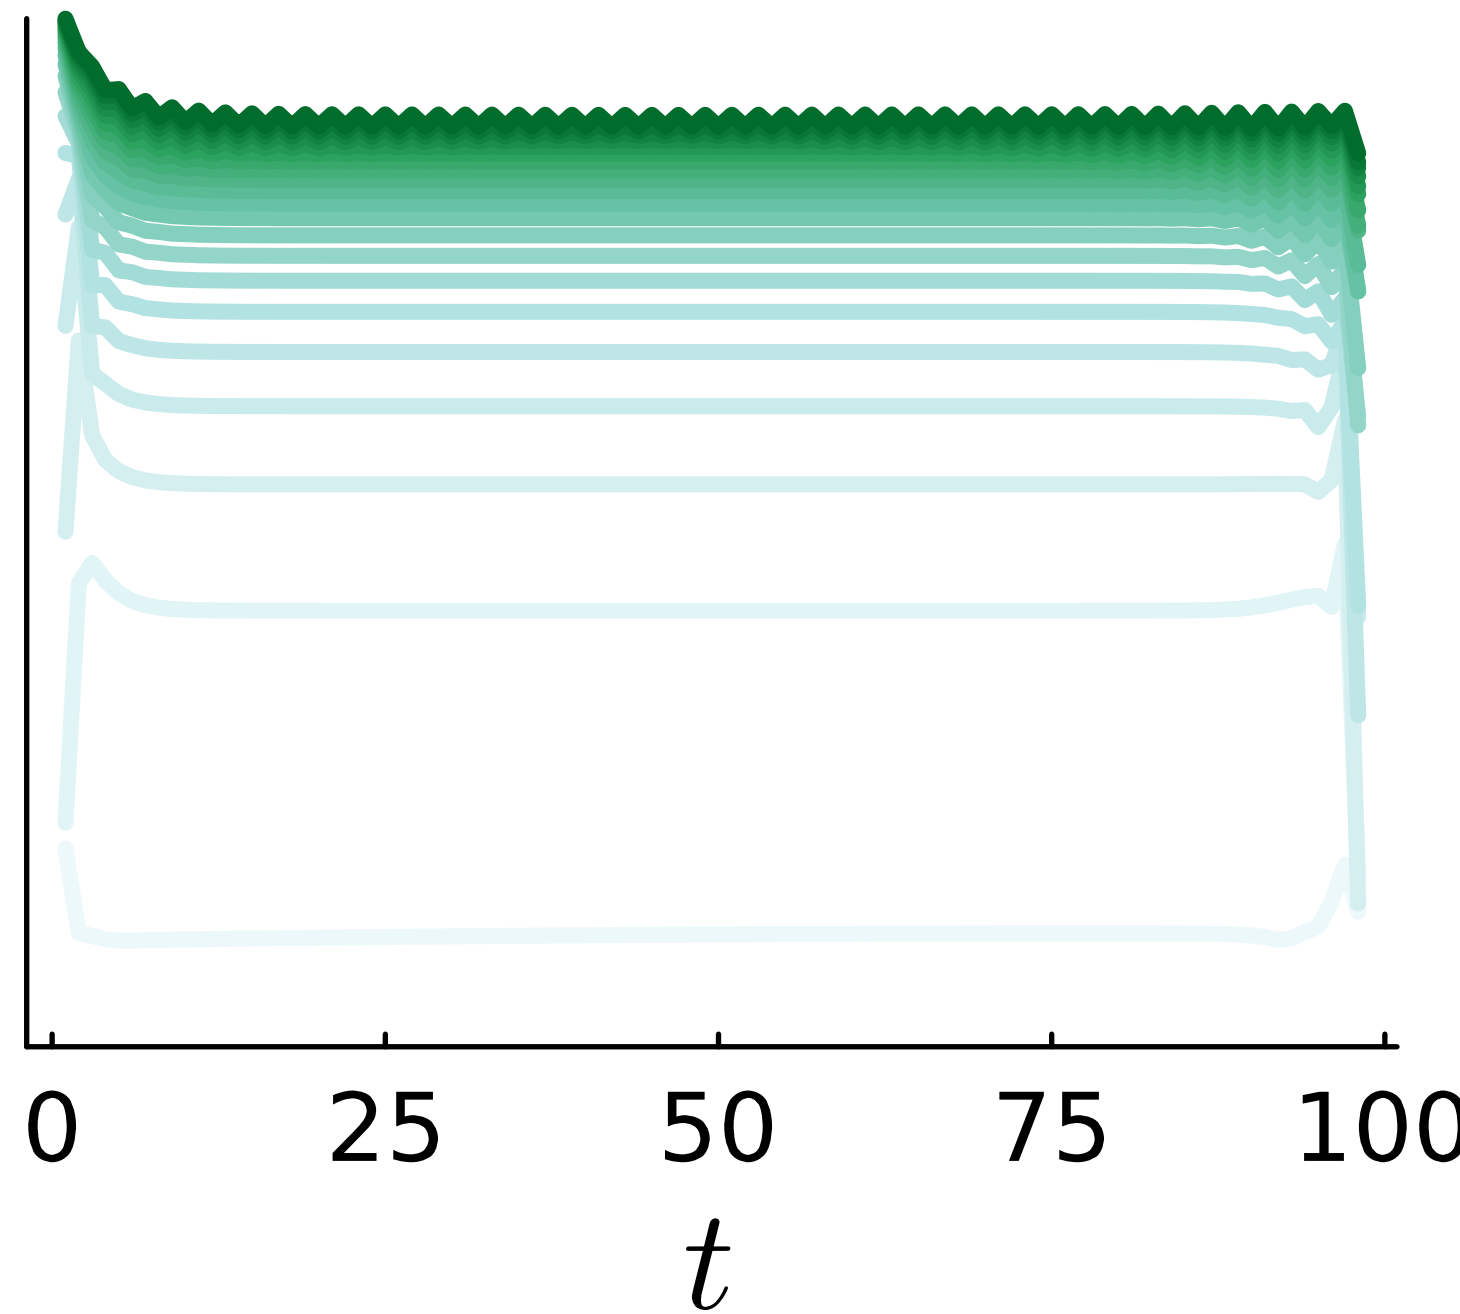

Supplement: supplementary_material [file attachment]

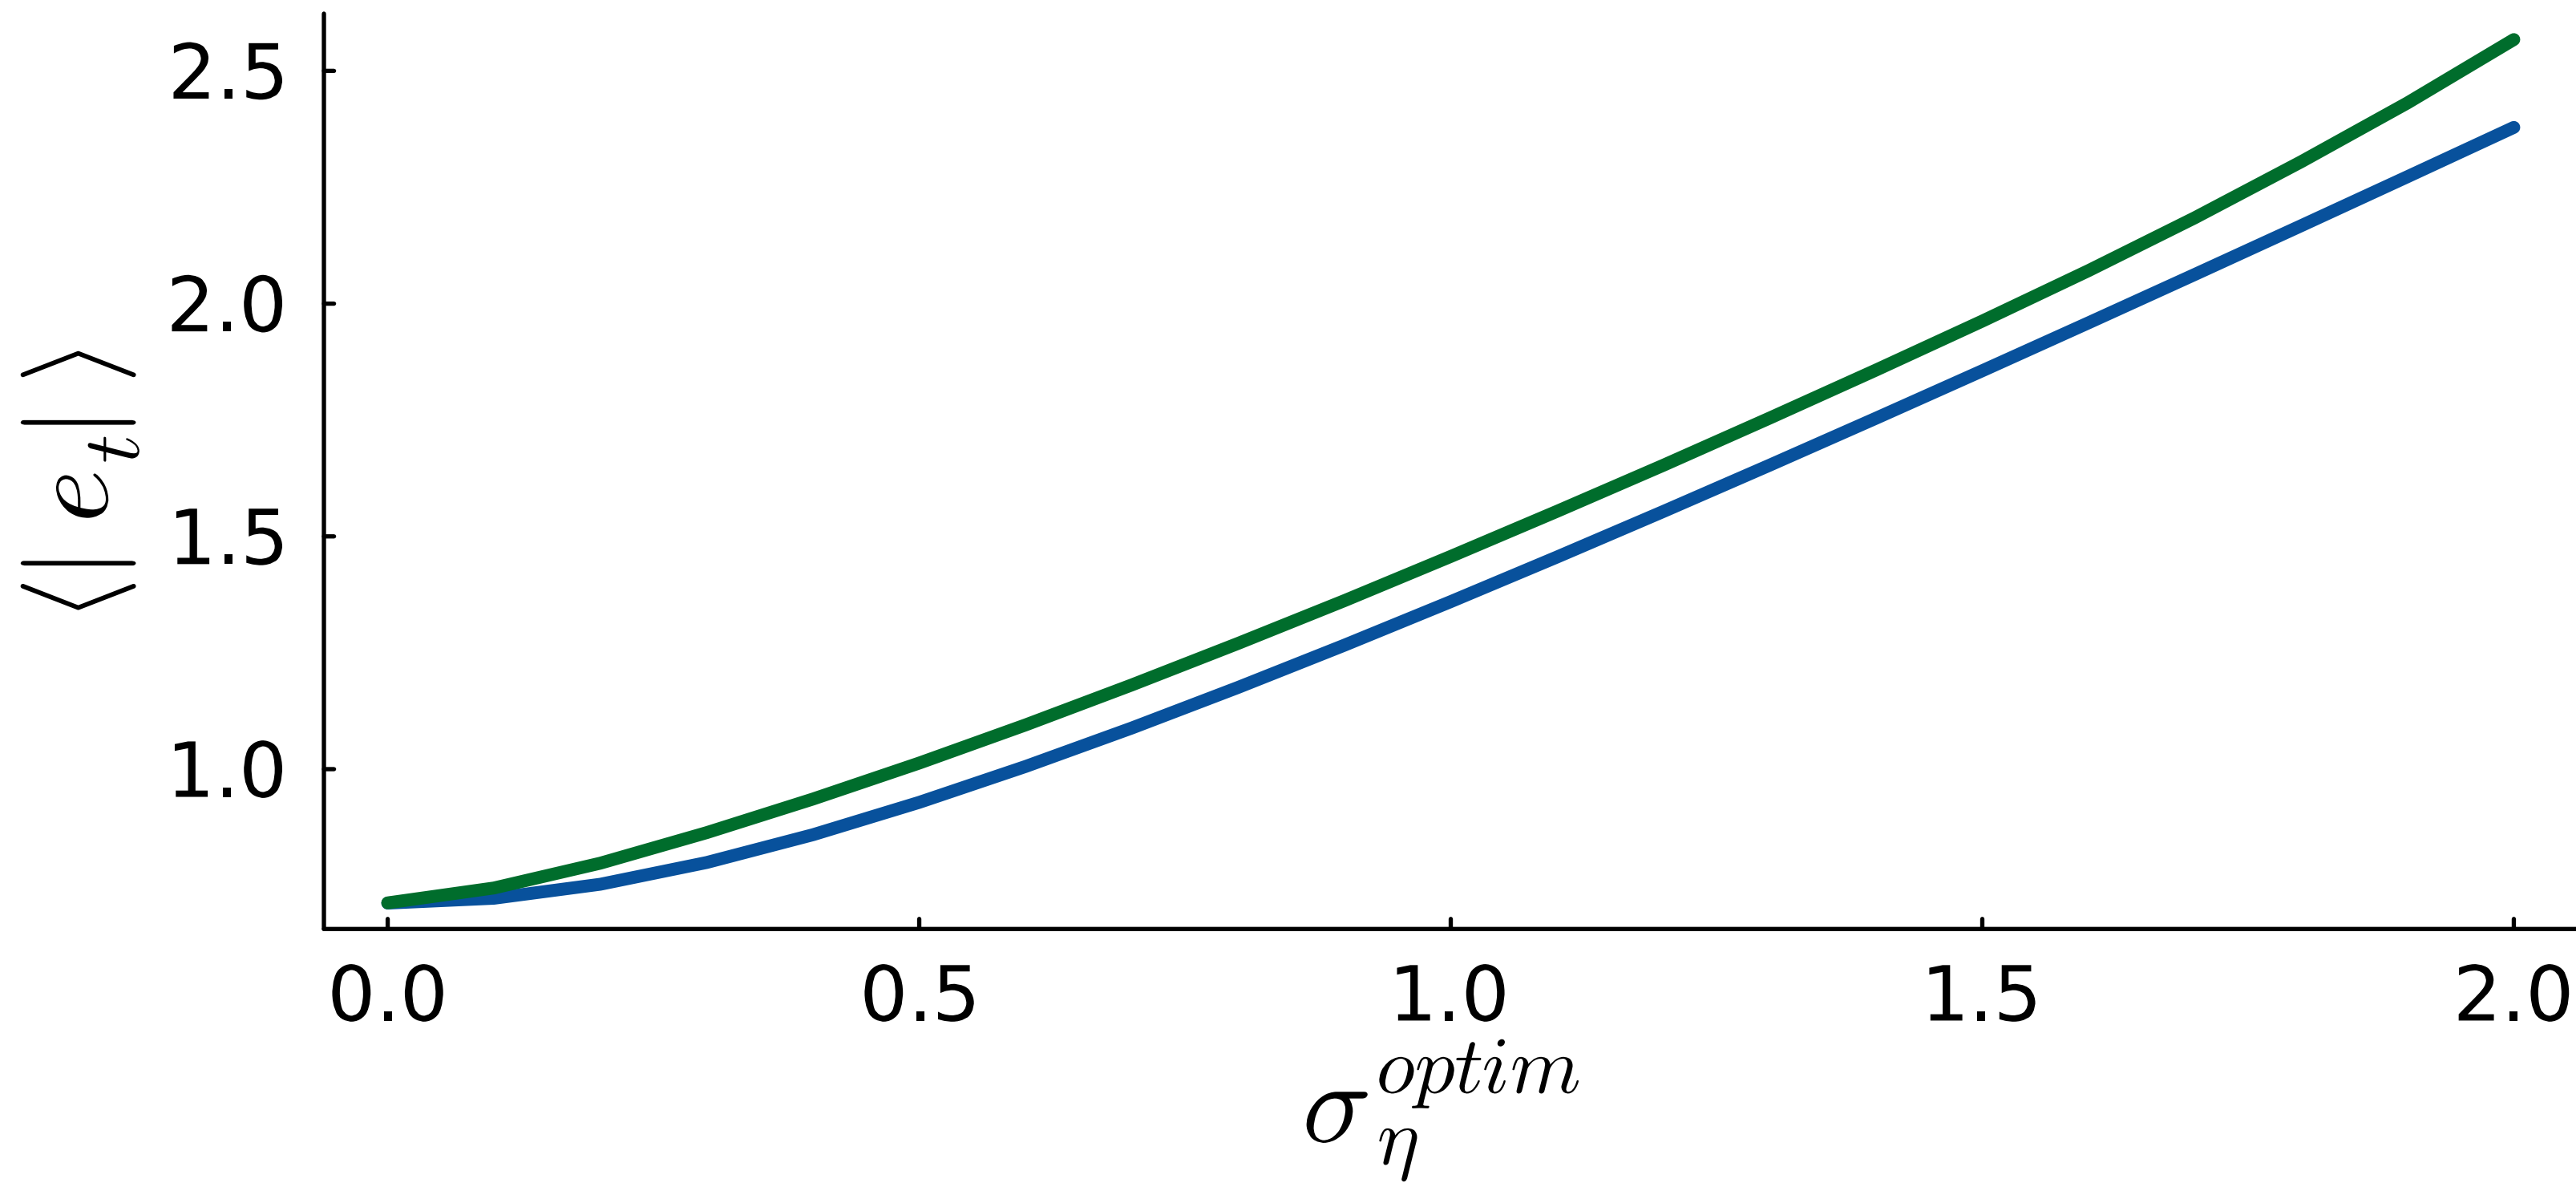

Supplement: supplementary_material [file attachment]

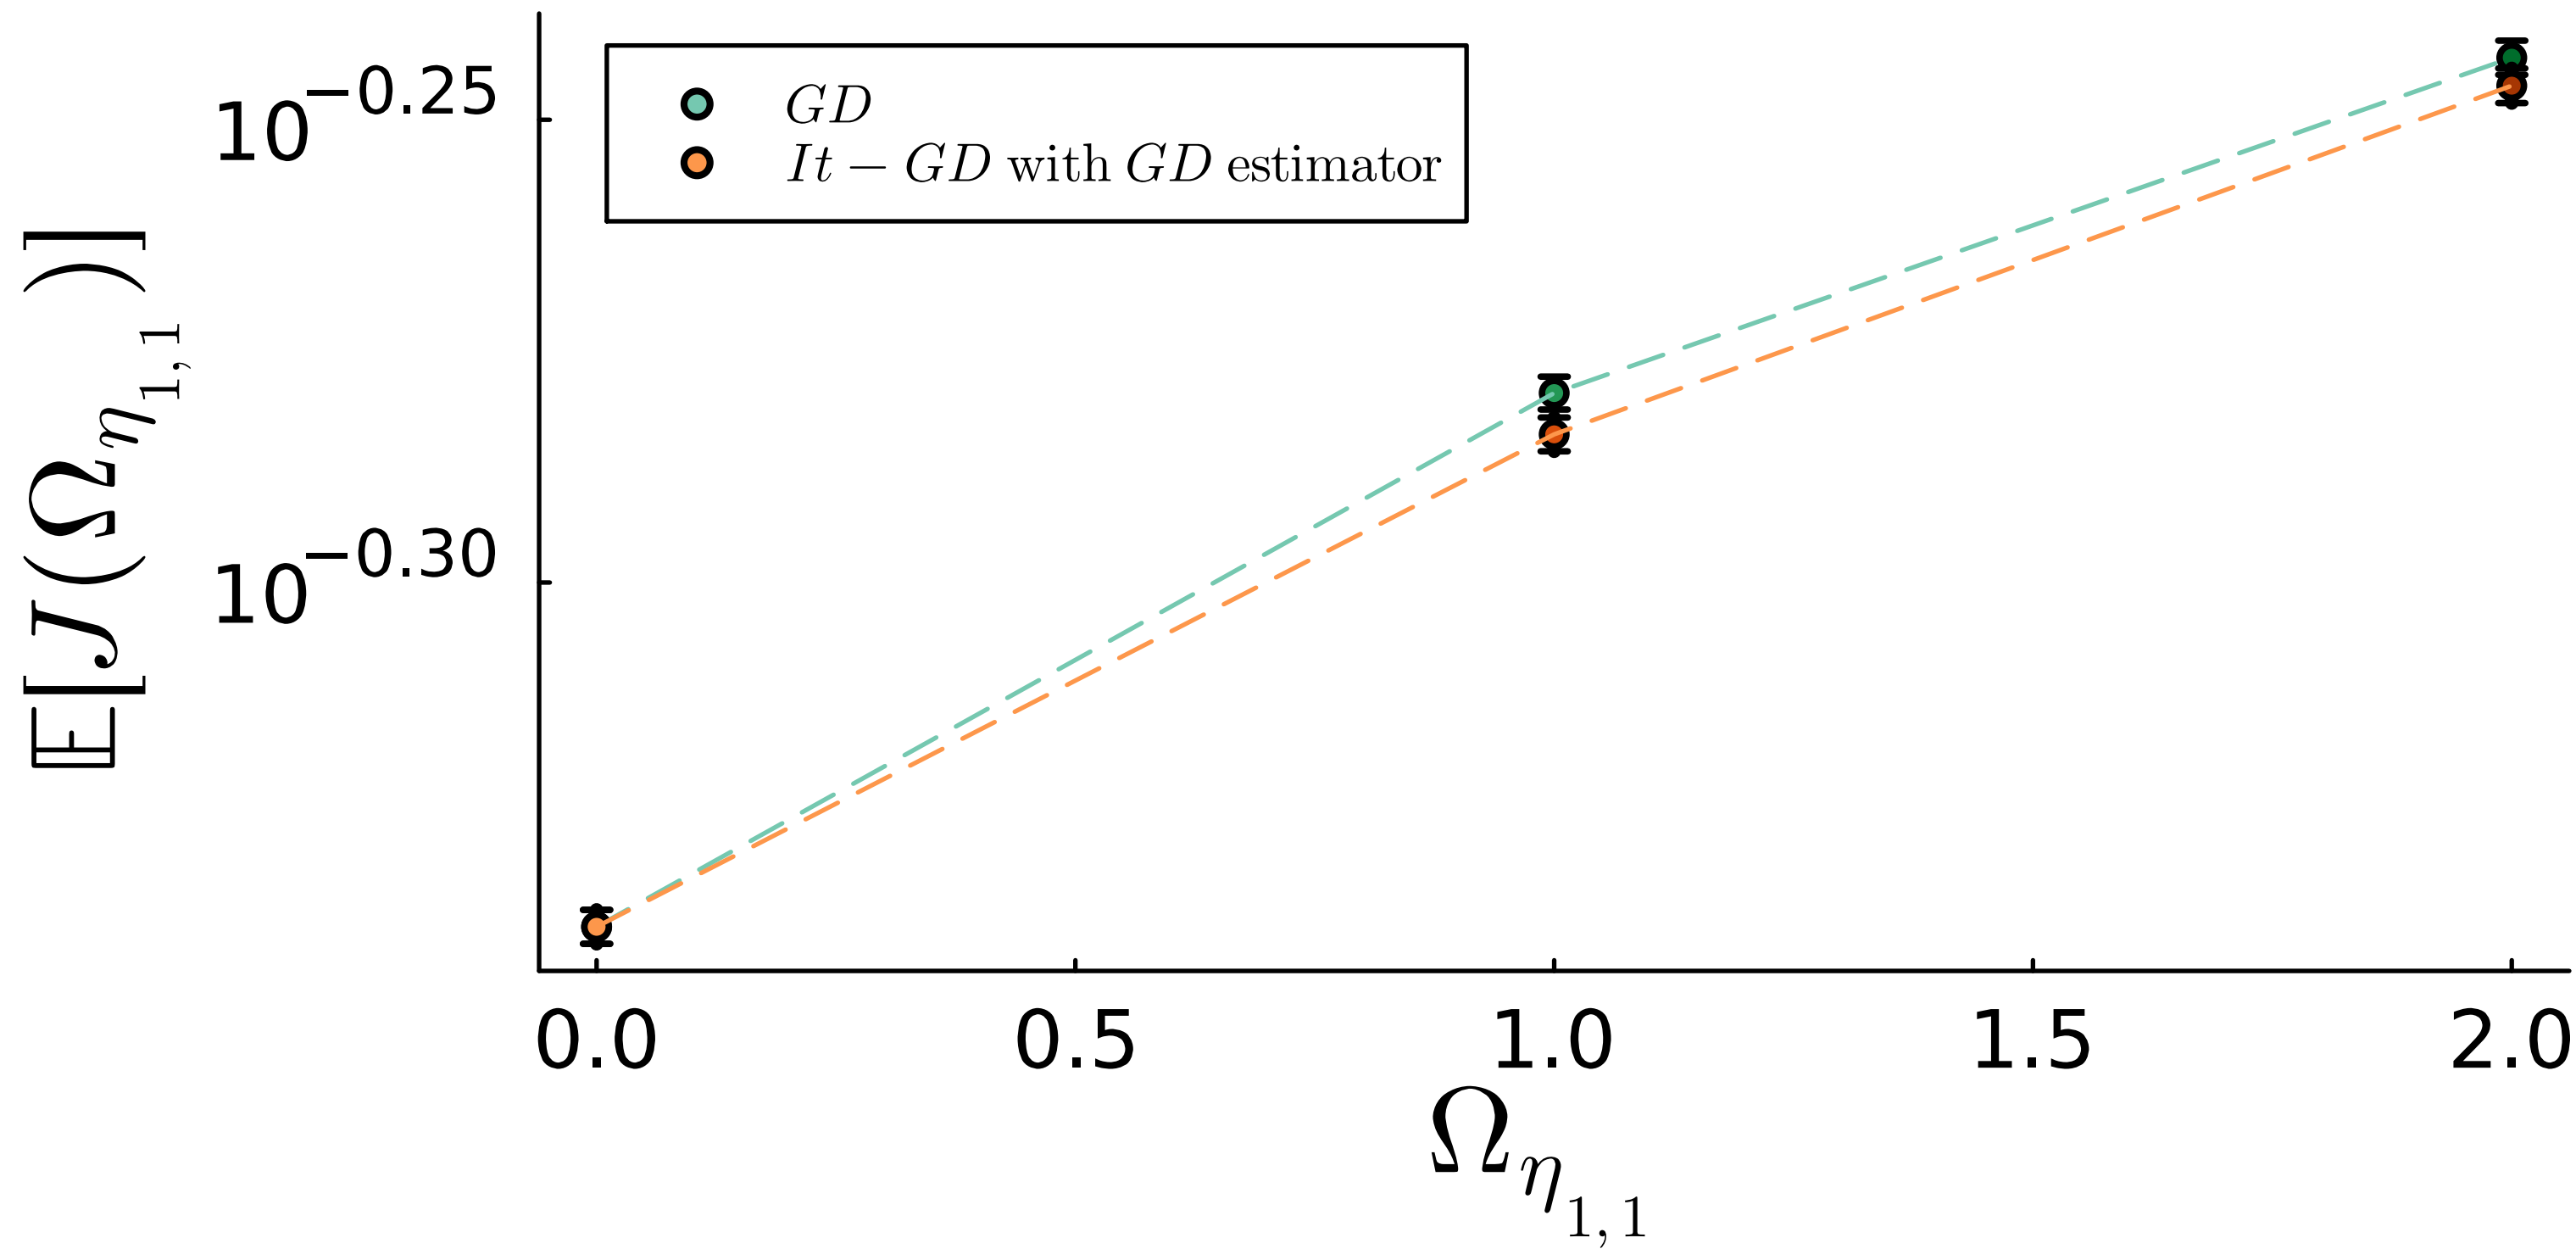

Supplement: supplementary_material [file attachment]

Iterative —  $GD$ 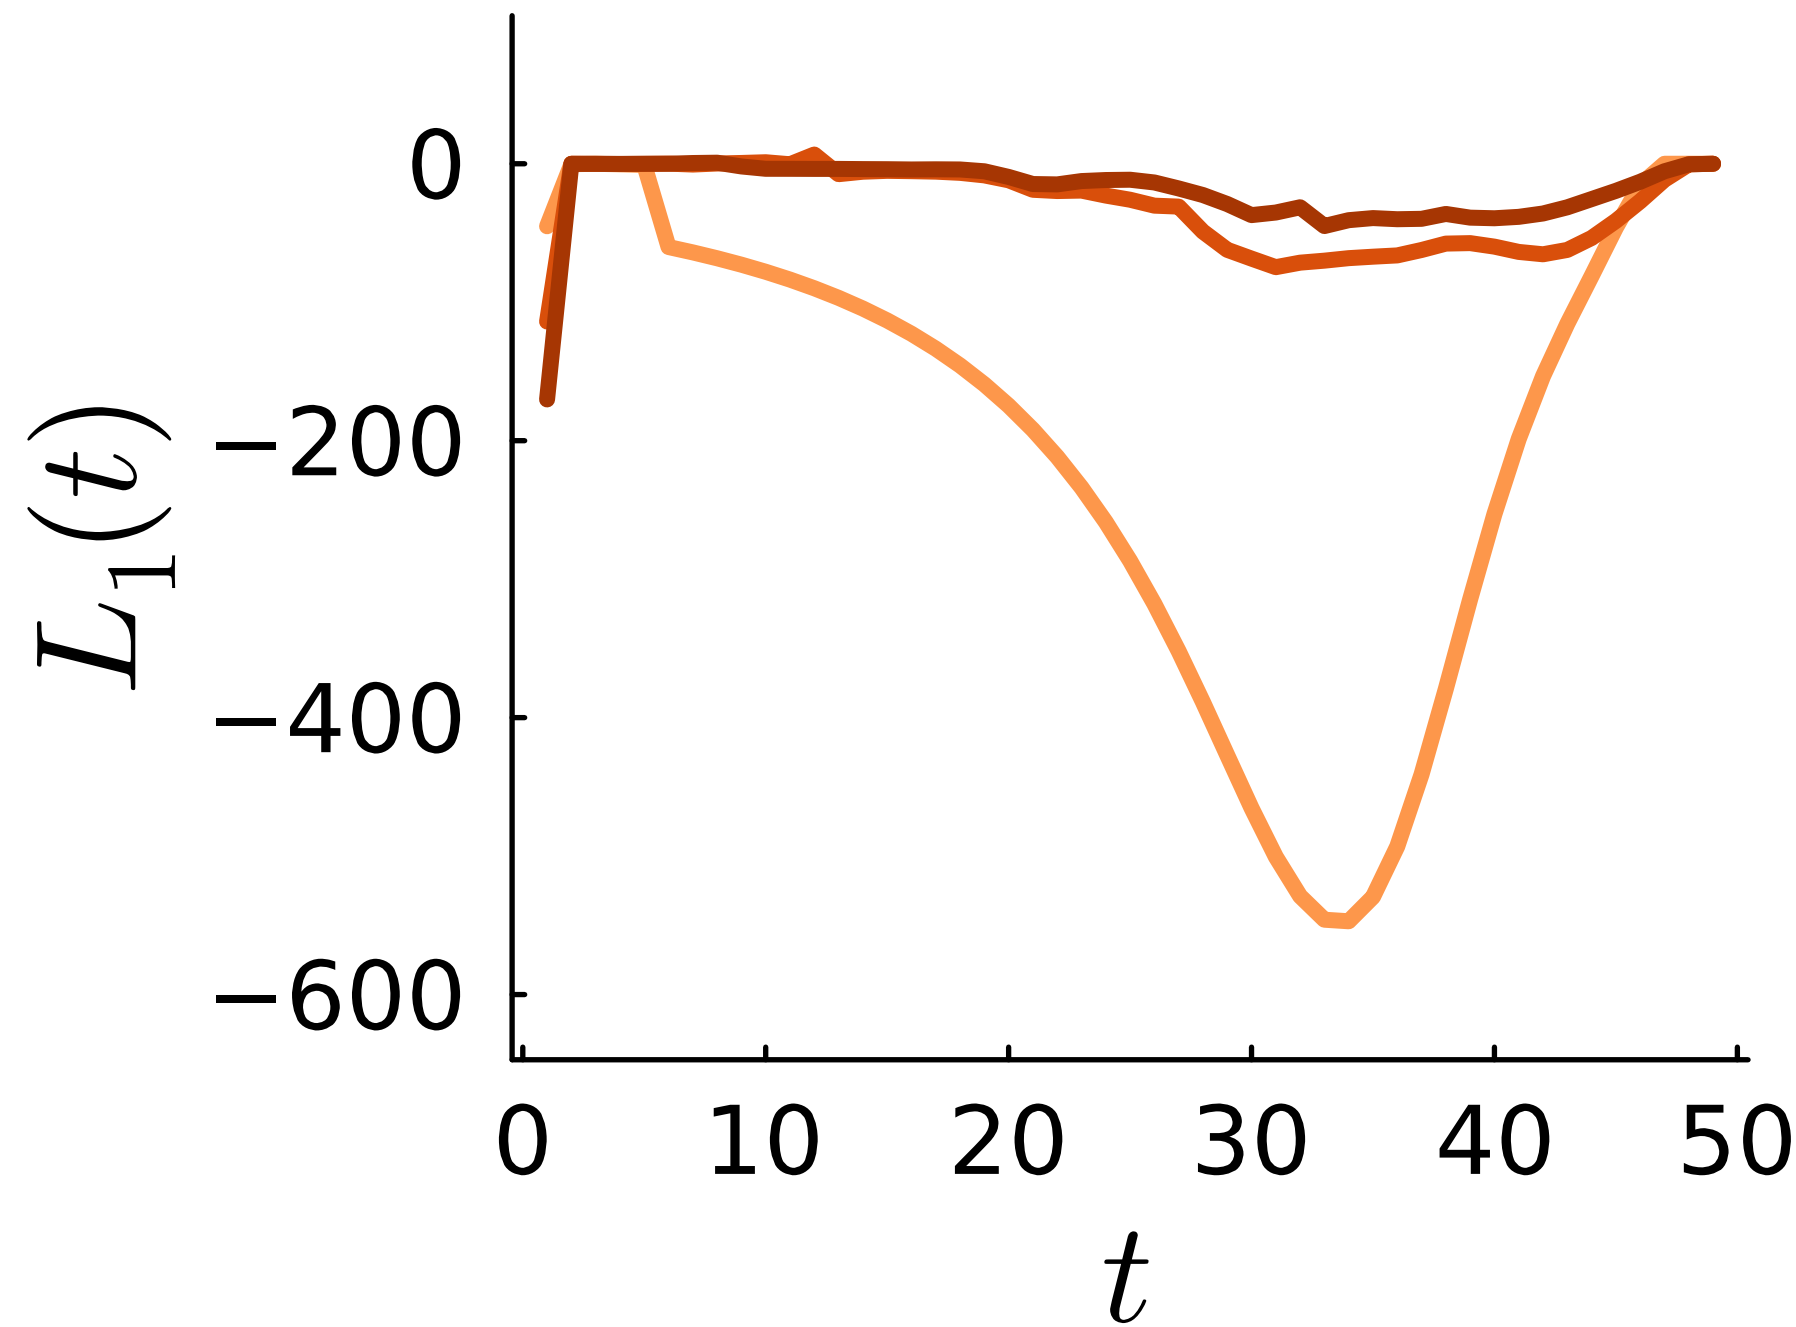 $GD$ 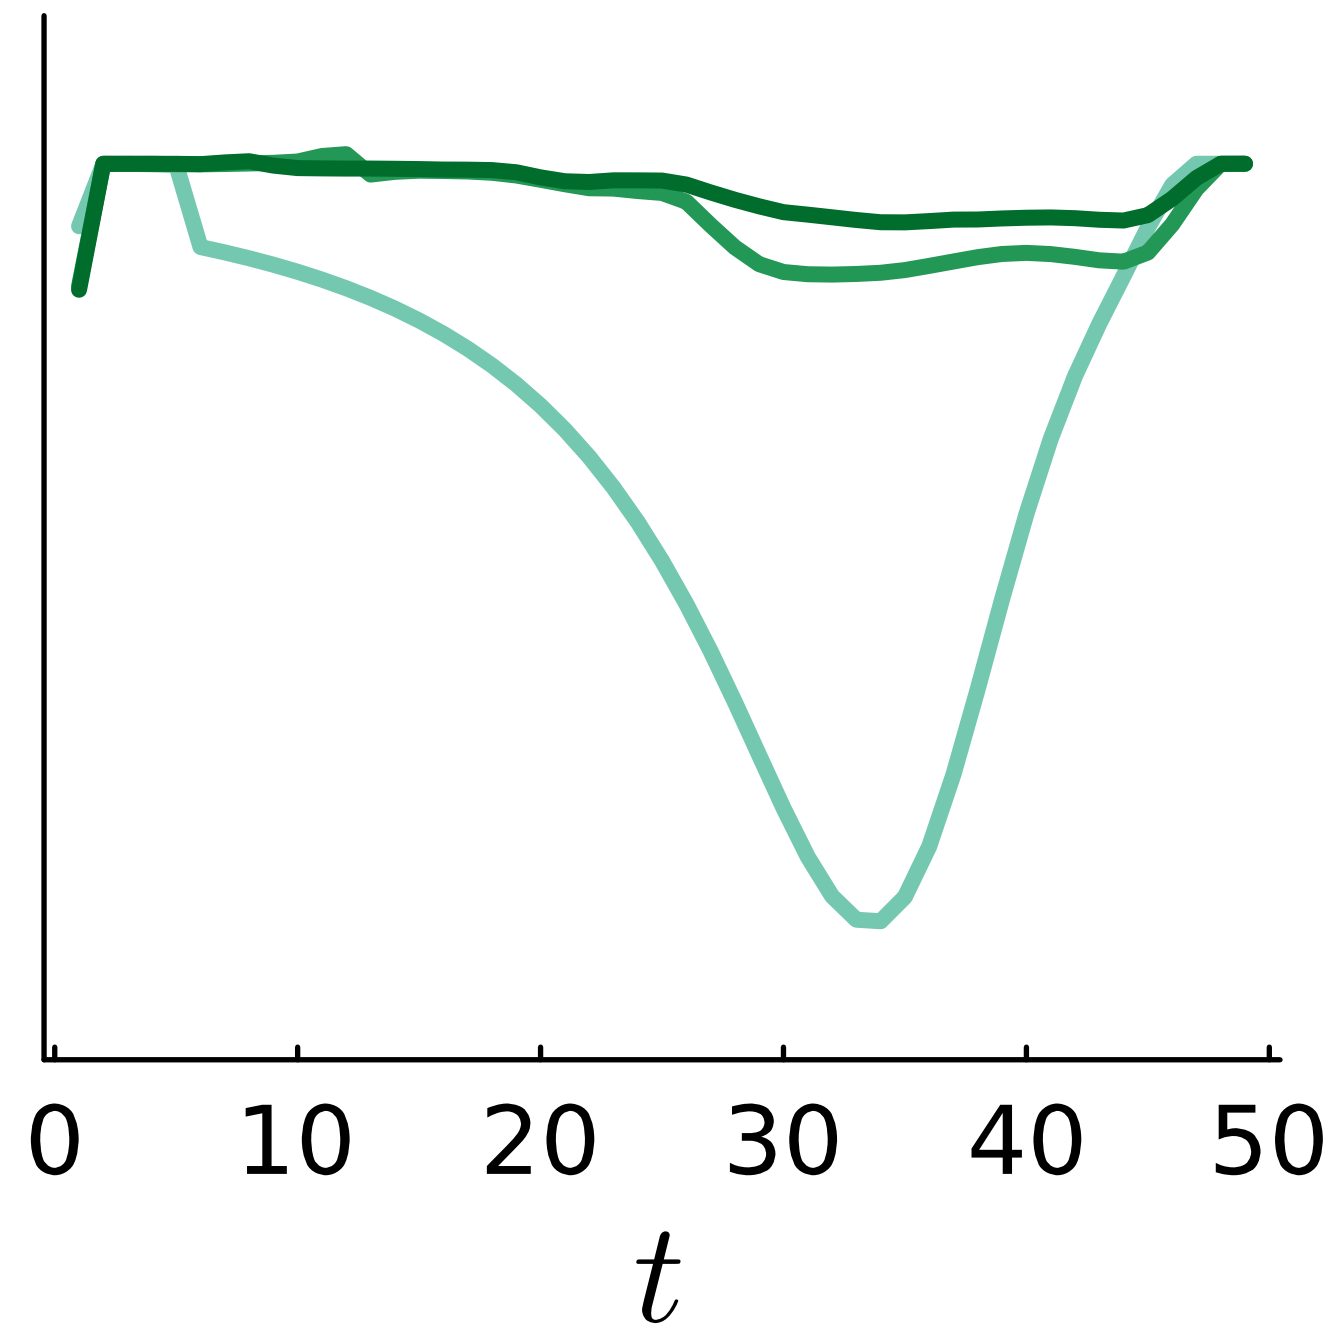

Supplement: supplementary_material [file attachment]

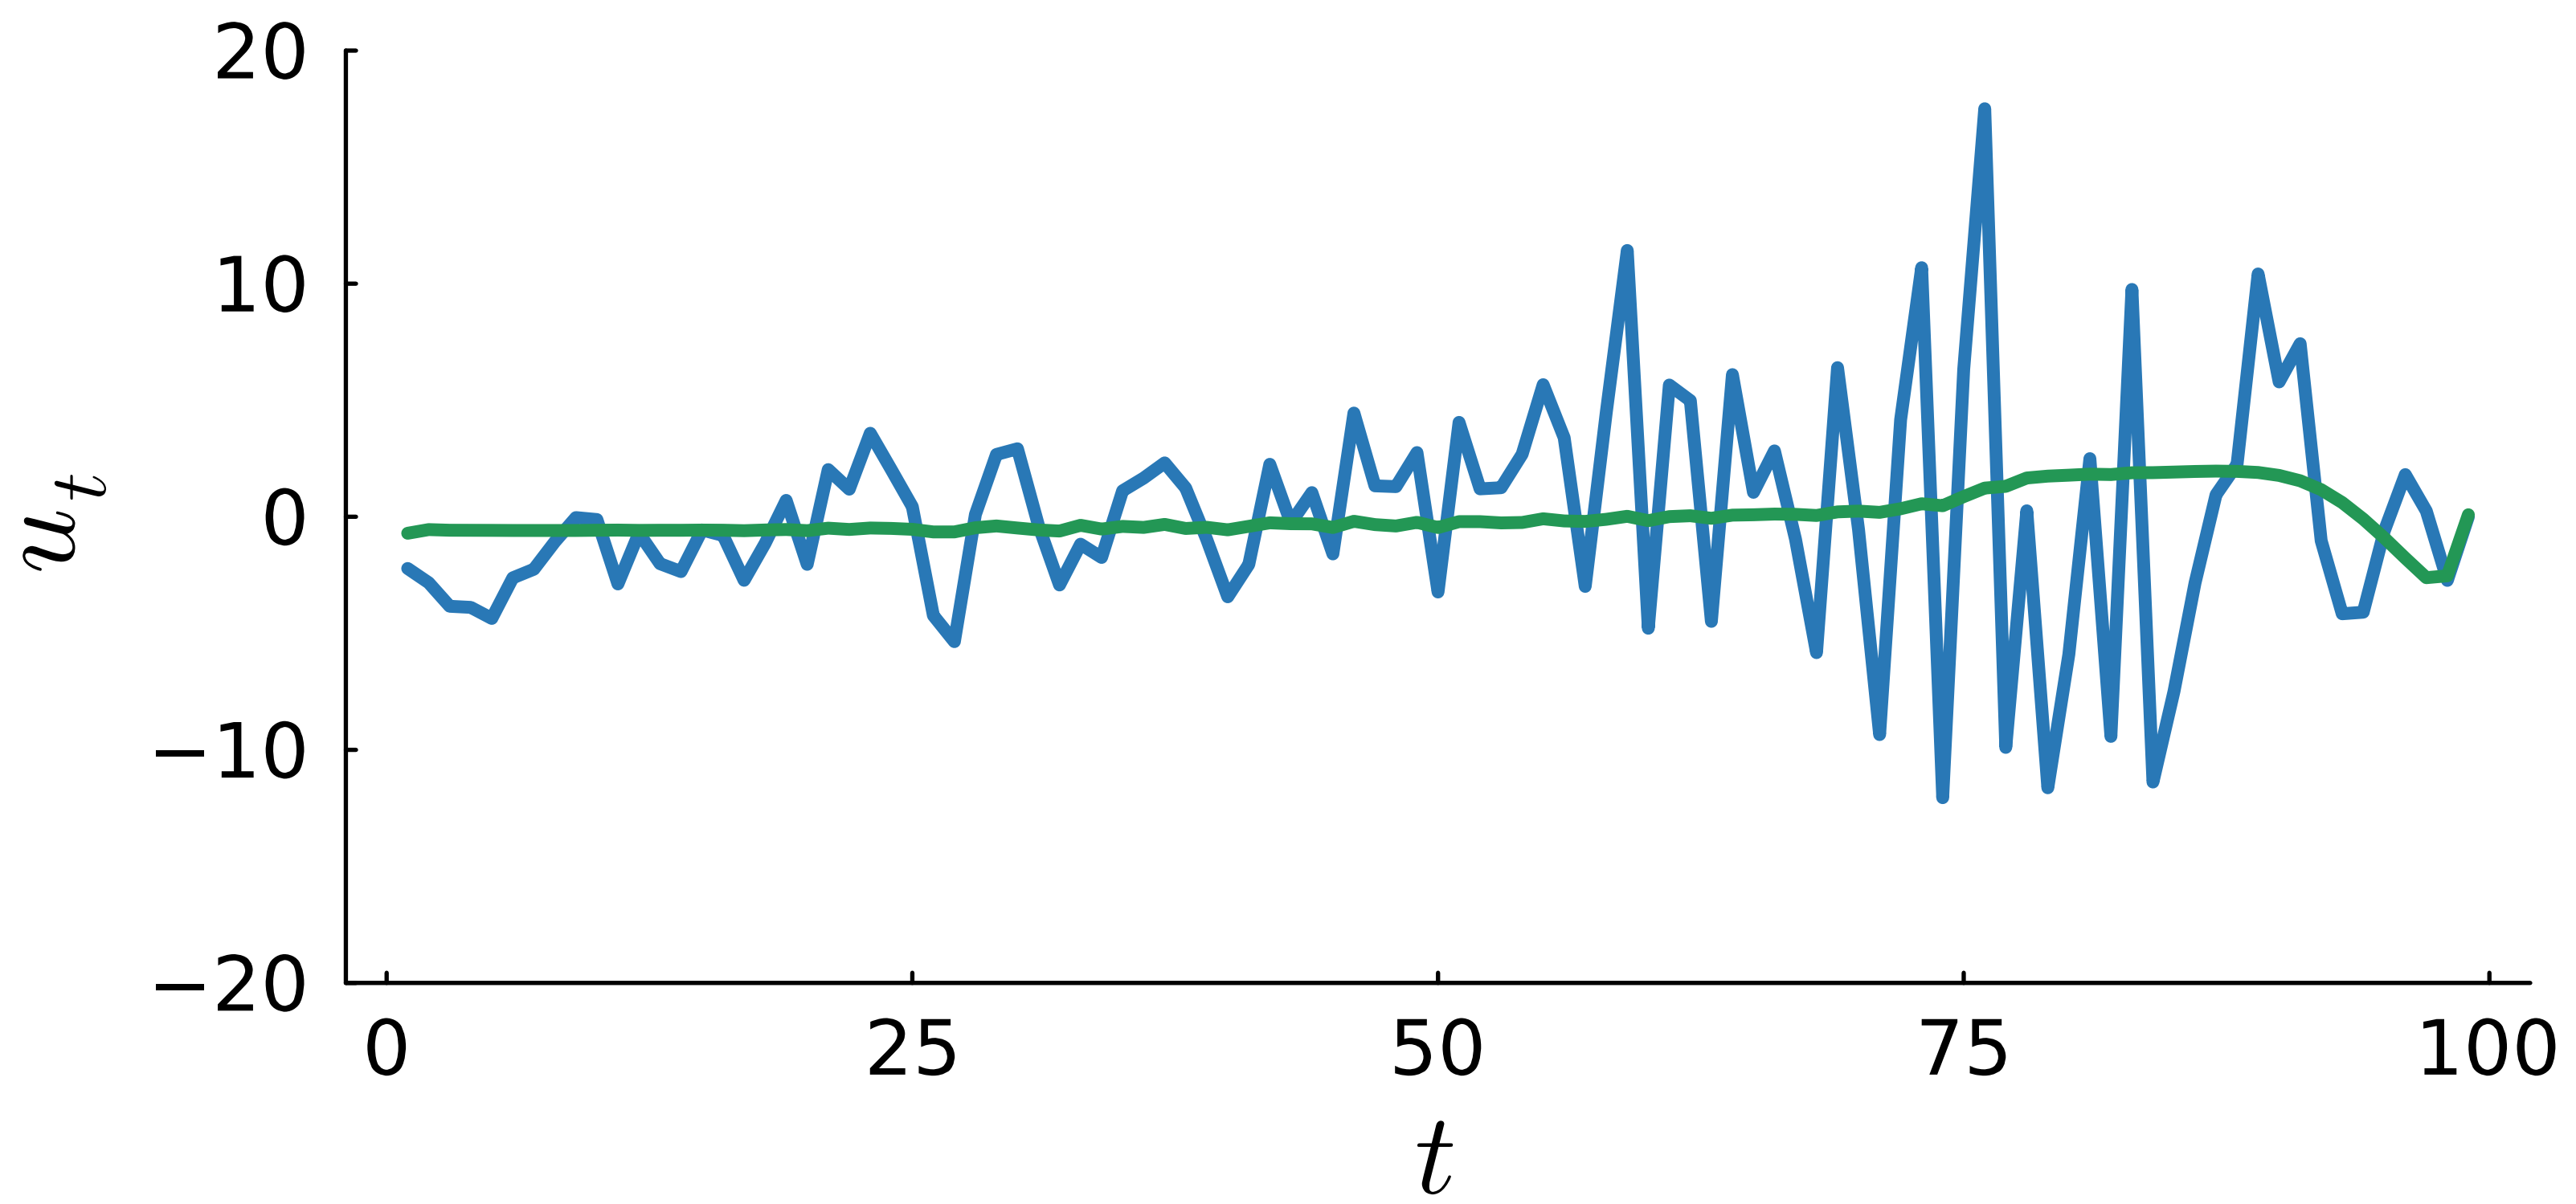

Supplement: supplementary_material [file attachment]

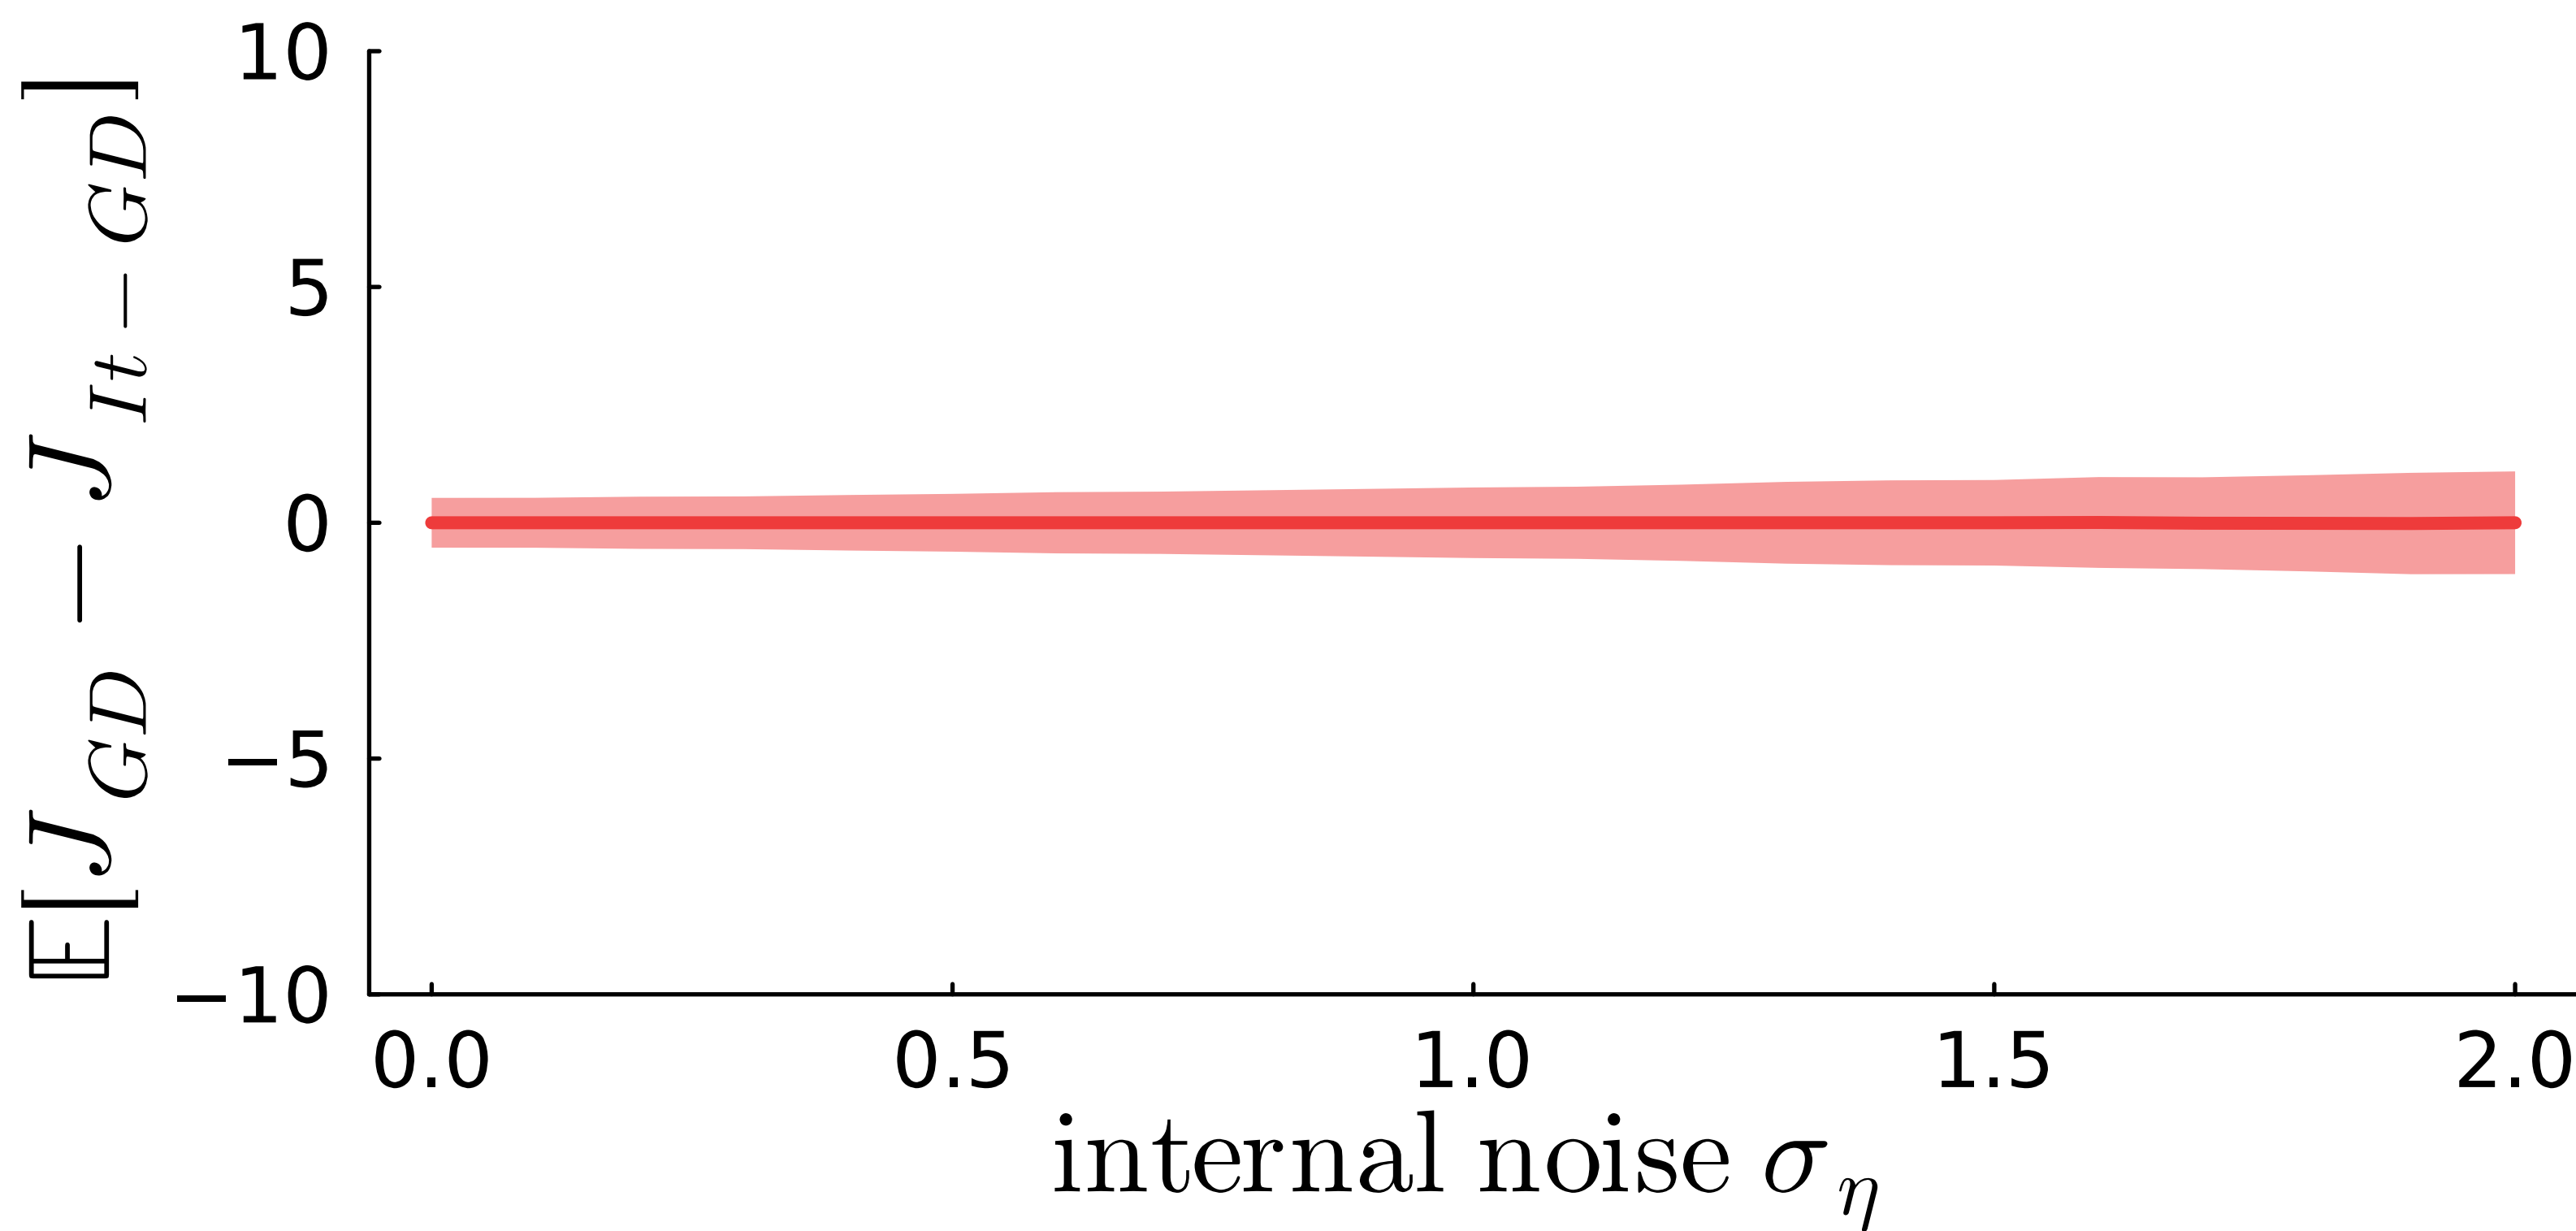

Supplement: supplementary_material [file attachment]

$TOD$

$GD$

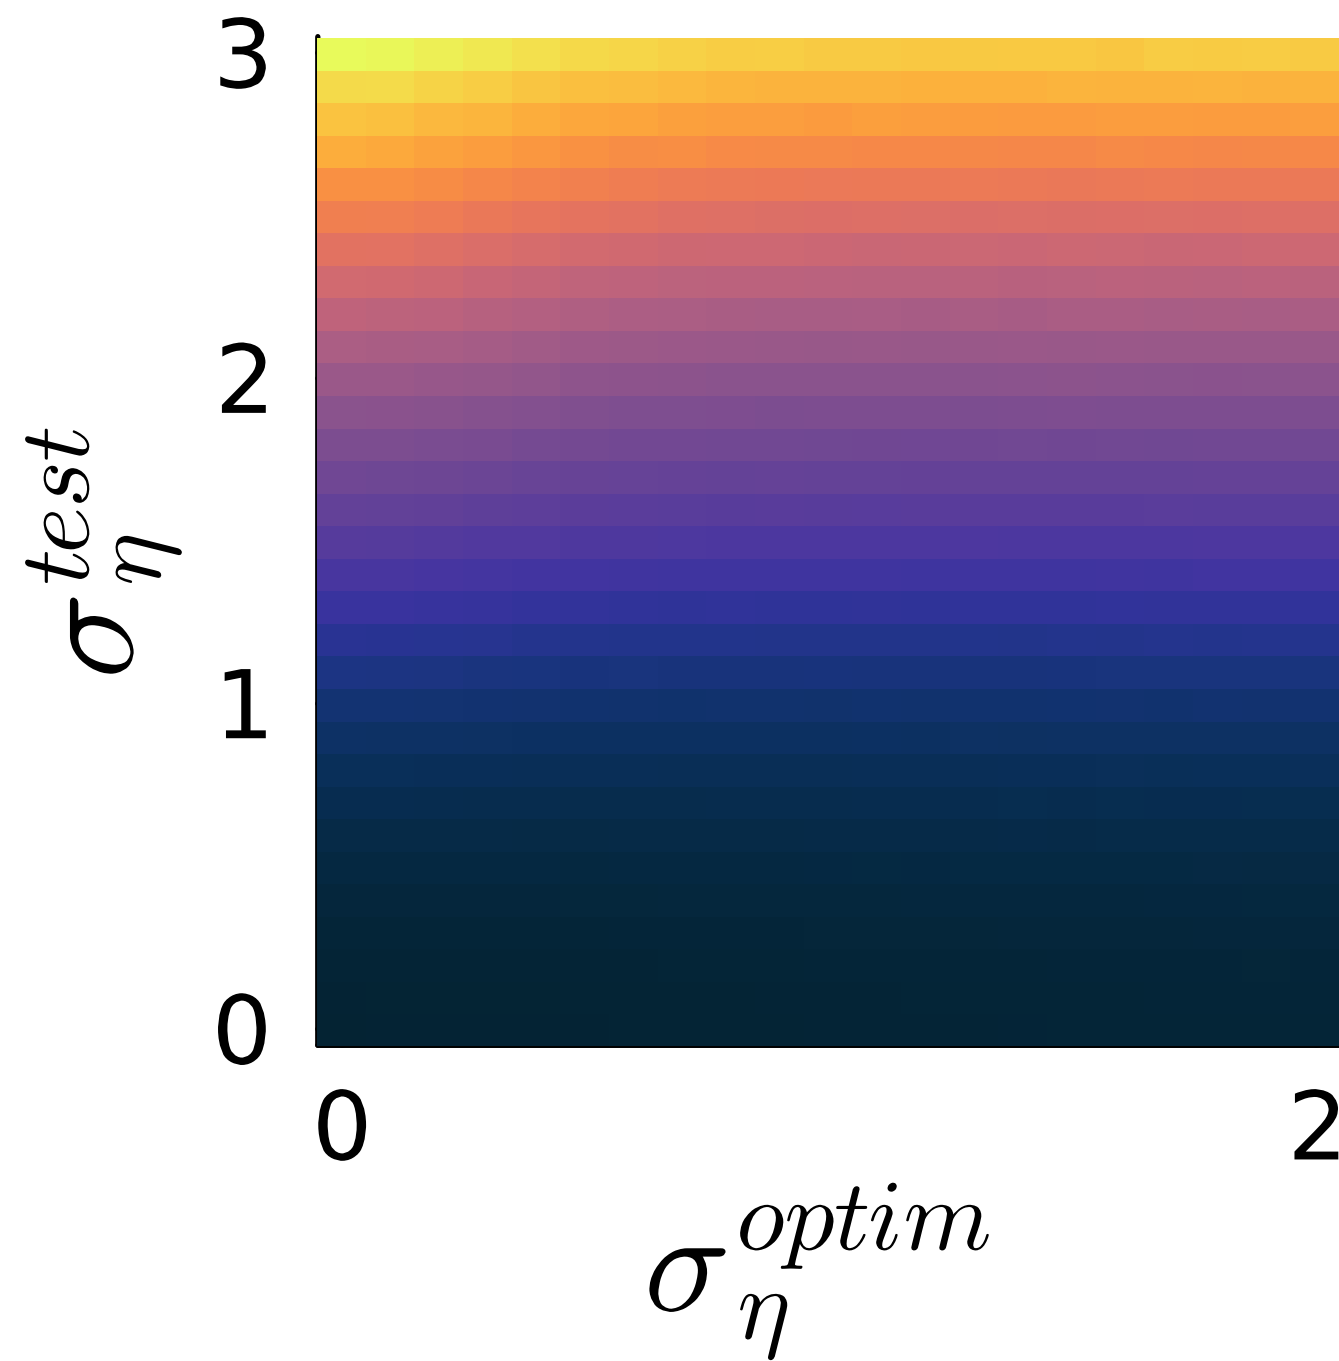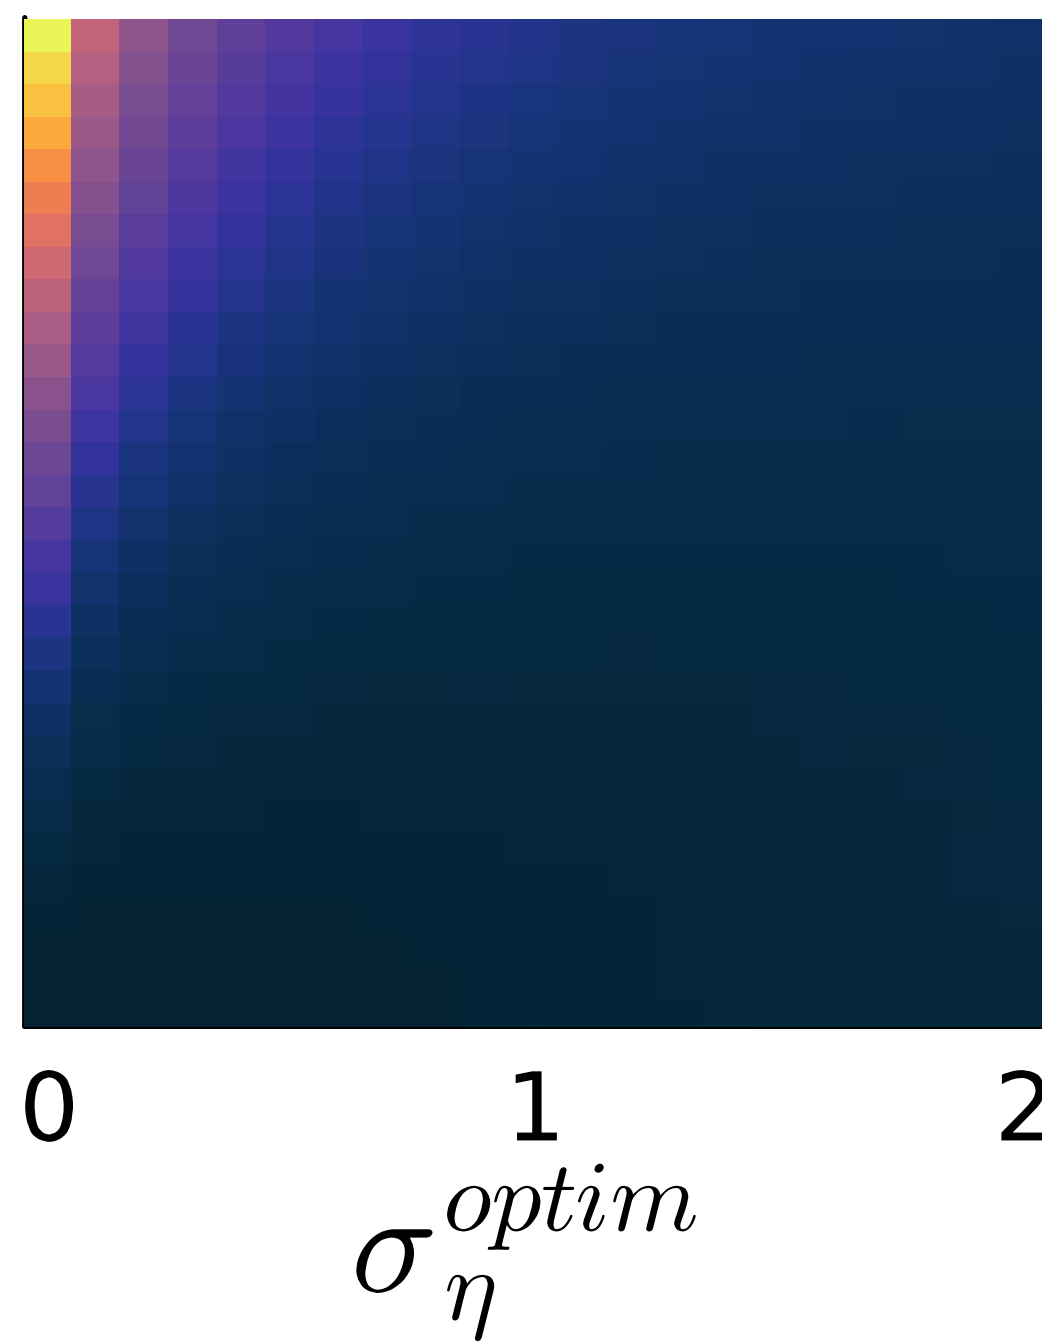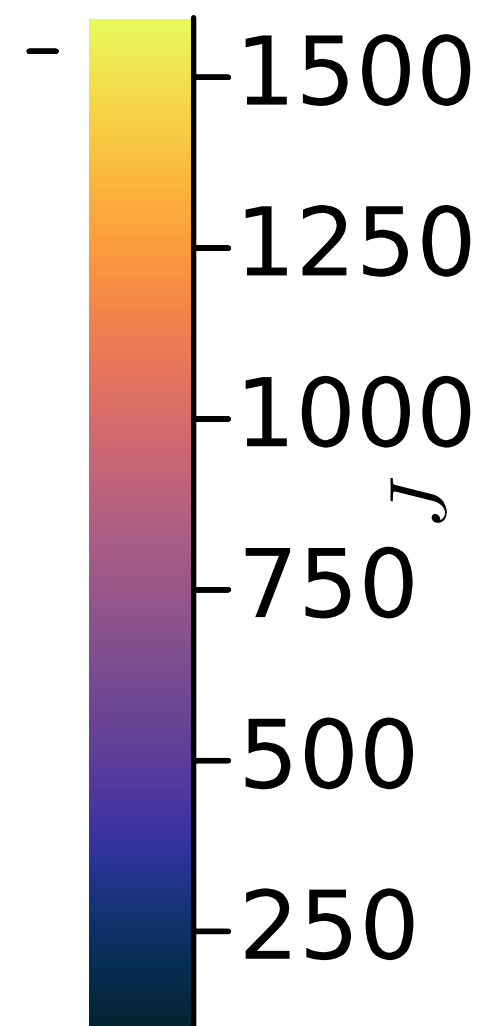

Supplement: supplementary_material [file attachment]

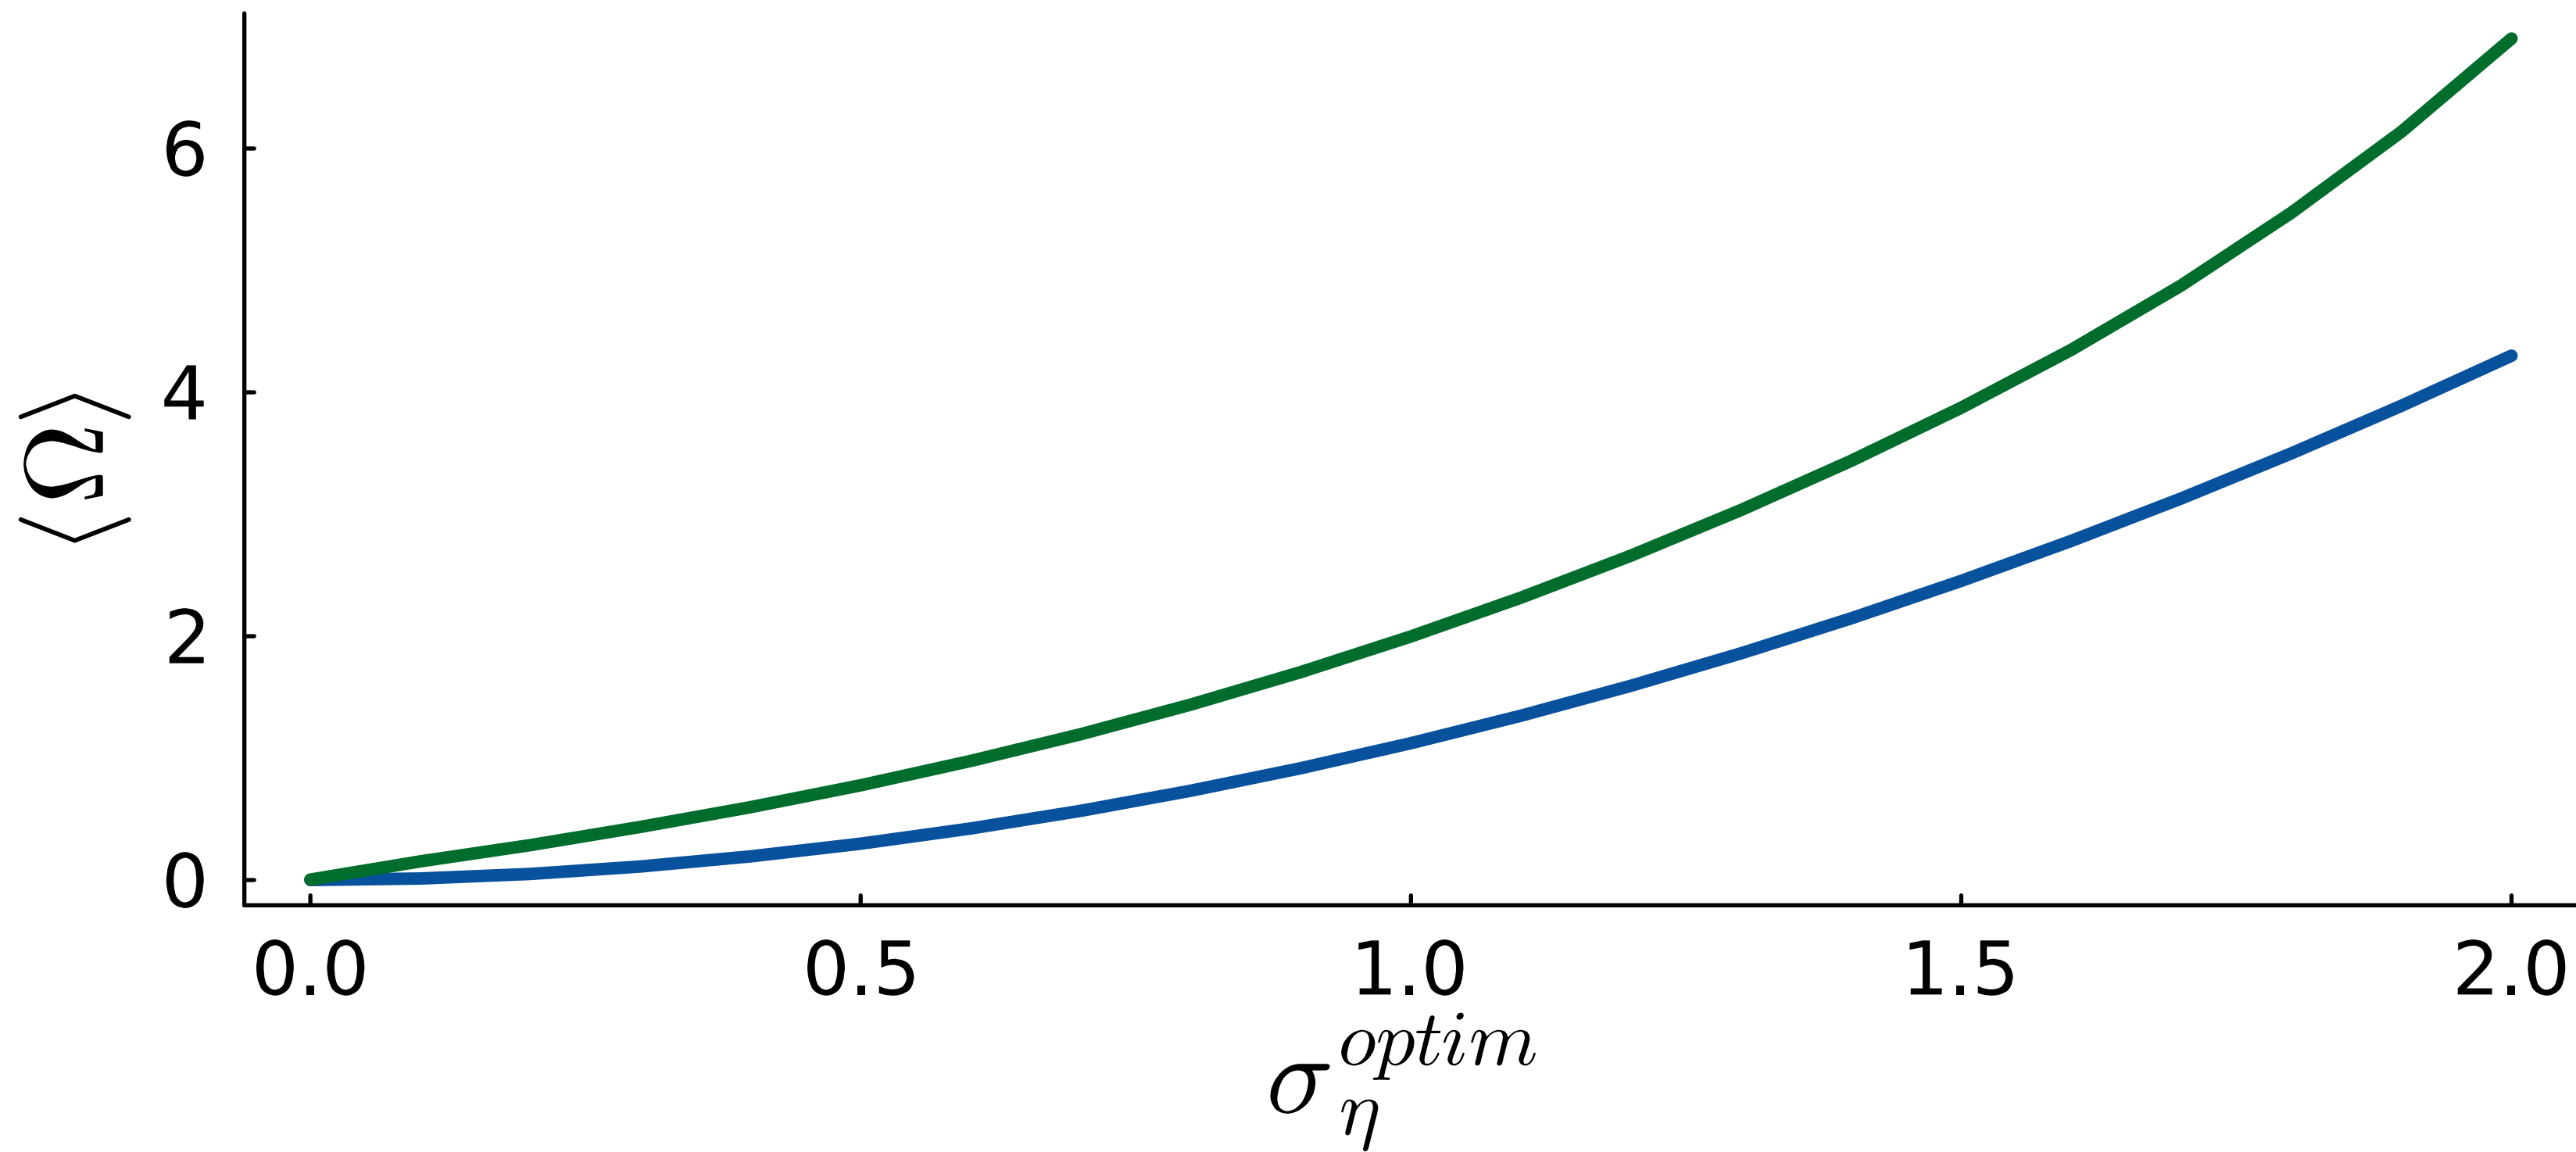

Supplement: supplementary_material [file attachment]

*TOD*

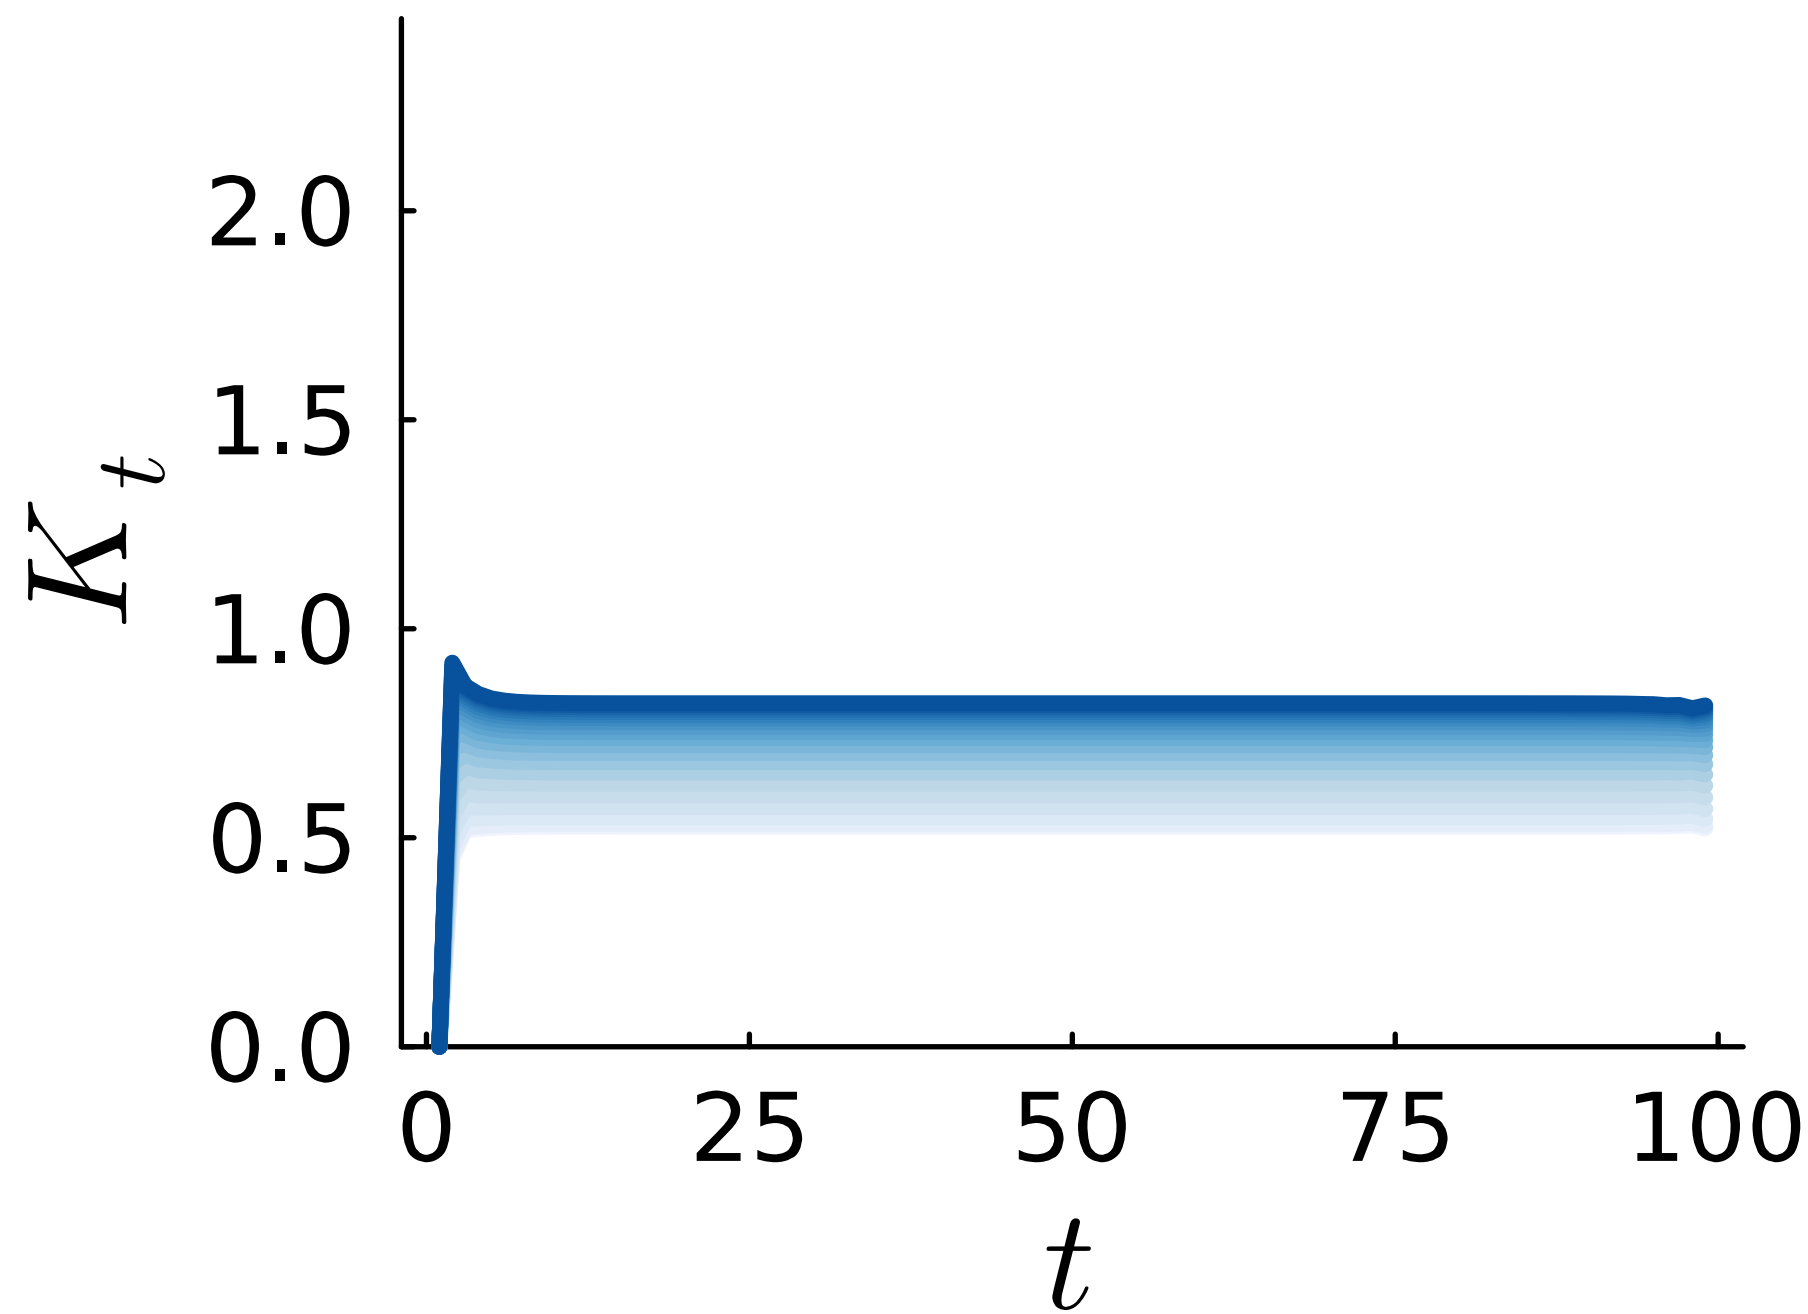

*GD*

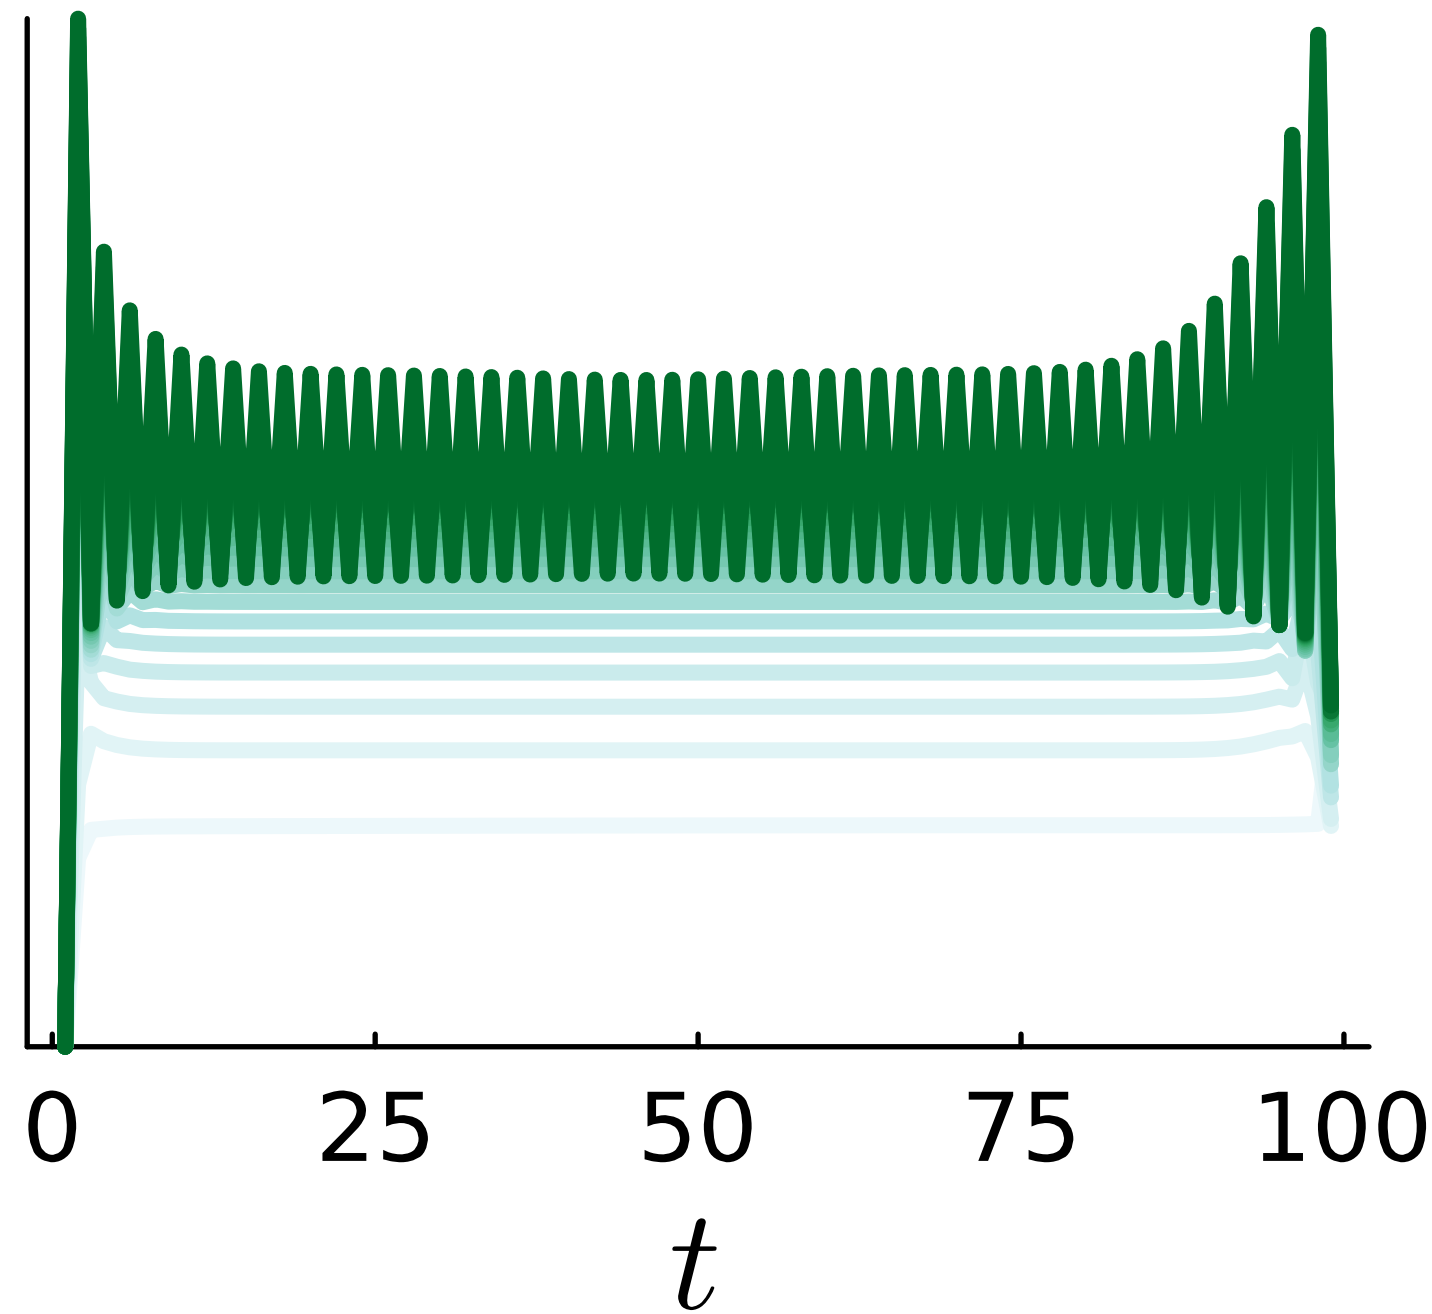

Supplement: supplementary_material [file attachment]

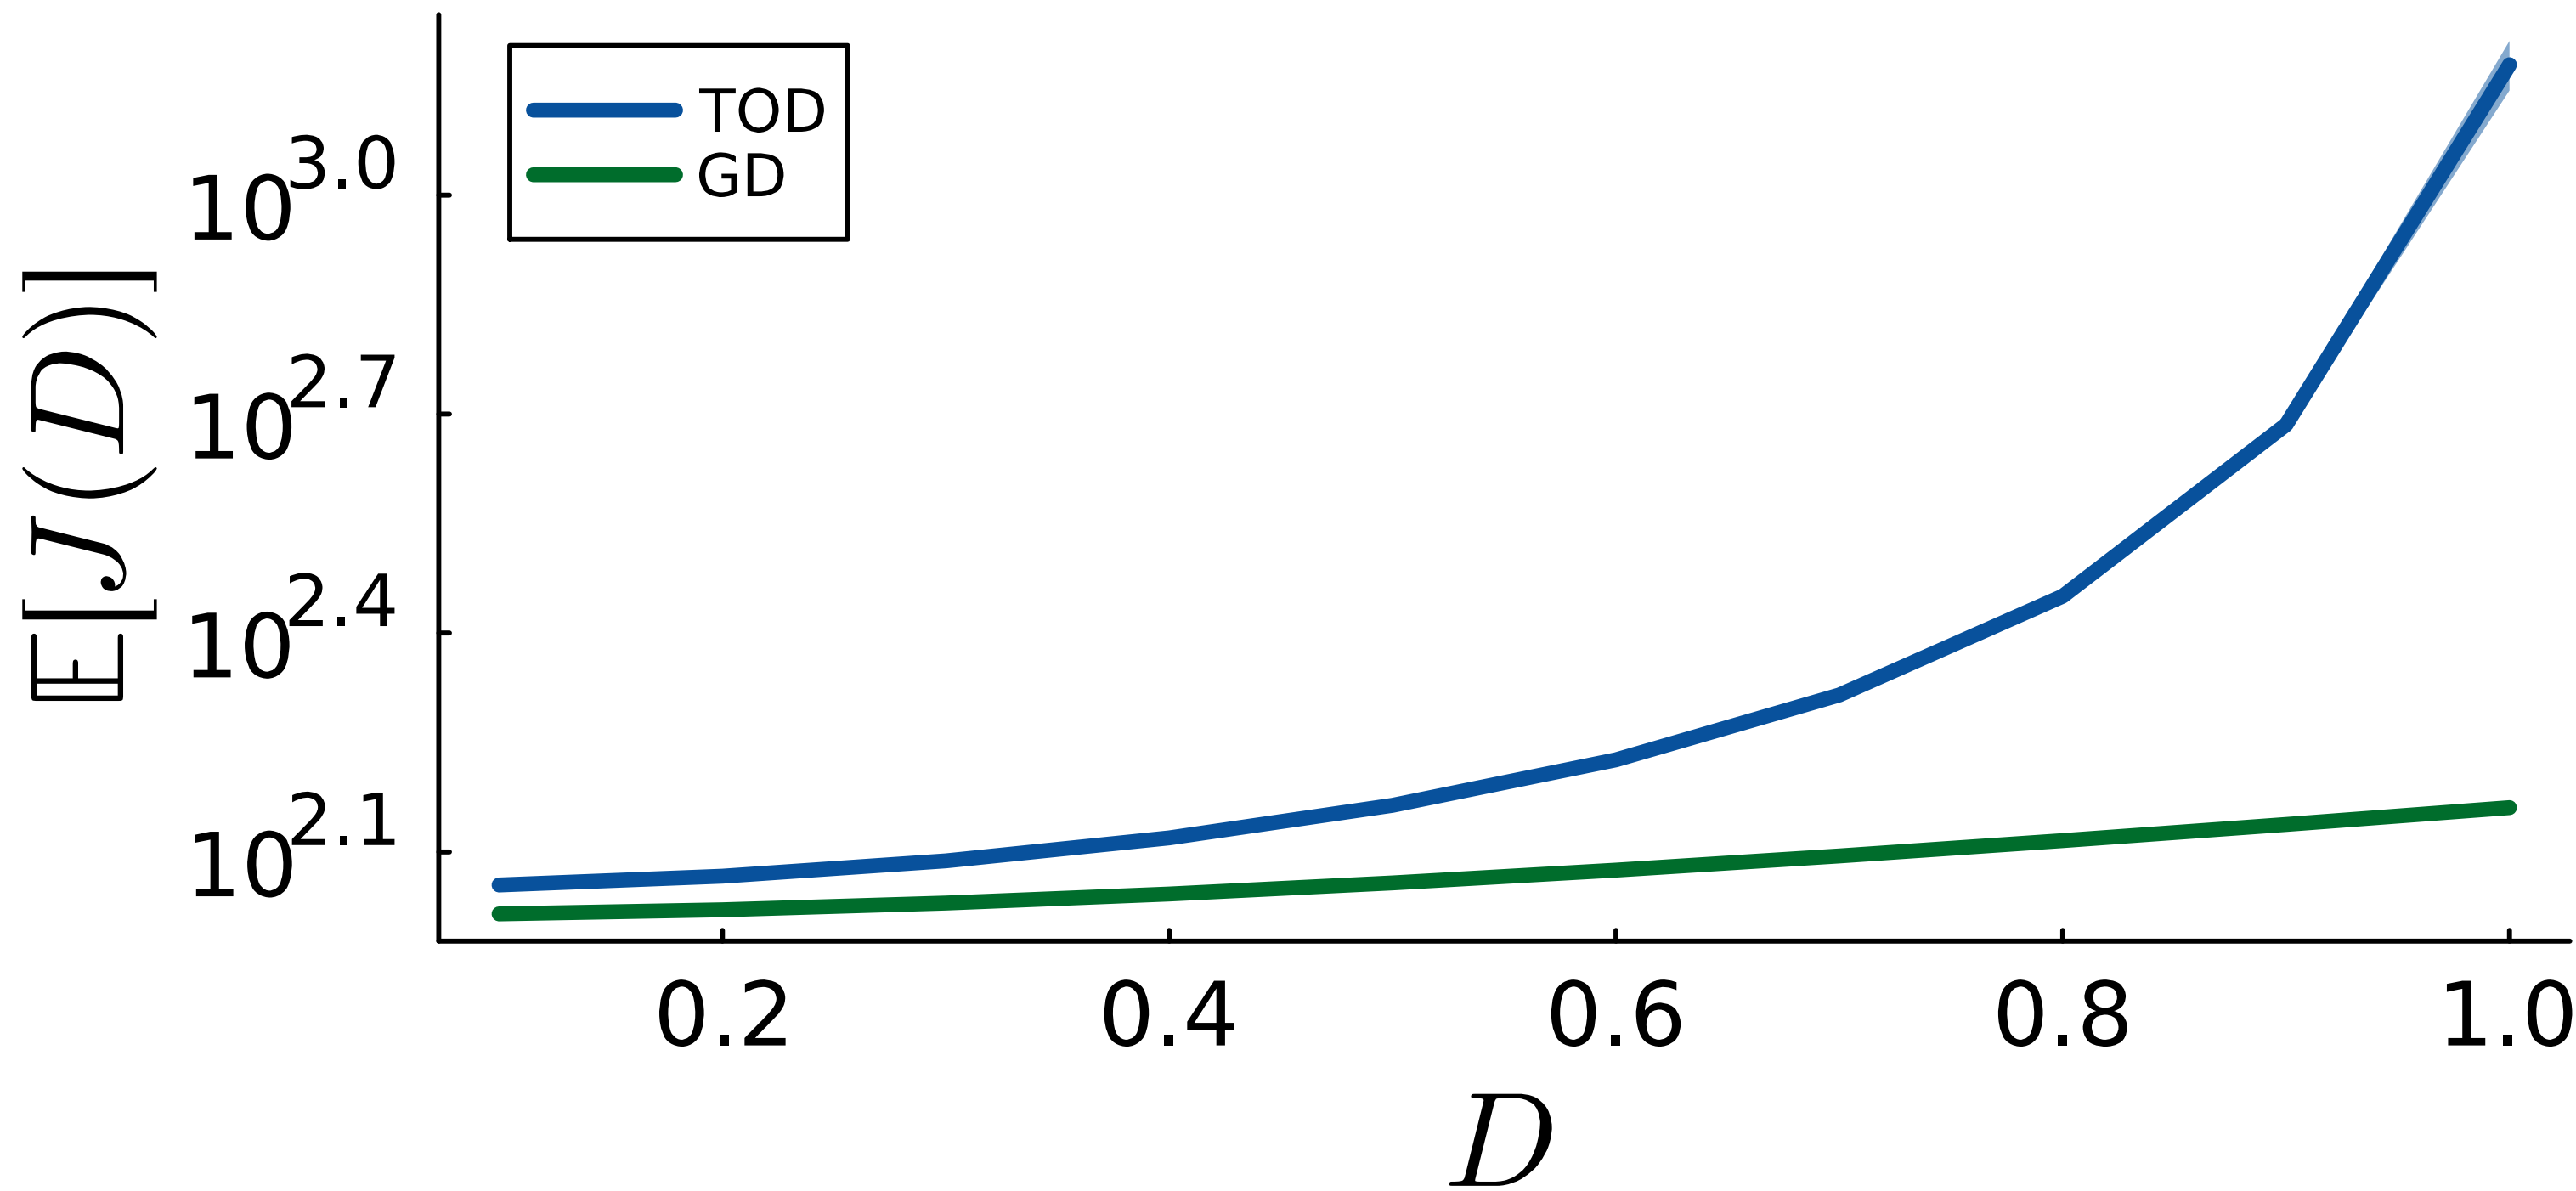

Supplement: supplementary_material [file attachment]

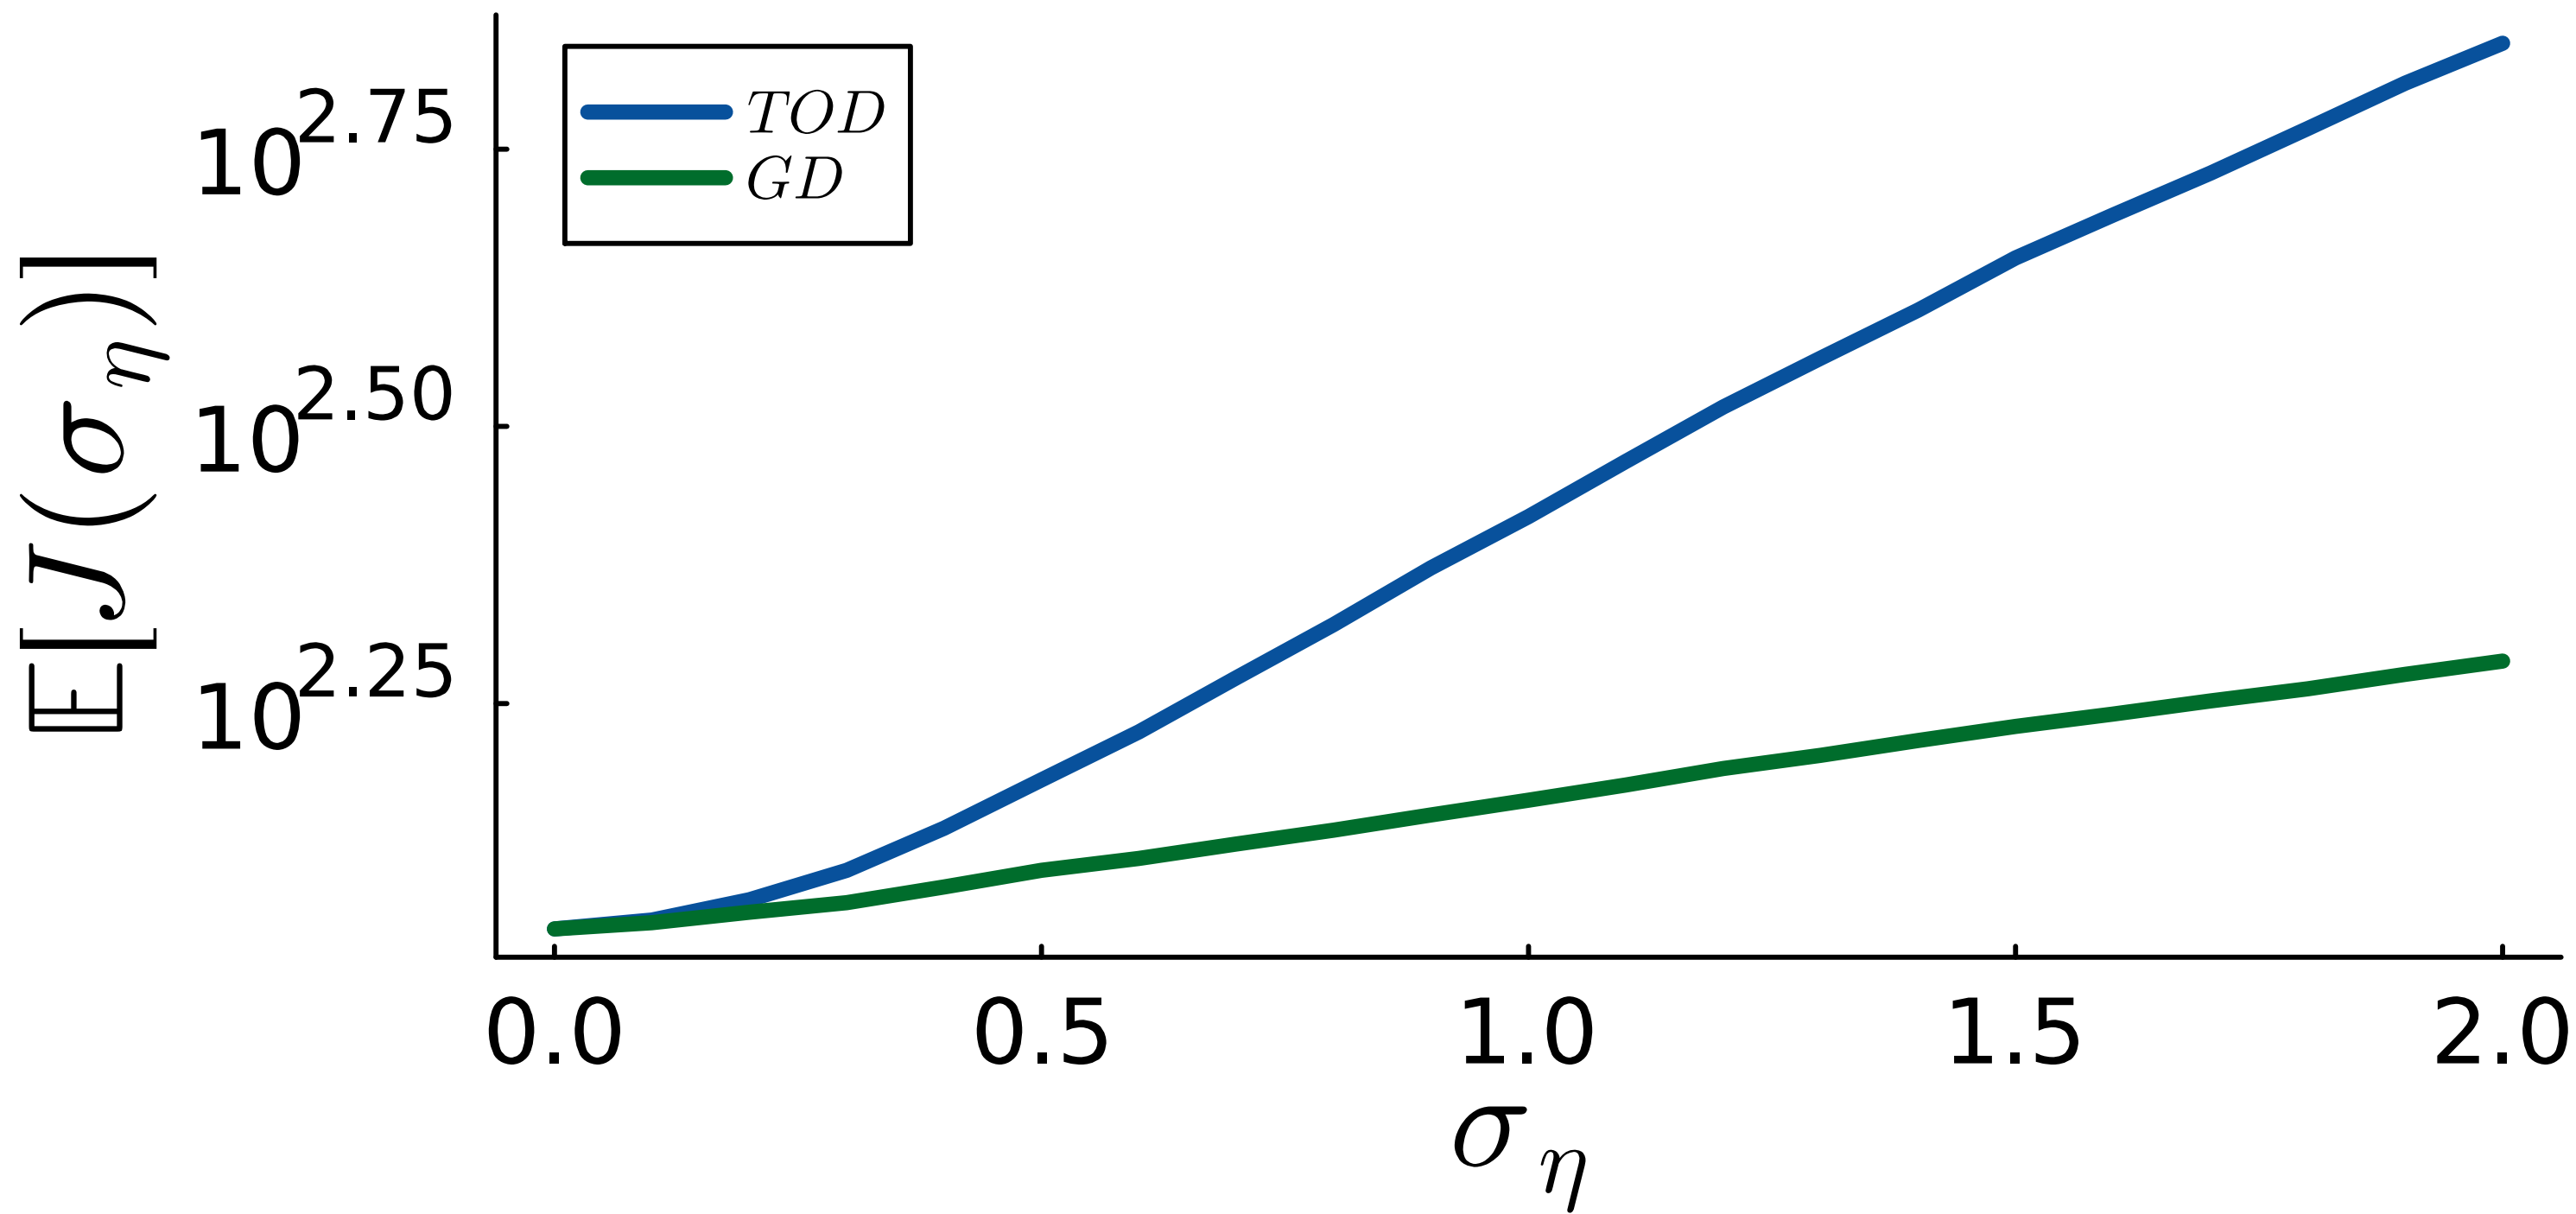

Supplement: supplementary_material [file attachment]

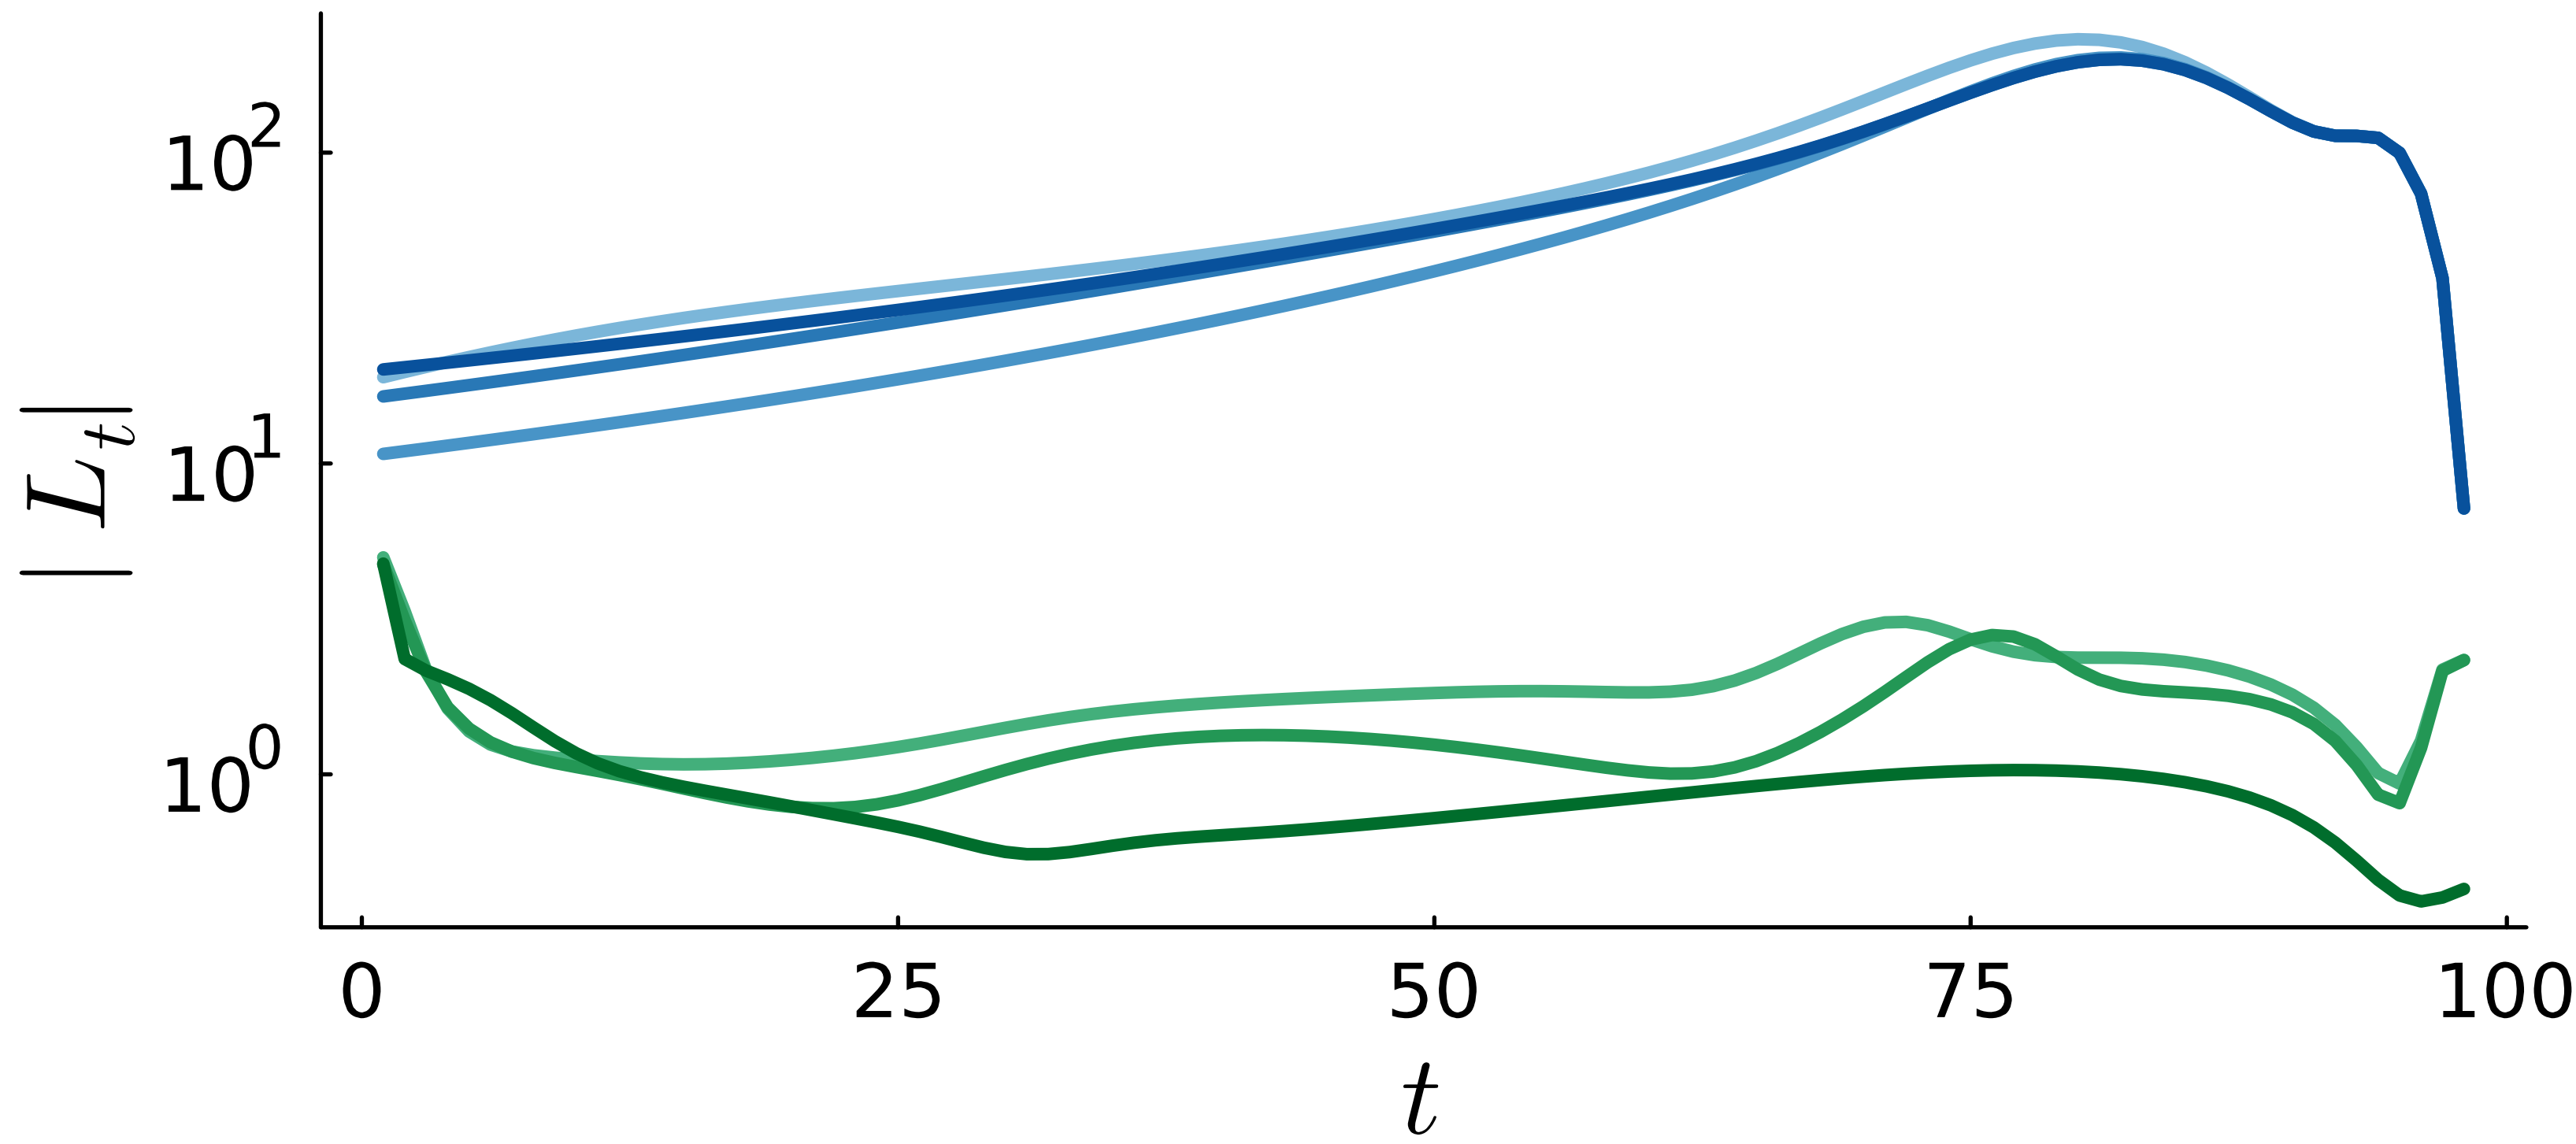

Supplement: supplementary_material [file attachment]

*TOD*

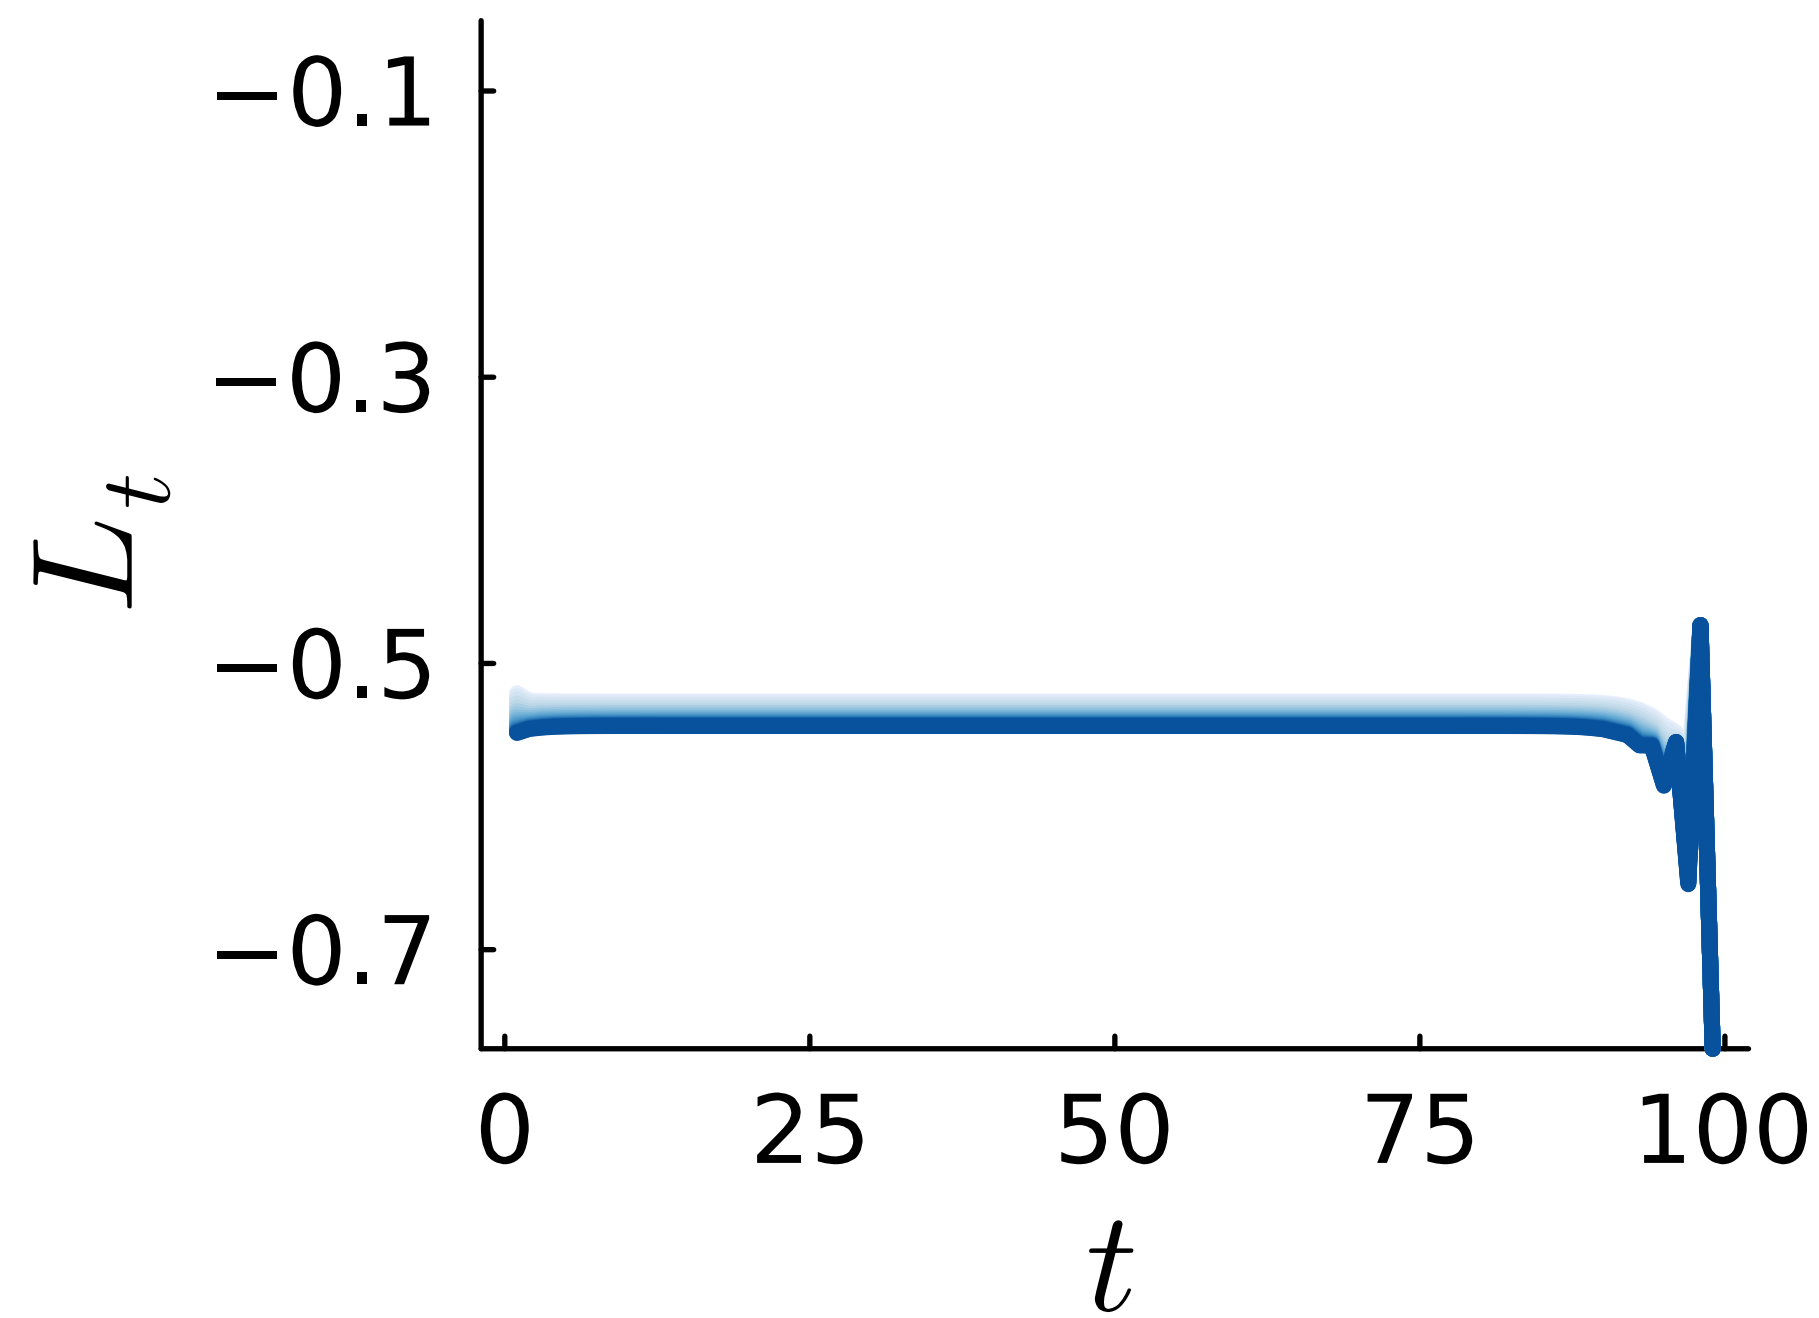

*GD*

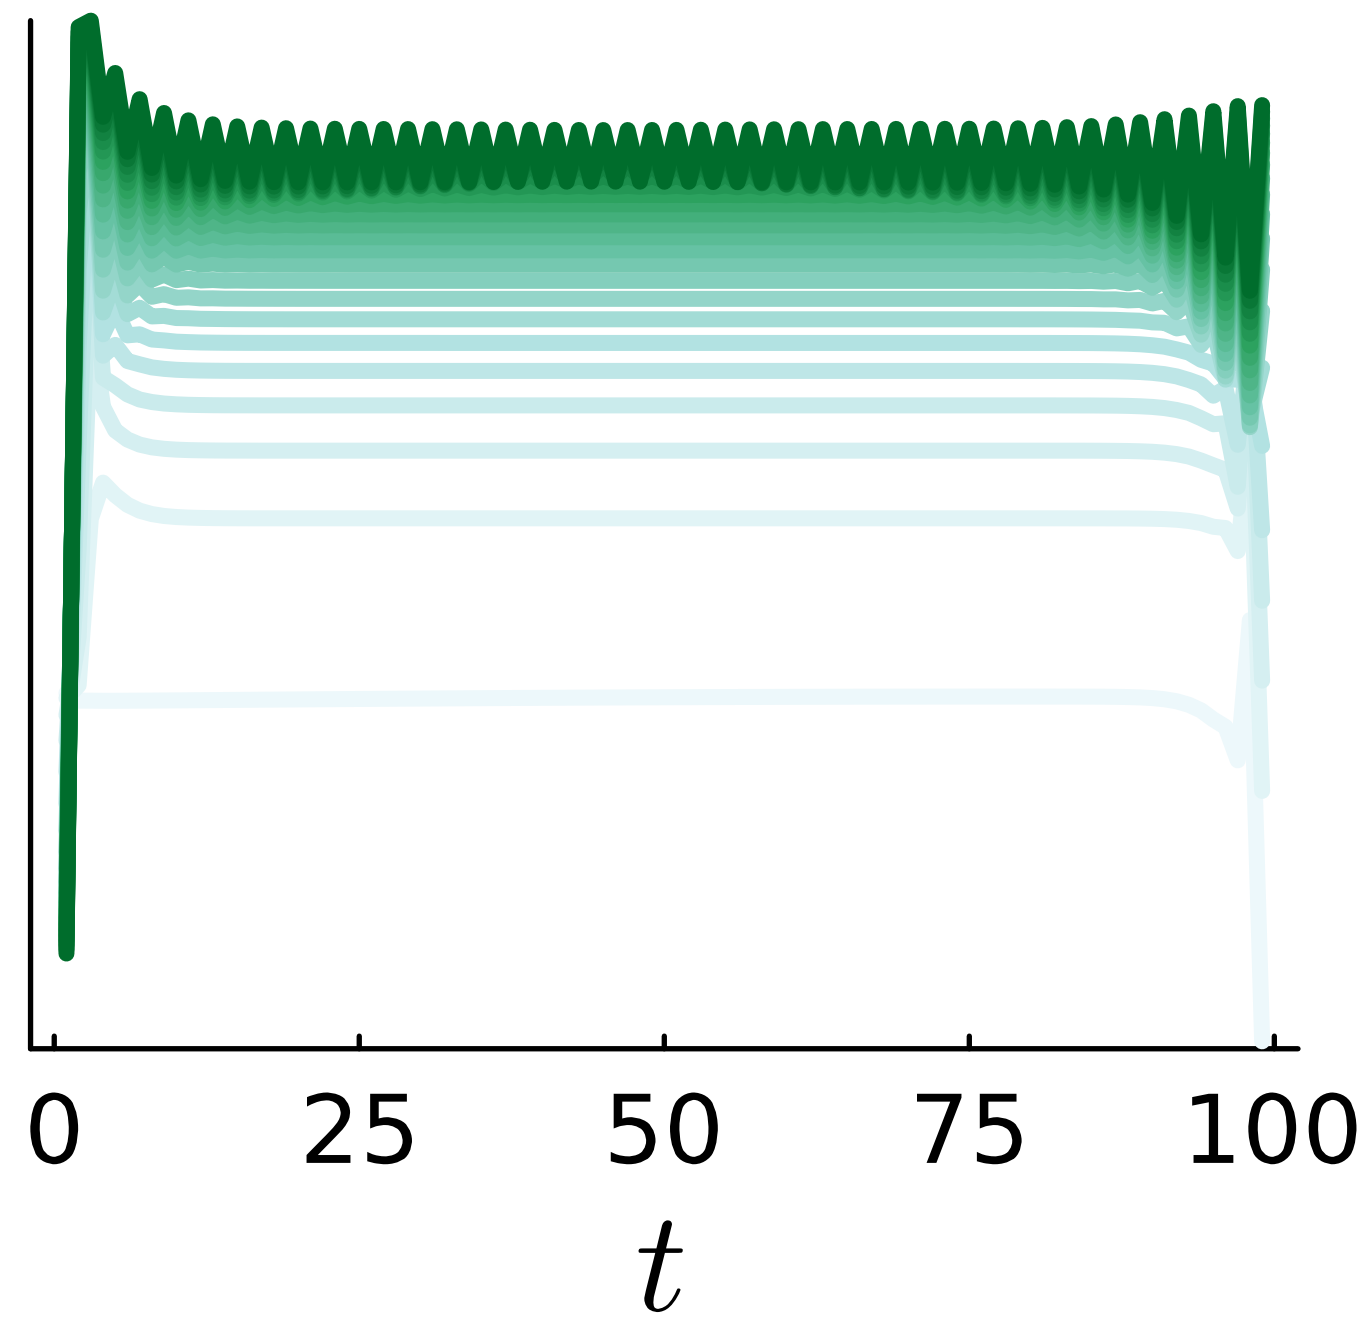

Supplement: supplementary_material [file attachment]

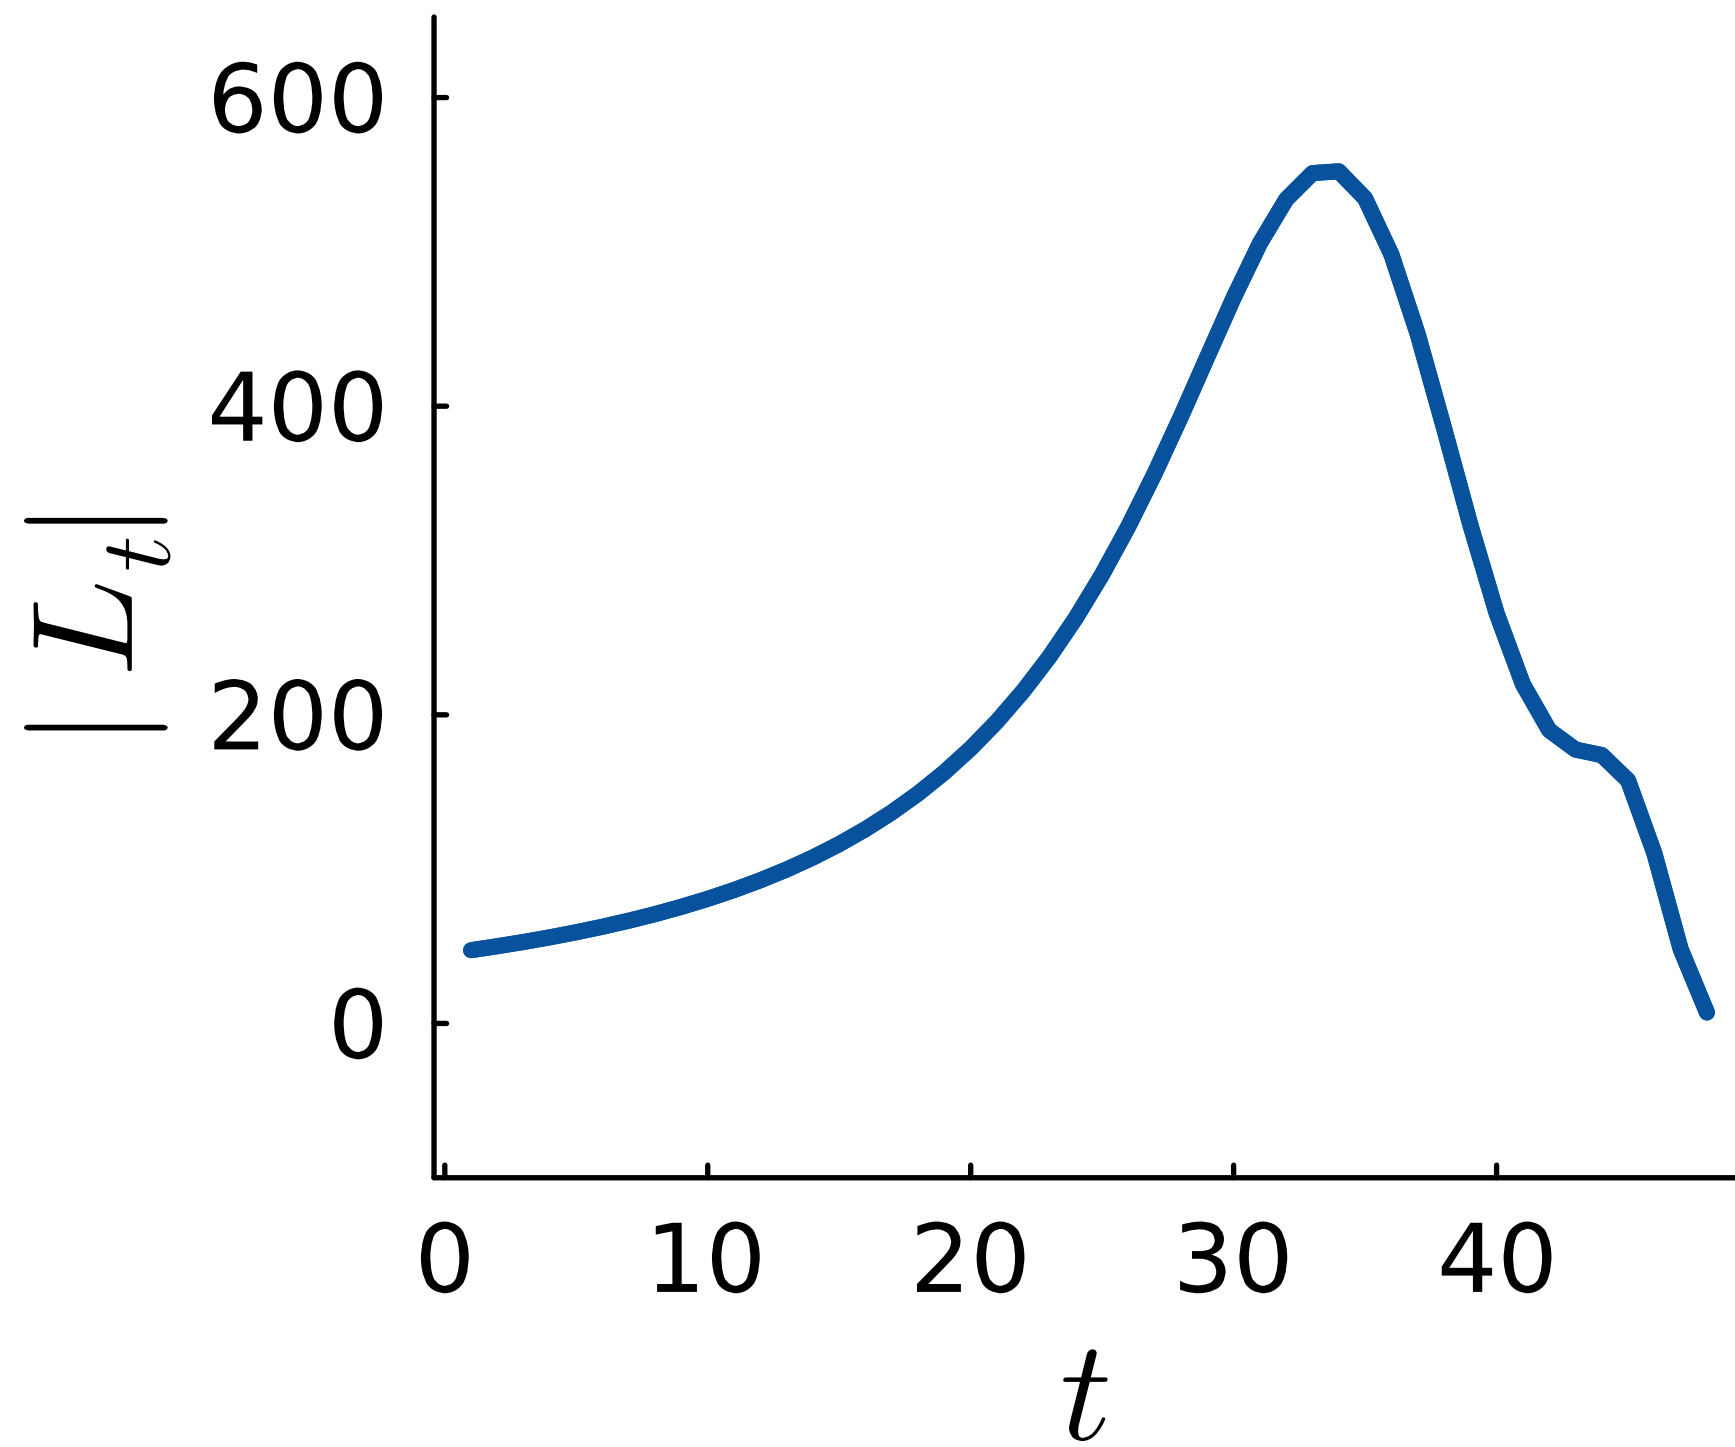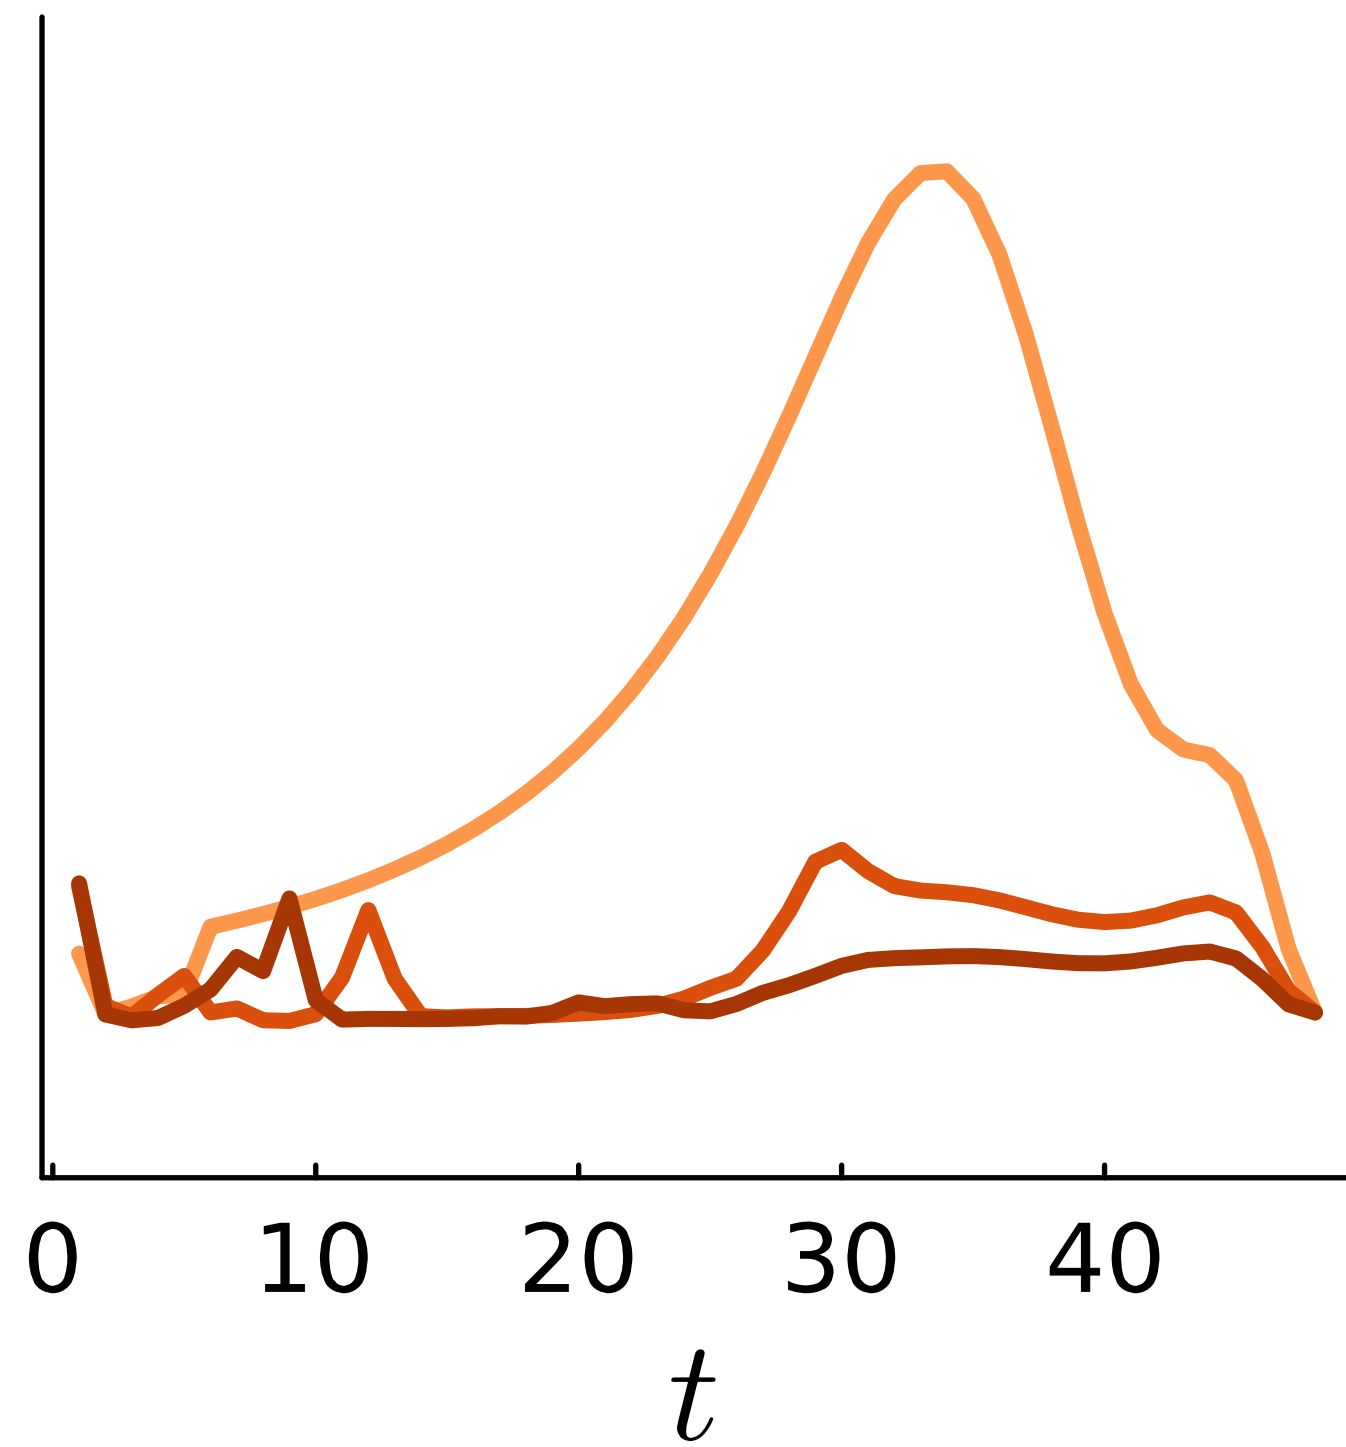

Supplement: supplementary_material [file attachment]

Iterative —  $GD$

$GD$

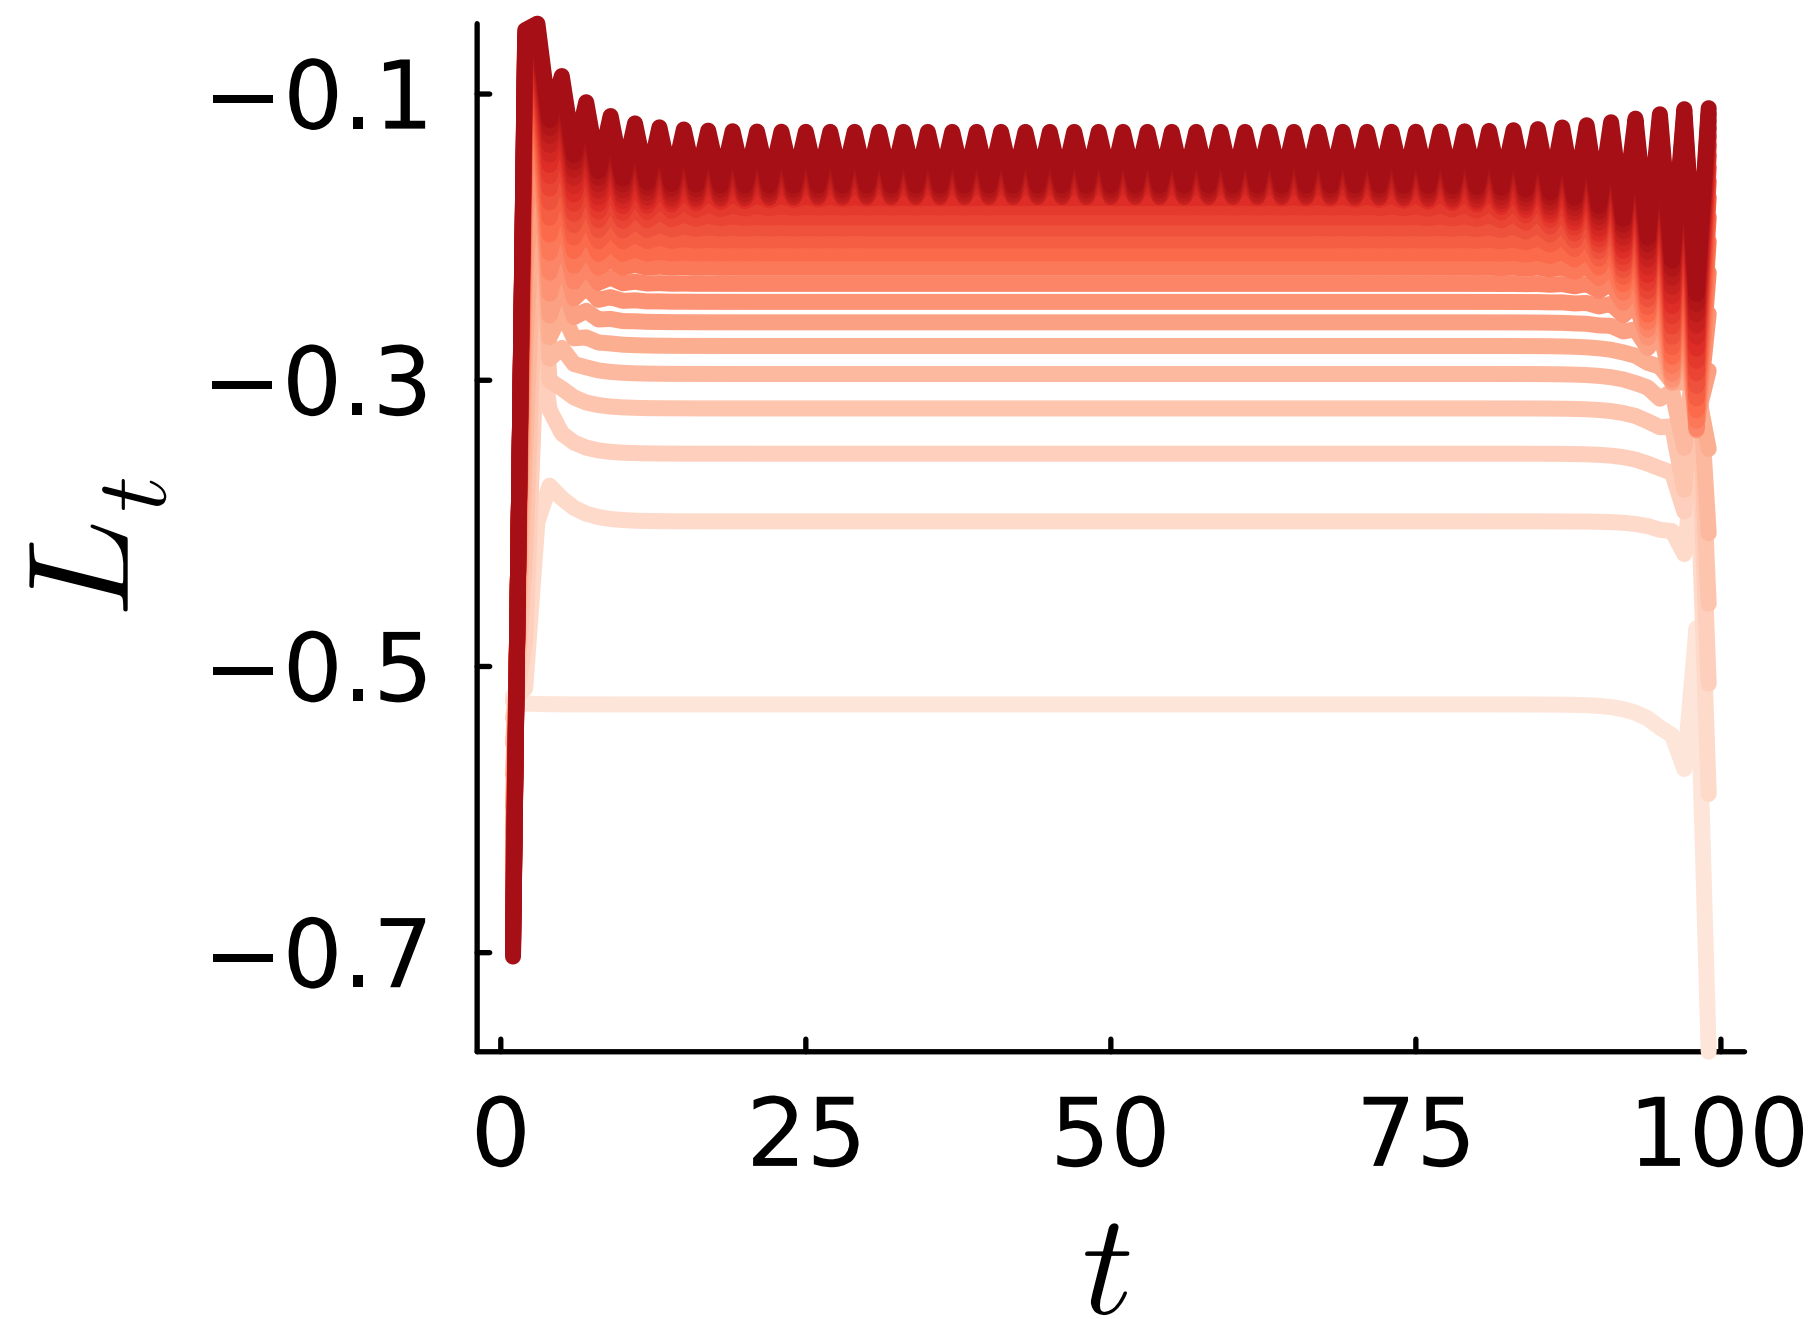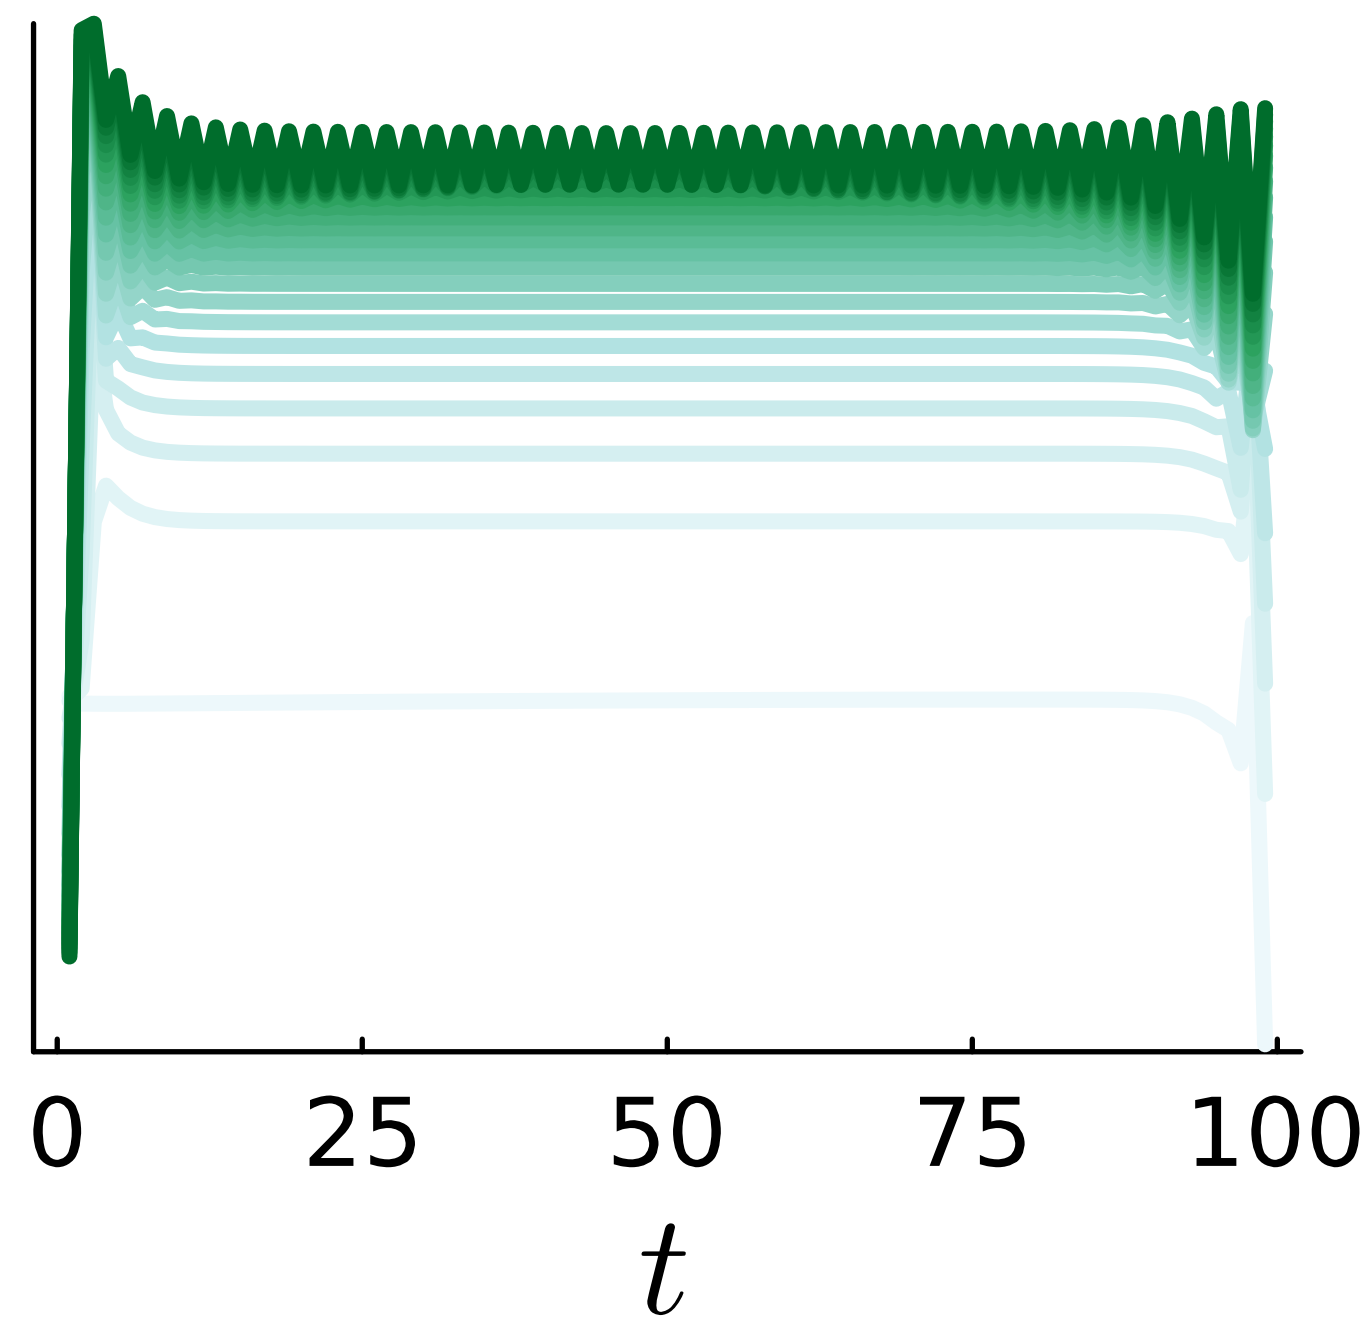

Supplement: supplementary_material [file attachment]

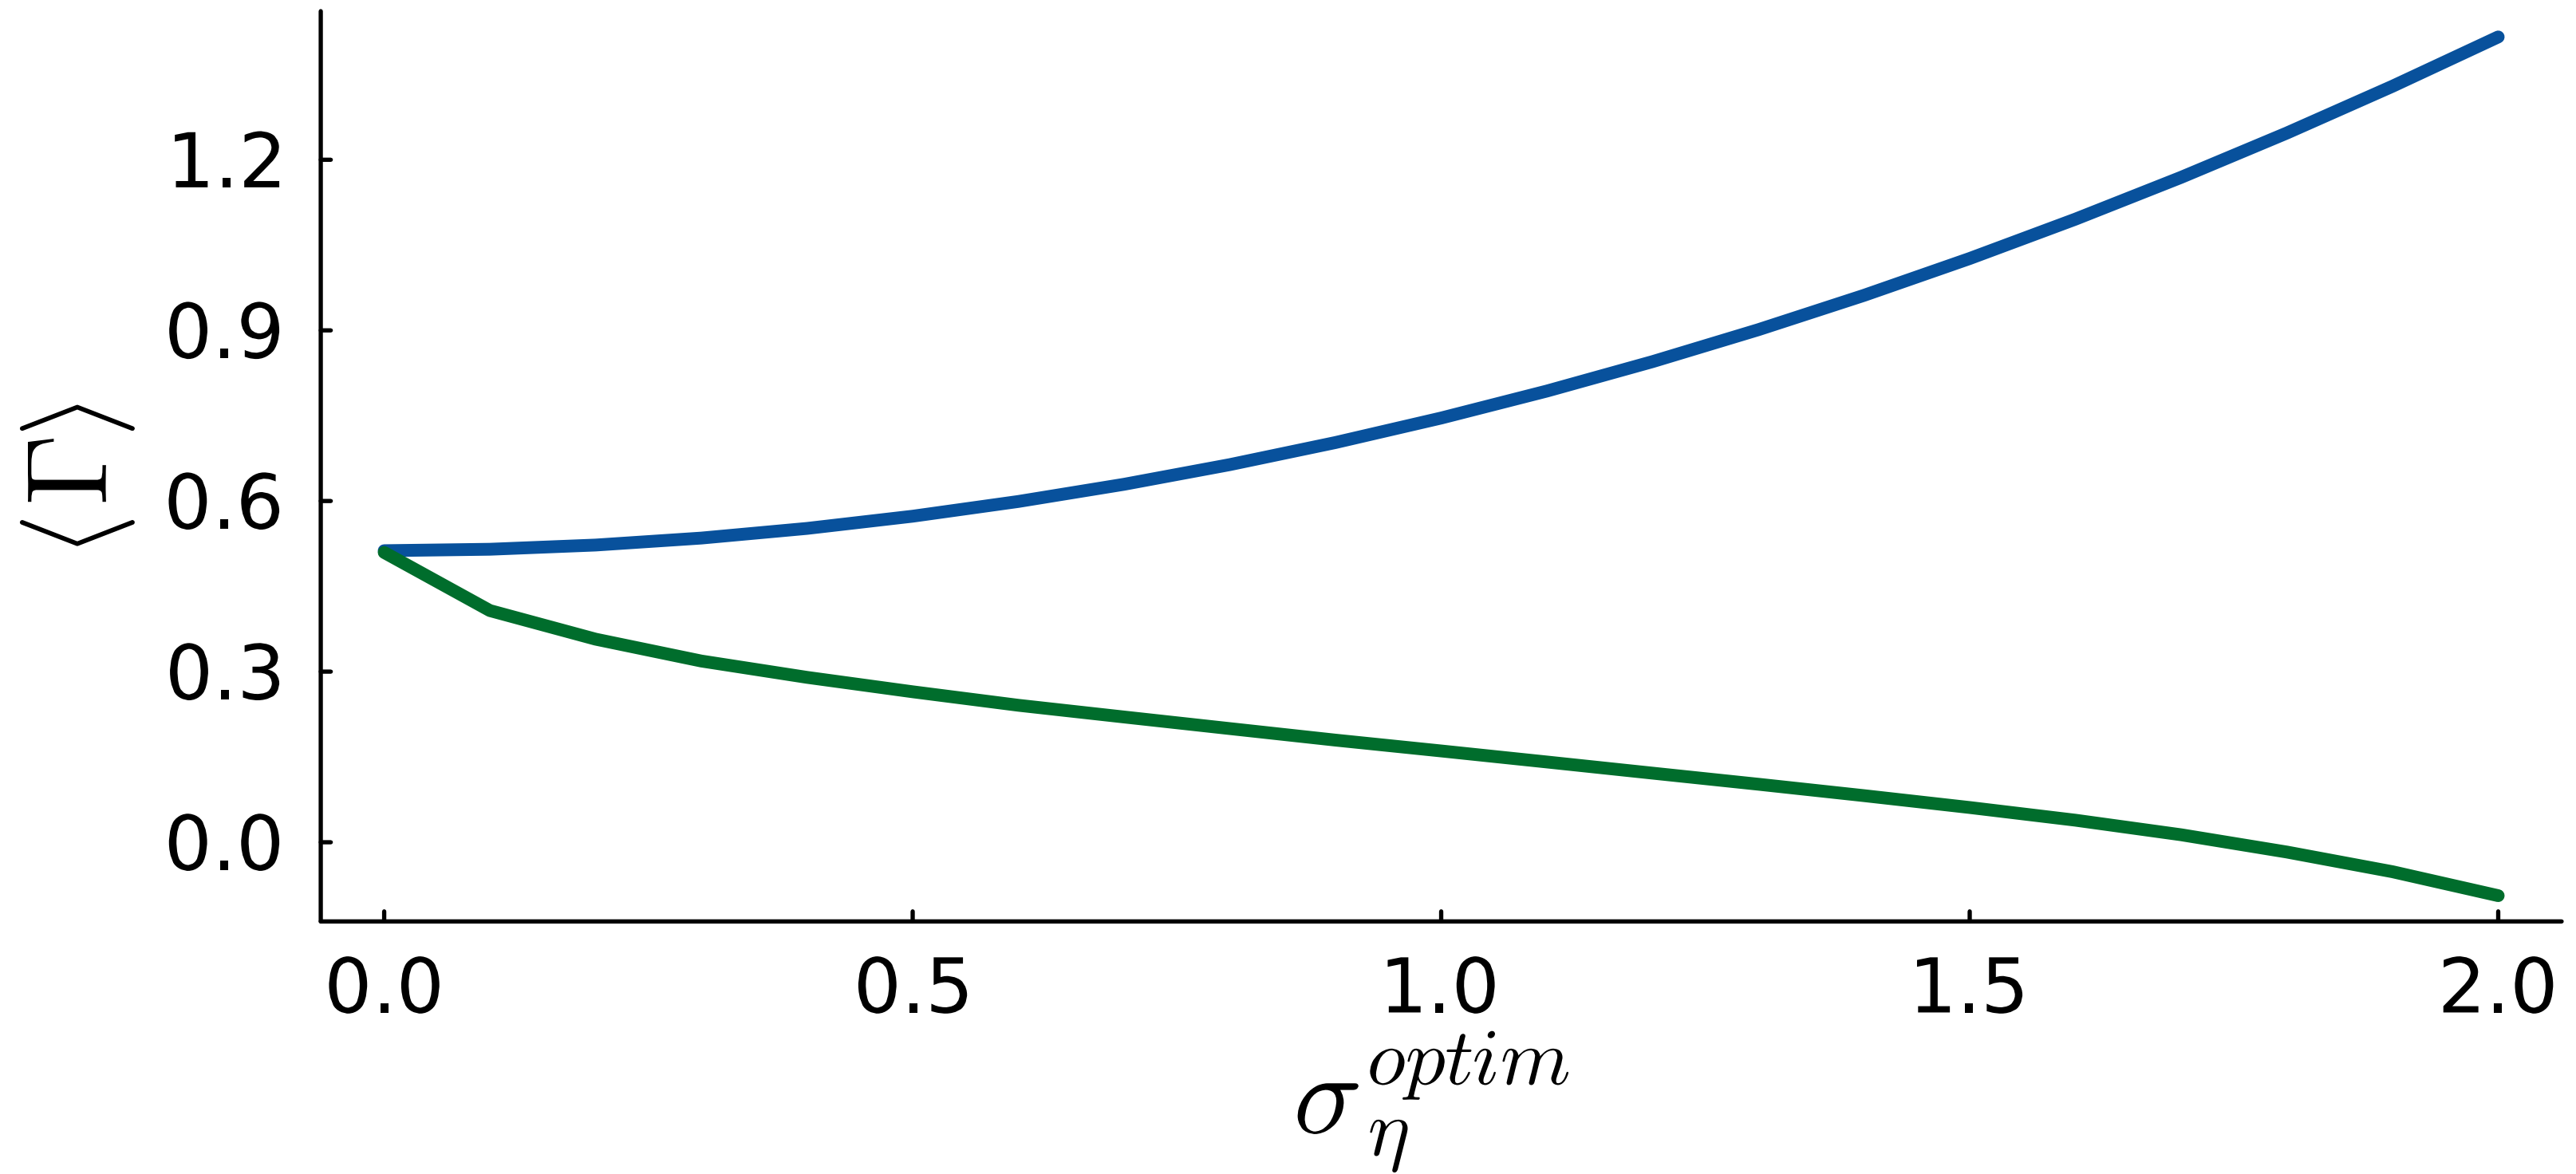

Supplement: supplementary_material [file attachment]

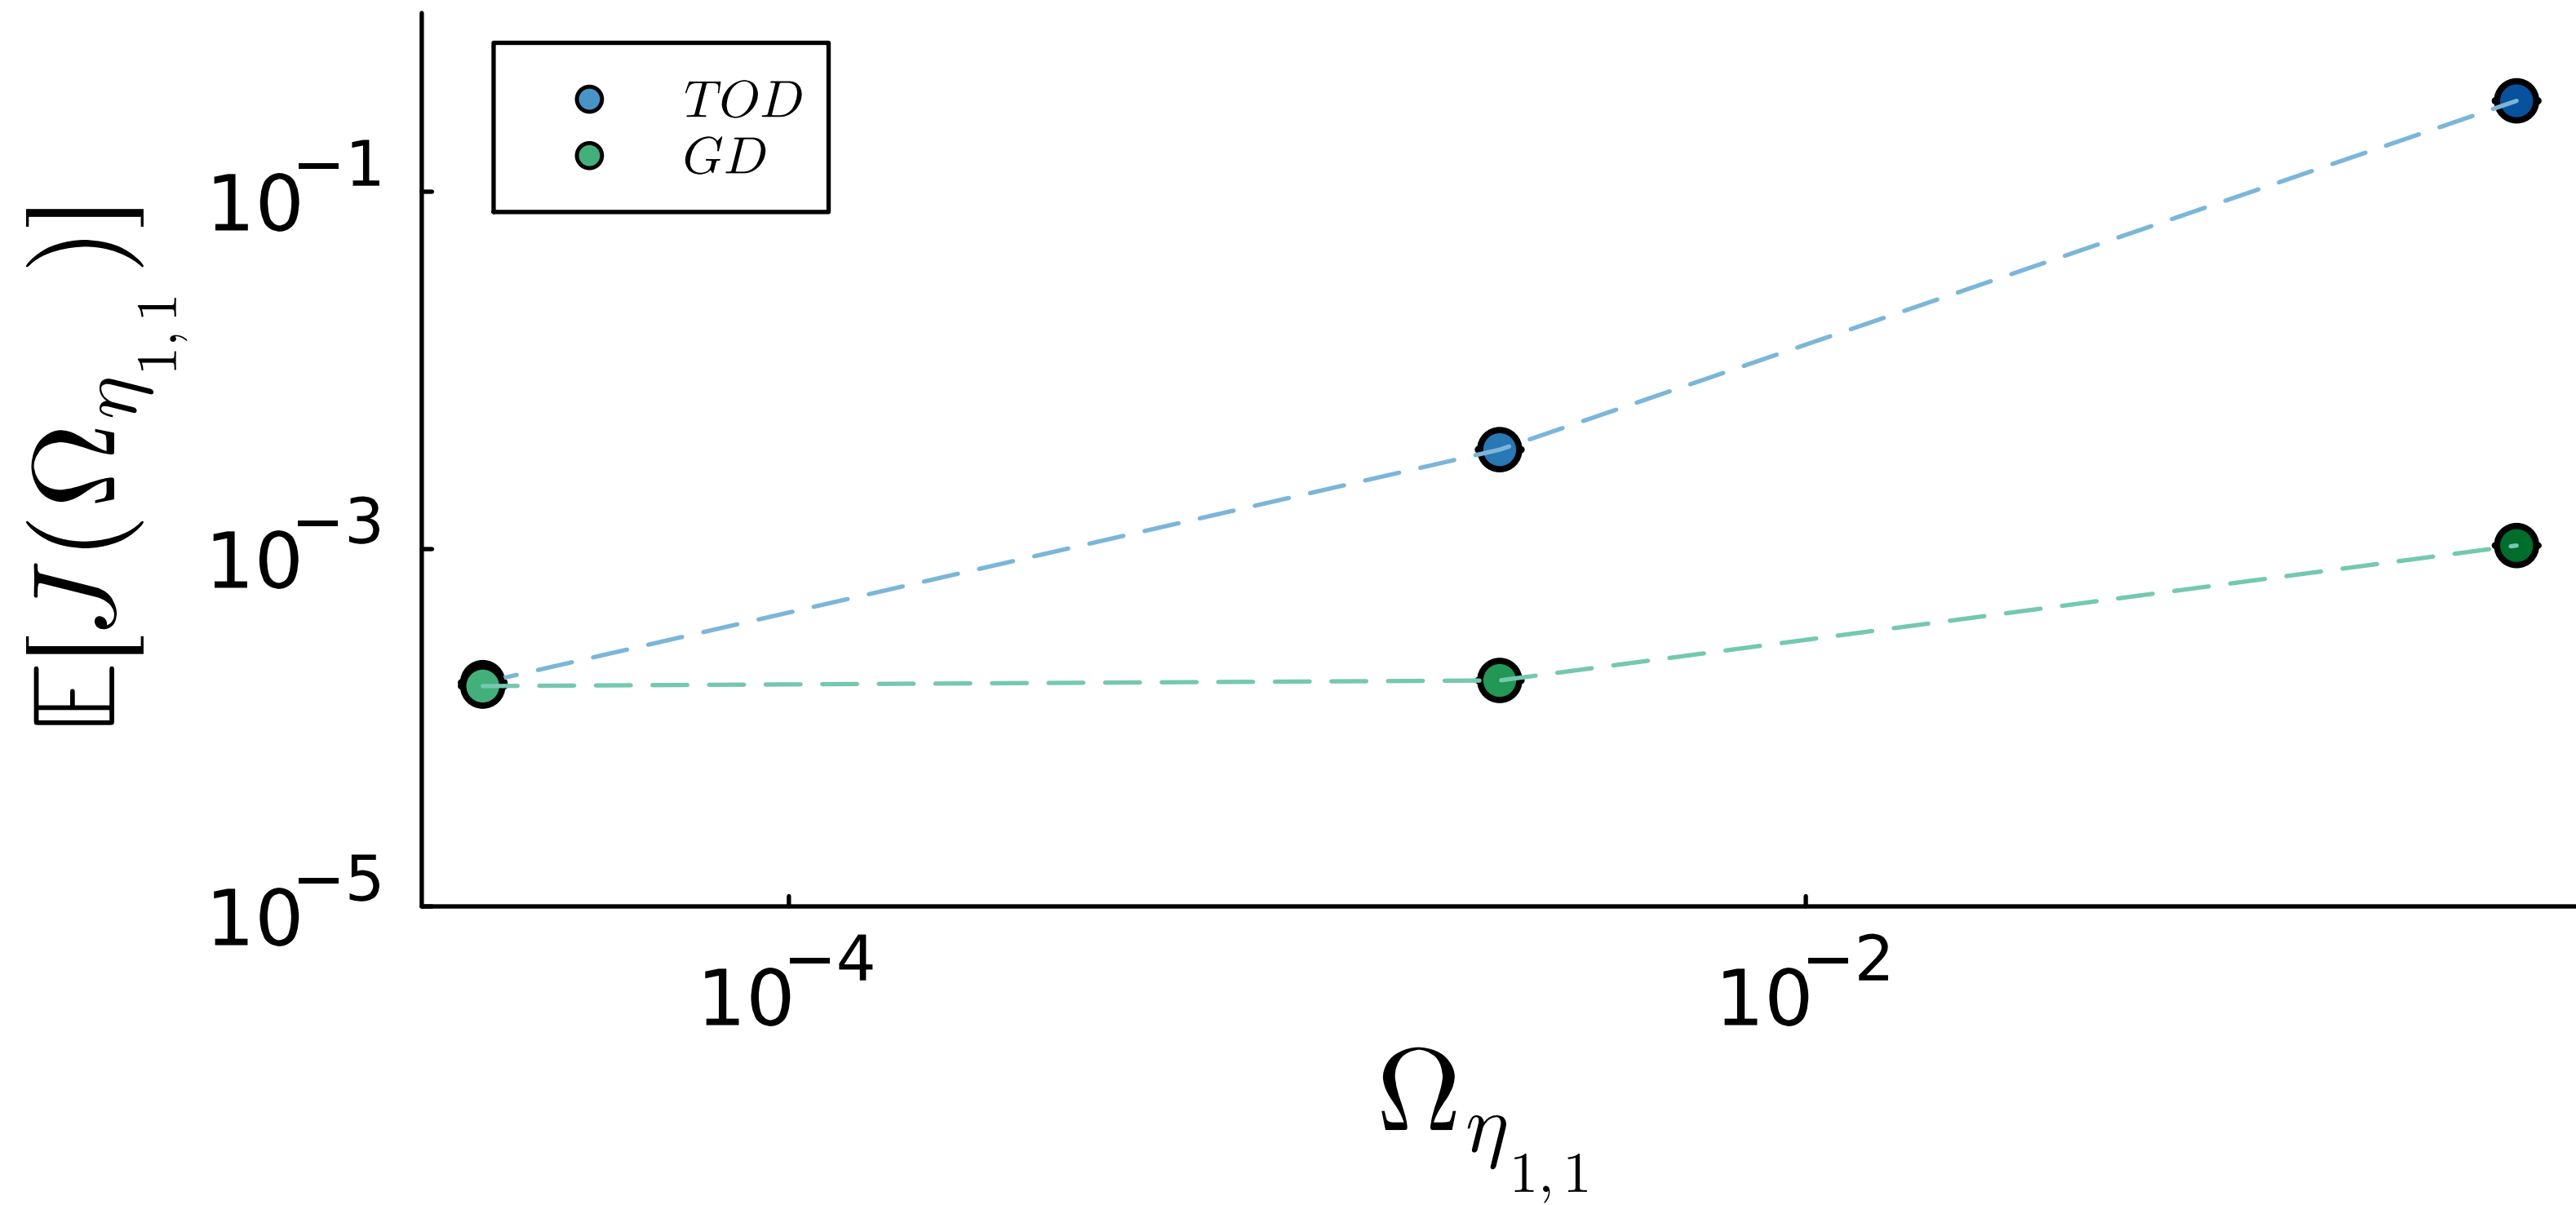

Supplement: supplementary_material [file attachment]

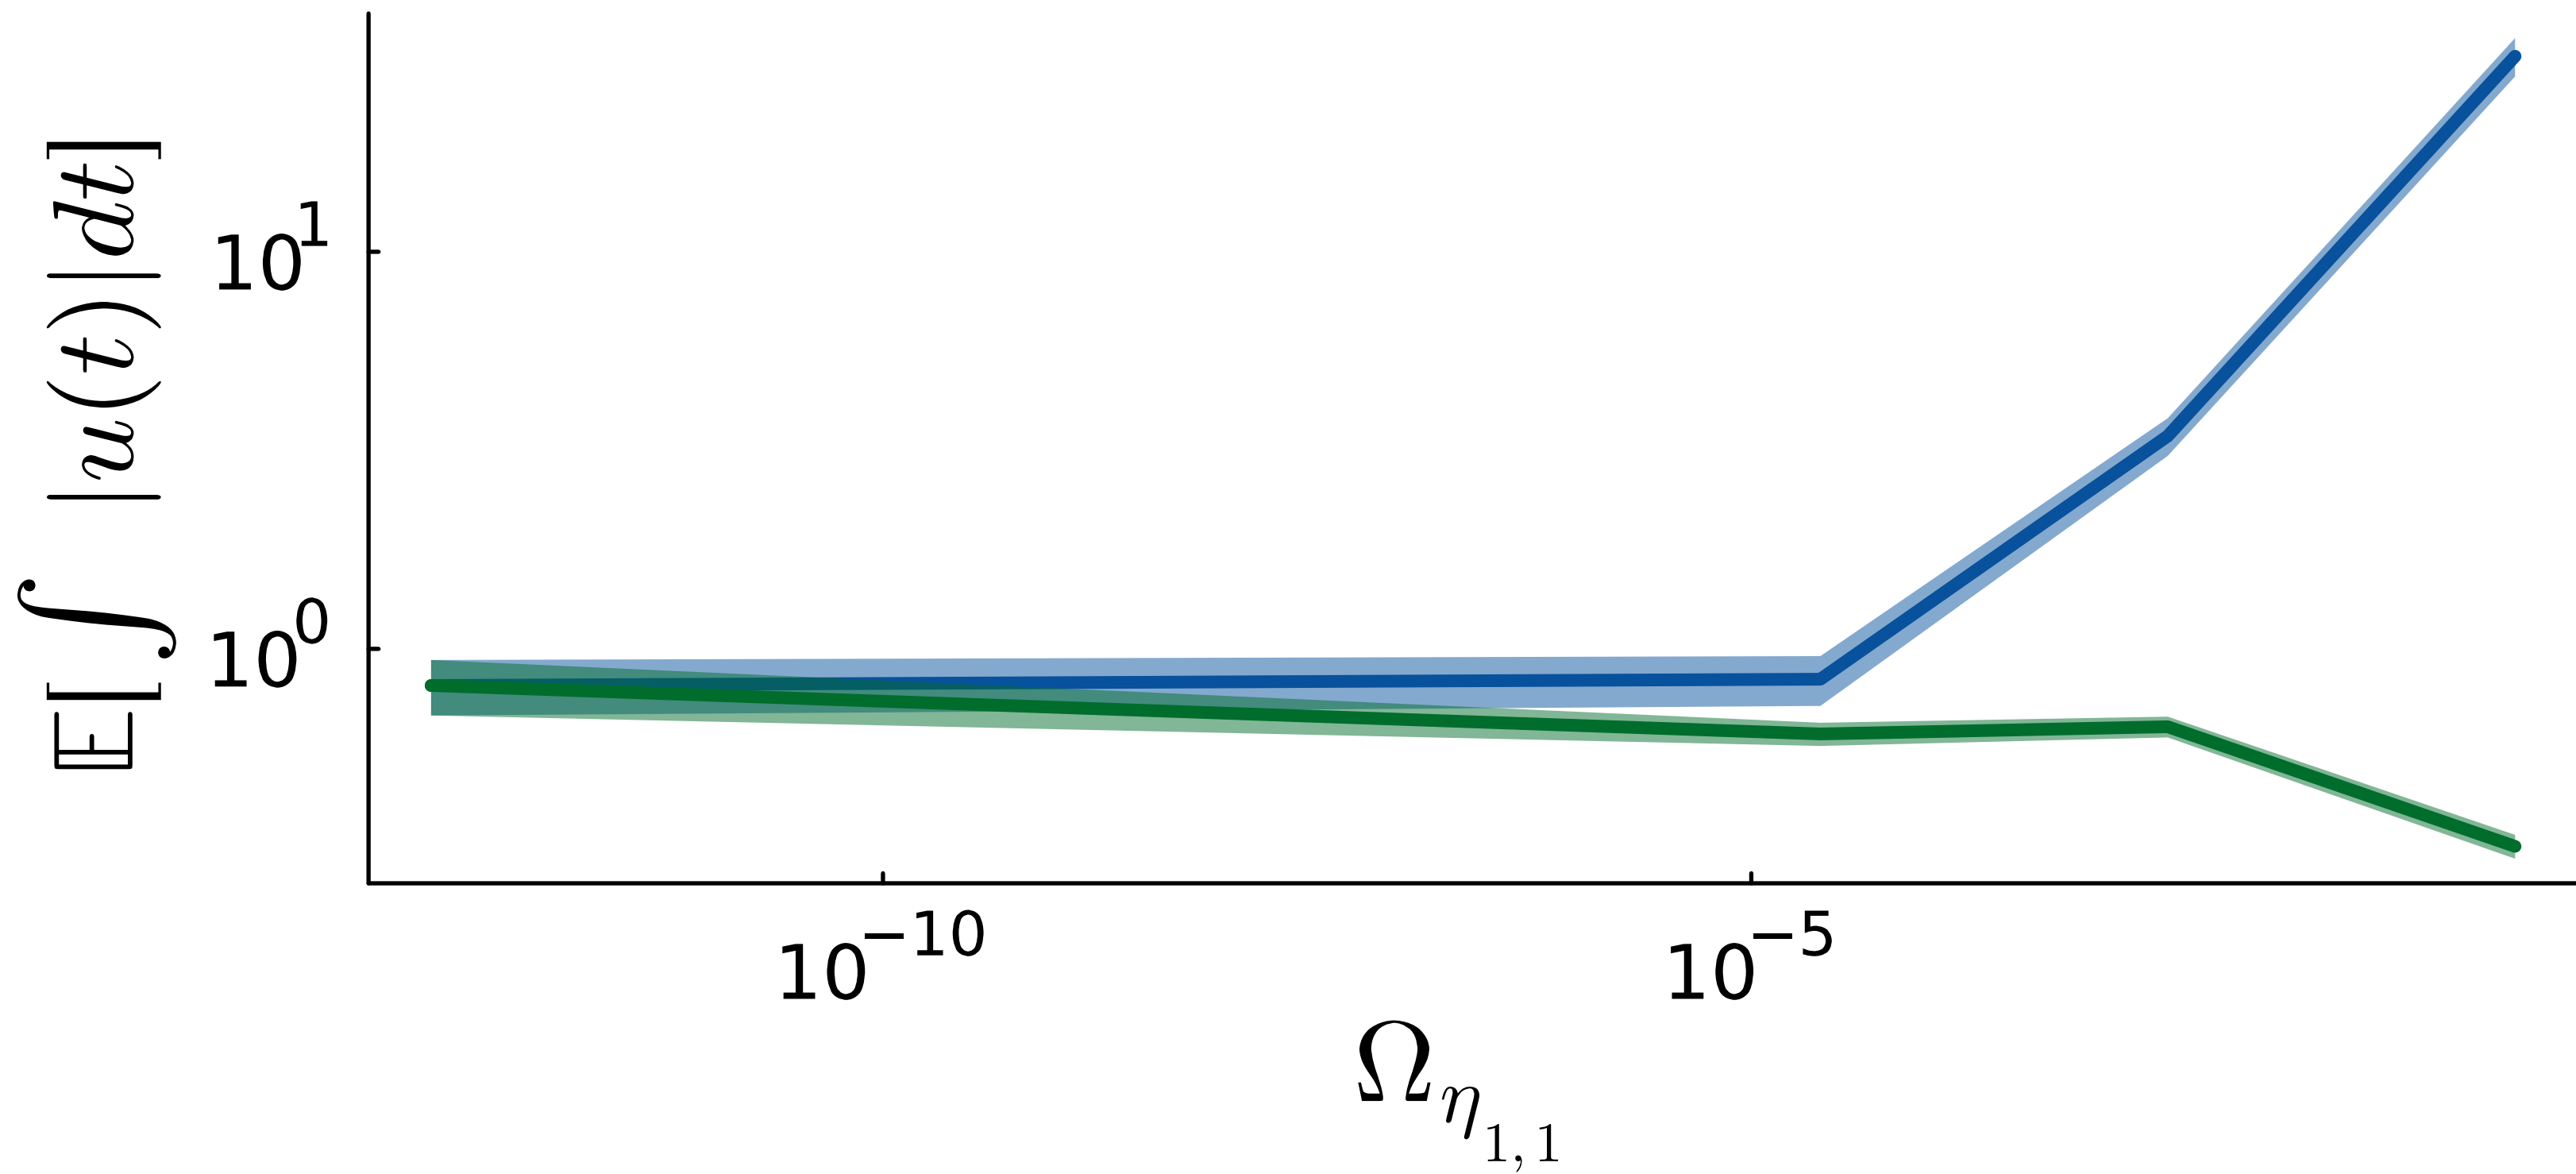

Supplement: supplementary_material [file attachment]

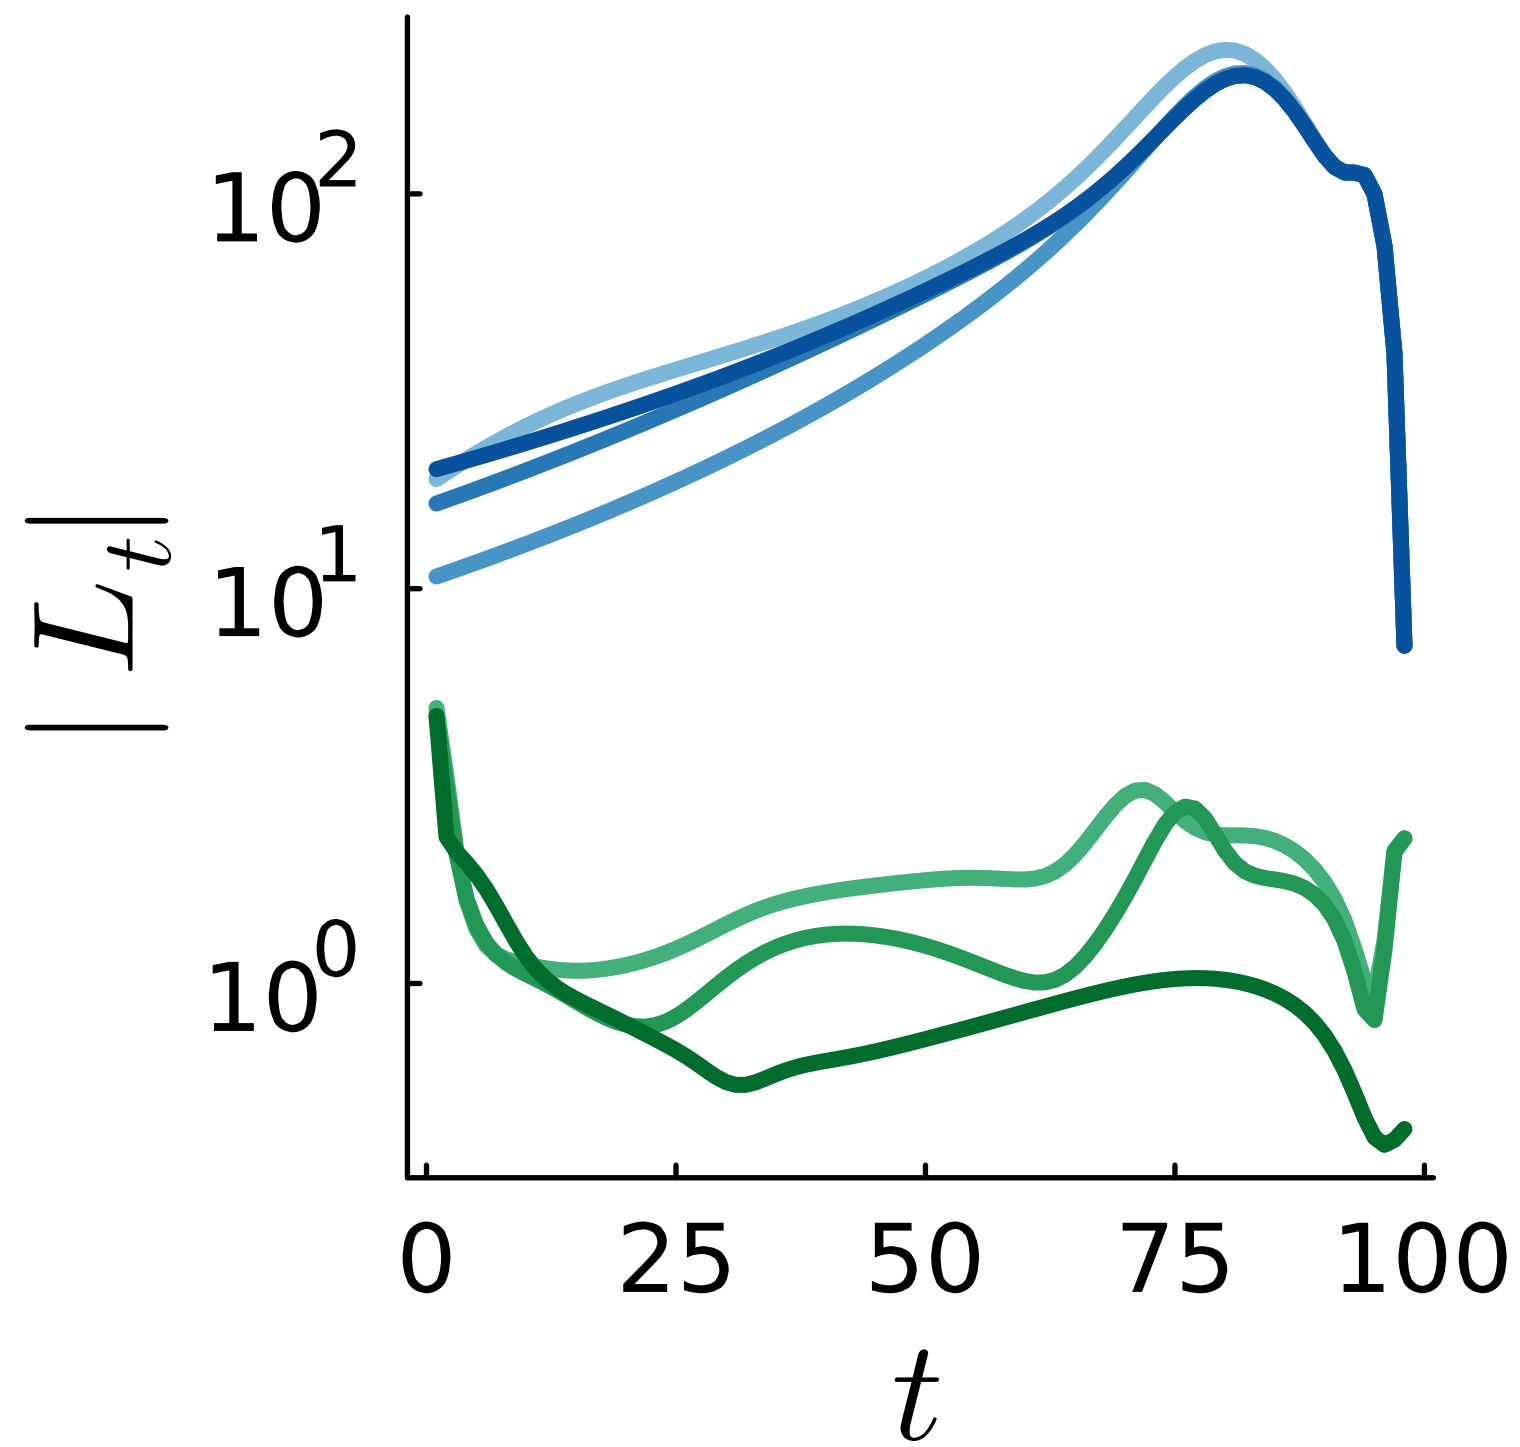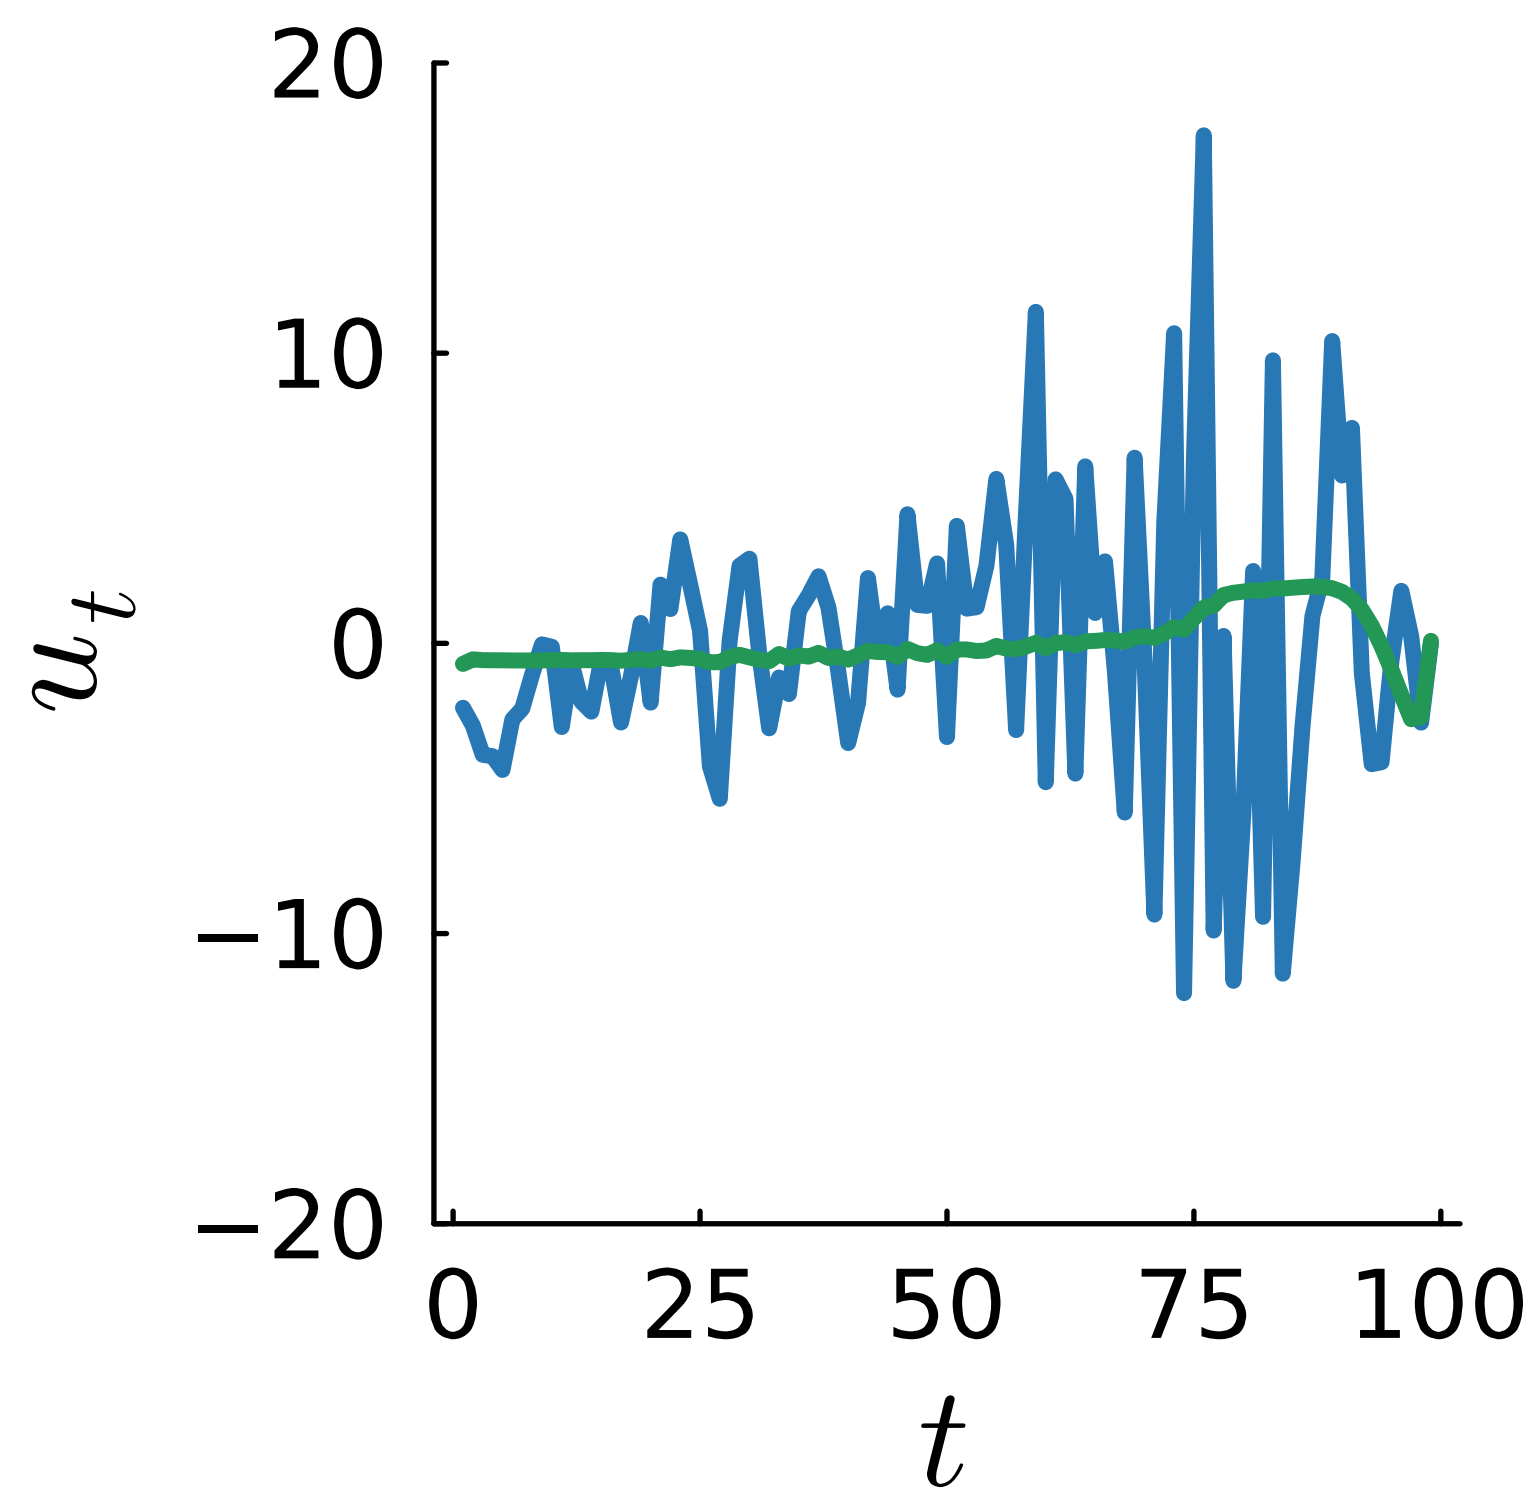

Supplement: supplementary_material [file attachment]

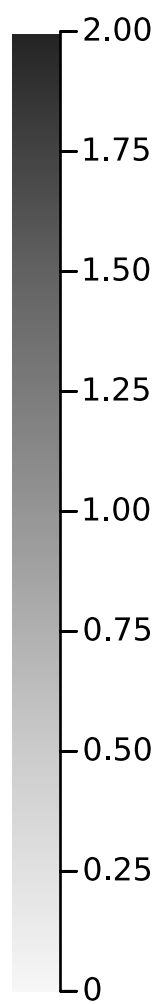

Supplement: supplementary_material [file attachment]

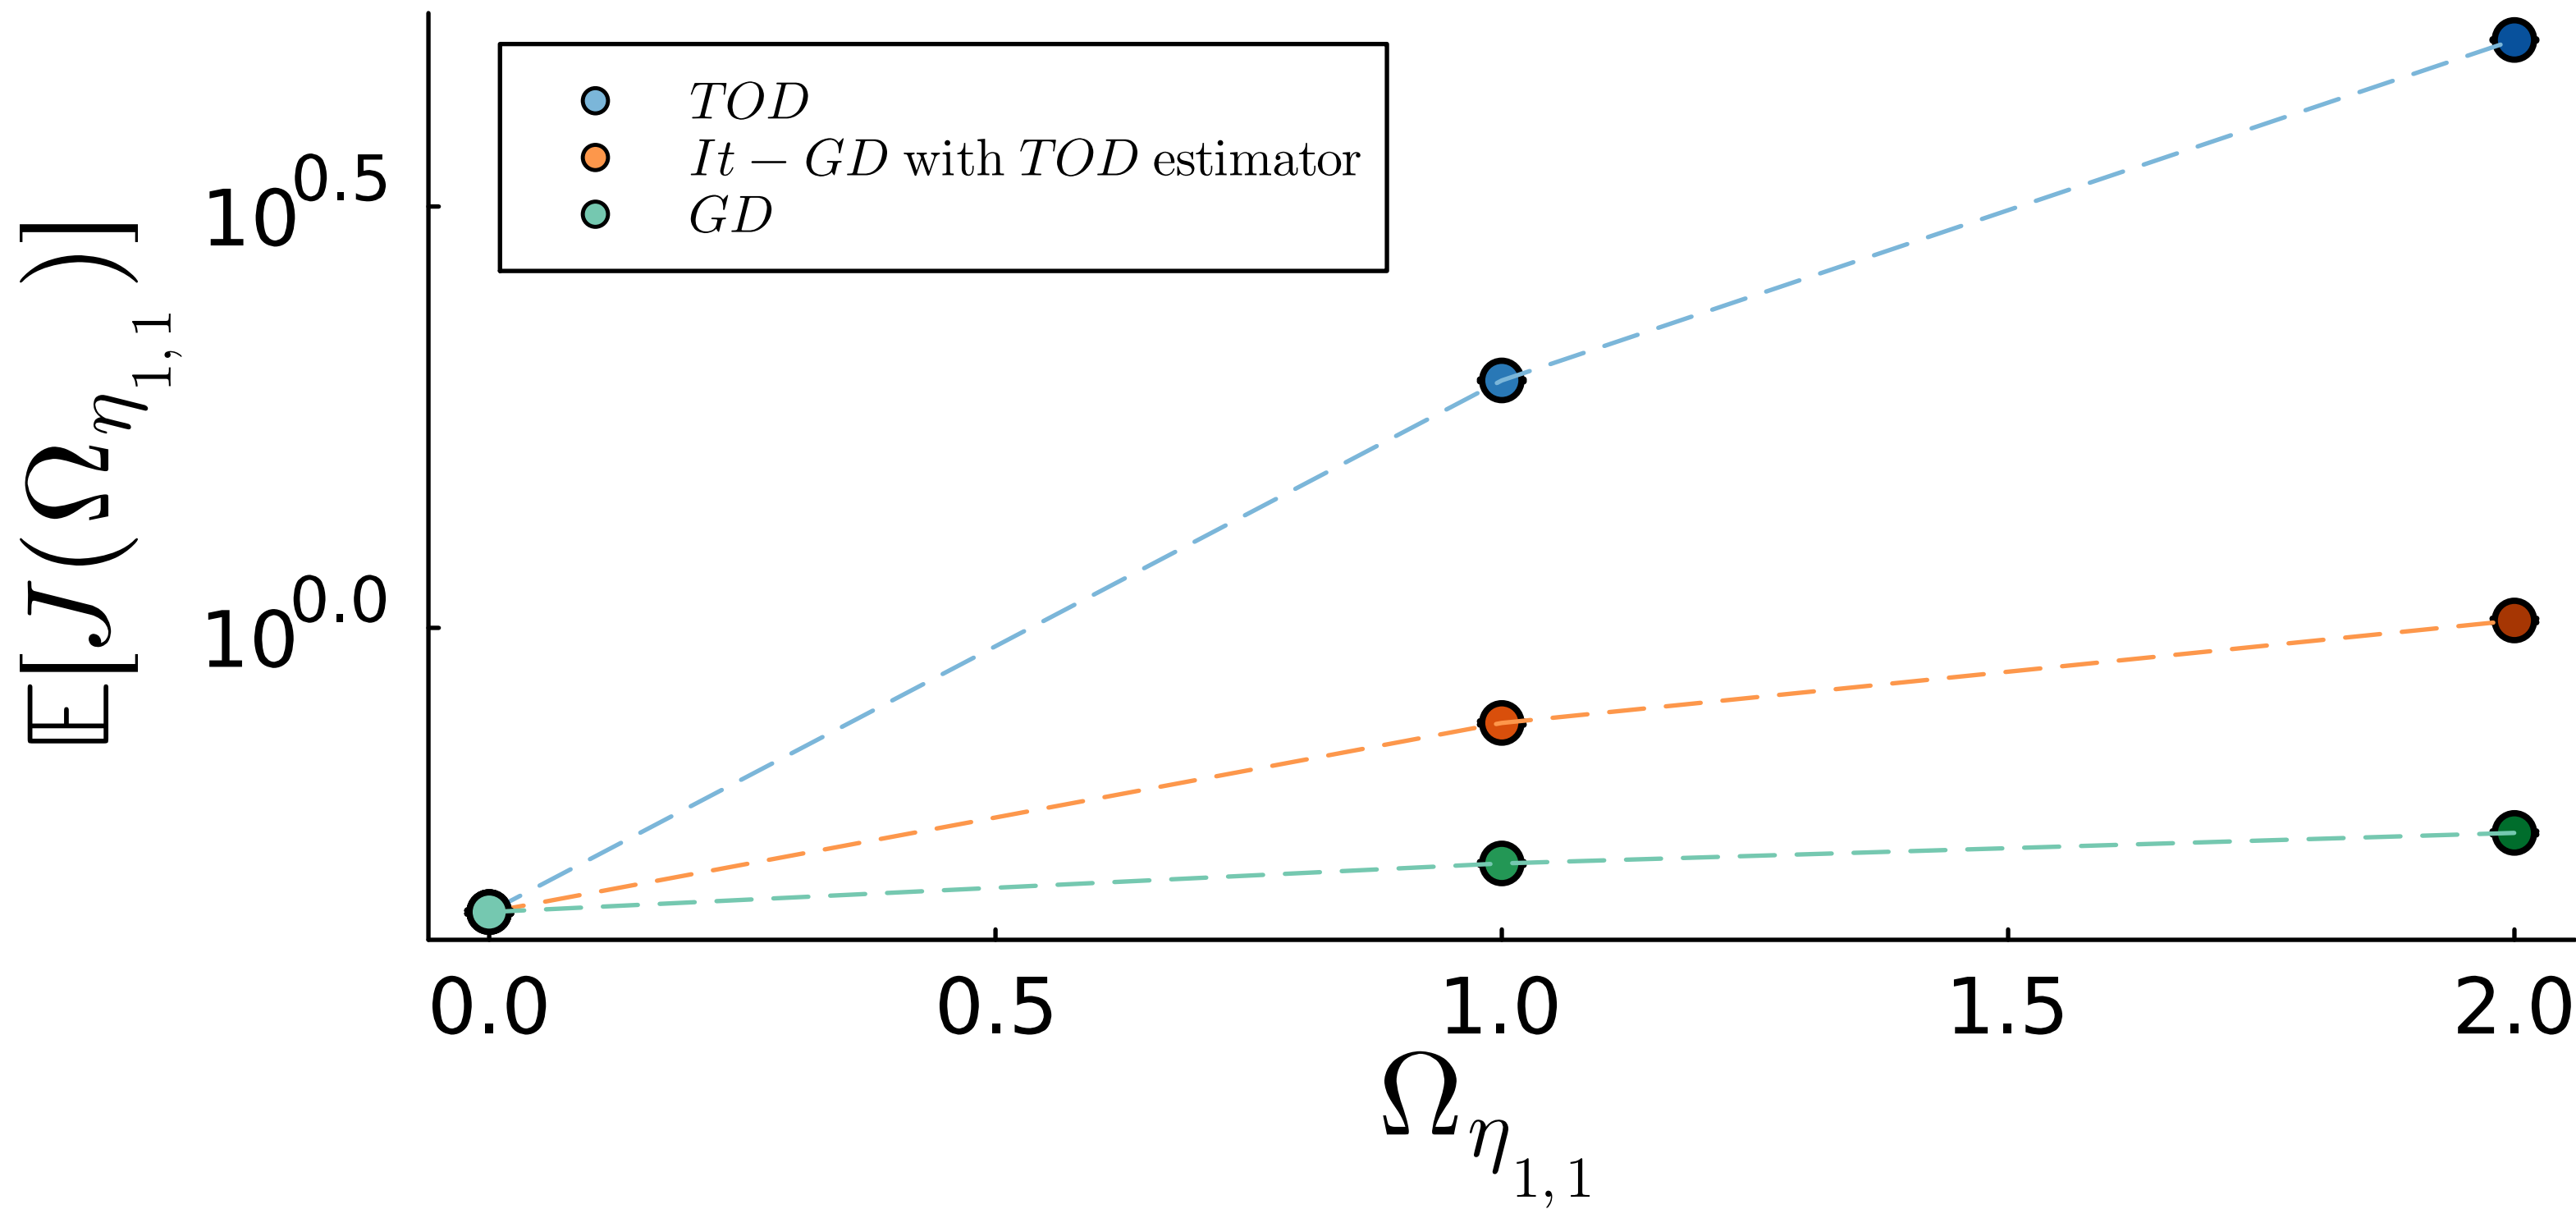

Supplement: supplementary_material [file attachment]
